# Supplementary material
Source: PubMed Central journal article supplement (PMC5644937)
Supplement: ofa-0010-0085-s01.pdf [file ofa-0010-0085-s01.pdf]

**Original Article**

---

# **Cord Blood Metabolome Is Highly Associated with Birth Weight, but Less Predictive for Later Weight Development**

Christian Hellmuth<sup>a</sup> Olaf Uhl<sup>a</sup> Marie Standl<sup>b</sup> Hans Demmelmair<sup>a</sup>  
Joachim Heinrich<sup>b, c</sup> Berthold Koletzko<sup>a</sup> Elisabeth Thiering<sup>a, b</sup>

<sup>a</sup>Division of Metabolic and Nutritional Medicine, Dr. von Hauner Children's Hospital, University of Munich Medical Center, Ludwig-Maximilians-Universität München, Munich, Germany; <sup>b</sup>Institute of Epidemiology I, Helmholtz Zentrum München, German Research Center for Environmental Health, Neuherberg, Germany; <sup>c</sup>Institute and Outpatient Clinic for Occupational, Social and Environmental Medicine, University of Munich Medical Center, Ludwig-Maximilians-Universität München, Munich, Germany

## **Supplemental Material**

Hellmuth et al.: Cord Blood Metabolome Is Highly Associated with Birth Weight, but Less Predictive for Later Weight Development

**Supplemental fig. 1** Cord blood metabolite levels of male and female newborns were compared by Mann Whitey U test.

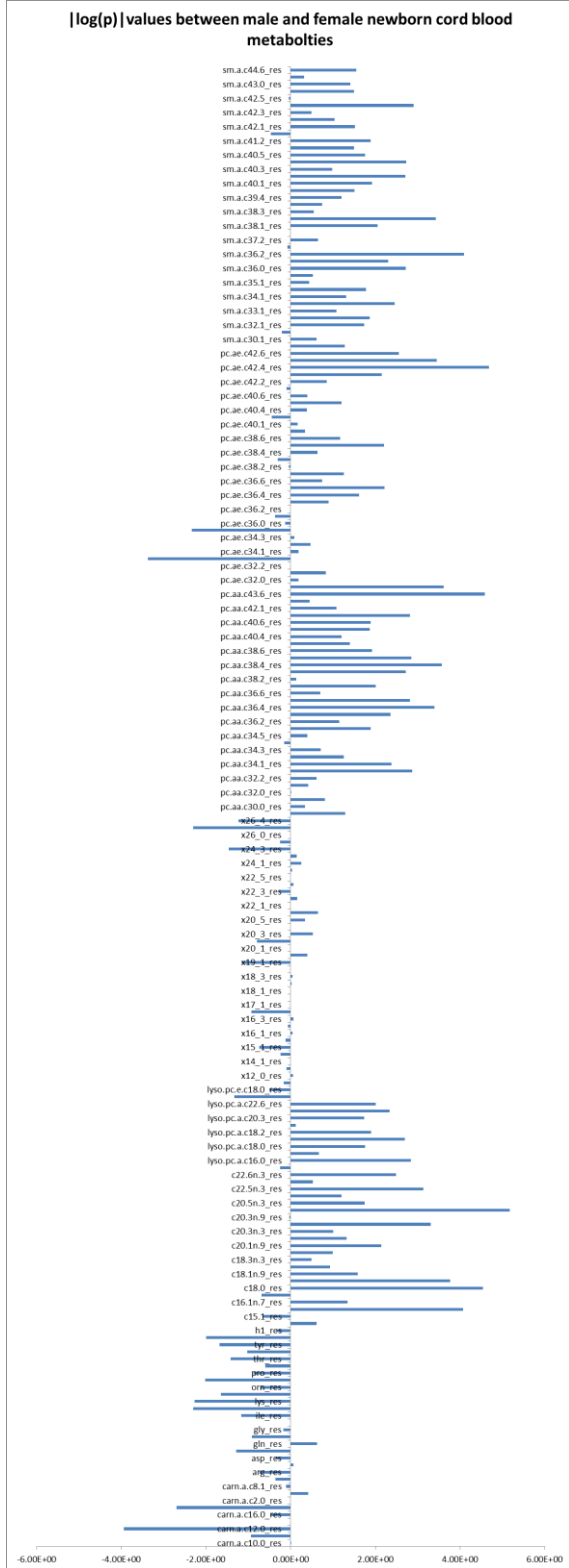

Hellmuth et al.: Cord Blood Metabolome Is Highly Associated with Birth Weight, but Less Predictive for Later Weight Development

**Supplemental table 1** Cord blood metabolite levels of male and female newborns were compared by Mann Whitey U test.

| Metabolite | Median (range) females<br>[μmol/l] | Median (range) males<br>[μmol/l] | Variation | p Mann Witney U |
|------------|------------------------------------|----------------------------------|-----------|-----------------|
| AC C10:0   | 0.130 (0.044-0.291)                | 0.128 (0.043-0.394)              | 2%        | 9.69E-01        |
| AC C10:1   | 0.38 (0.12-1.24)                   | 0.403 (0.088-1.611)              | -6%       | 1.15E-01        |
| AC C12:0   | 0.095 (0.023-0.307)                | 0.107 (0.025-0.289)              | -13%      | 1.13E-04        |
| AC C14:1   | 0.087 (0.024-0.295)                | 0.087 (0.034-0.271)              | 0%        | 5.06E-01        |
| AC C16:0   | 0.137 (0.046-0.584)                | 0.141 (0.047-0.579)              | -3%       | 3.36E-01        |
| AC C18:1   | 0.109 (0.033-0.383)                | 0.119 (0.022-0.470)              | -9%       | 2.00E-03        |
| AC C2:0    | 4.3 (1.9-10.2)                     | 4.3 (2.1-12.5)                   | 0%        | 6.08E-01        |
| AC C3:0    | 0.38 (0.11-1.01)                   | 0.37 (0.10-0.84)                 | 3%        | 3.82E-01        |
| AC C8:1    | 0.048 (0.009-0.176)                | 0.050 (0.009-0.201)              | -4%       | 7.88E-01        |
| Ala        | 577 (310-1385)                     | 598 (293-1268)                   | -4%       | 4.38E-01        |
| Arg        | 55 (11-192)                        | 56.0 (9.9-151.7)                 | -2%       | 1.83E-01        |
| Asn        | 61 (29-127)                        | 59 (19-123)                      | 3%        | 8.49E-01        |
| Asp        | 84 (25-257)                        | 85 (19-288)                      | -1%       | 4.35E-01        |
| C14:0      | 3.8 (2.0-7.7)                      | 3.7 (2.1-7.9)                    | 3%        | 2.45E-01        |
| C15:1      | 0.45 (0.17-1.72)                   | 0.46 (0.19-1.55)                 | -2%       | 2.23E-01        |
| C16:0      | 188 (126-305)                      | 182 (119-280)                    | 3%        | 8.44E-05        |
| C16:1 n7   | 10.2 (5.9-19.9)                    | 10.0 (5.1-21.8)                  | 2%        | 4.55E-02        |
| C17:0      | 2.1 (1.1-4.6)                      | 2.2 (1.2-4.7)                    | -5%       | 2.07E-01        |

Hellmuth et al.: Cord Blood Metabolome Is Highly Associated with Birth Weight, but Less Predictive for Later Weight Development

|          |                   |                   |     |          |
|----------|-------------------|-------------------|-----|----------|
| C18:0    | 104 (67-171)      | 99 (67-163)       | 5%  | 2.85E-05 |
| C18:1 n7 | 17 (11-32)        | 16 (10-26)        | 6%  | 1.71E-04 |
| C18:1 n9 | 61 (40-96)        | 58 (37-94)        | 5%  | 2.58E-02 |
| C18:2 n6 | 52 (29-93)        | 51 (27-104)       | 2%  | 1.18E-01 |
| C18:3 n3 | 0.54 (0.19-2.14)  | 0.52 (0.15-2.14)  | 4%  | 3.21E-01 |
| C18:3 n6 | 1.21 (0.58-2.91)  | 1.18 (0.54-2.68)  | 2%  | 1.02E-01 |
| C20:1 n9 | 0.60 (0.32-1.95)  | 0.57 (0.24-1.89)  | 5%  | 7.28E-03 |
| C20:2 n6 | 2.5 (1.2-5.9)     | 2.4 (1.3-6.0)     | 4%  | 4.79E-02 |
| C20:3 n3 | 1.20 (0.54-3.15)  | 1.13 (0.54-3.32)  | 6%  | 9.91E-02 |
| C20:3 n6 | 32 (18-57)        | 31 (17-56)        | 3%  | 4.88E-04 |
| C20:3 n9 | 3.12 (0.87-11.90) | 3.2 (1.1-11.5)    | -3% | 9.21E-01 |
| C20:4 n6 | 111 (66-185)      | 104 (65-179)      | 6%  | 6.66E-06 |
| C20:5 n3 | 2.09 (0.75-7.88)  | 1.90 (0.77-7.86)  | 9%  | 1.77E-02 |
| C22:4 n6 | 4.9 (2.4-10.8)    | 4.7 (2.4-10.2)    | 4%  | 6.26E-02 |
| C22:5 n3 | 3.2 (1.1-10.9)    | 2.93 (0.91-10.05) | 8%  | 7.29E-04 |
| C22:5 n6 | 6.2 (2.8-15.8)    | 6.1 (2.6-17.1)    | 2%  | 2.96E-01 |
| C22:6 n3 | 44 (20-81)        | 42 (19-84)        | 5%  | 3.21E-03 |
| Cit      | 15.9 (6.8-48.8)   | 16.3 (8.1-62.2)   | -3% | 5.18E-02 |
| Gln      | 265 (84-634)      | 261 (56-684)      | 2%  | 2.38E-01 |
| Glu      | 437 (180-866)     | 443 (184-804)     | -1% | 1.21E-01 |
| Gly      | 407 (235-914)     | 415 (217-948)     | -2% | 6.71E-01 |

Hellmuth et al.: Cord Blood Metabolome Is Highly Associated with Birth Weight, but Less Predictive for Later Weight Development

|            |                     |                     |     |          |
|------------|---------------------|---------------------|-----|----------|
| H1         | 1682 (71-14188)     | 1773 (76-11293)     | -5% | 4.57E-01 |
| His        | 137 (66-288)        | 137 (74-245)        | 0%  | 7.05E-01 |
| Ile        | 77 (46-133)         | 80 (42-147)         | -4% | 6.77E-02 |
| Leu        | 160 (94-284)        | 166 (92-289)        | -4% | 4.96E-03 |
| LPCa C14:0 | 1.79 (0.47-3.91)    | 1.80 (0.67-3.93)    | -1% | 5.64E-01 |
| LPCa C16:0 | 63 (24-155)         | 59 (26-129)         | 6%  | 1.45E-03 |
| LPCa C16:1 | 4.7 (1.6-9.3)       | 4.5 (1.9-10.3)      | 4%  | 2.16E-01 |
| LPCa C18:0 | 11.7 (4.3-33.9)     | 10.9 (5.7-25.4)     | 7%  | 1.76E-02 |
| LPCa C18:1 | 11.5 (3.6-26.9)     | 10.9 (4.1-22.9)     | 5%  | 1.99E-03 |
| LPCa C18:2 | 13.4 (4.7-29.3)     | 12.6 (4.6-27.3)     | 6%  | 1.26E-02 |
| LPCa C18:3 | 0.330 (0.066-1.036) | 0.325 (0.057-1.033) | 2%  | 7.49E-01 |
| LPCa C20:3 | 3.7 (1.2-8.2)       | 3.4 (1.1-7.9)       | 8%  | 1.81E-02 |
| LPCa C20:4 | 16.6 (5.8-37.0)     | 15.8 (5.4-33.2)     | 5%  | 4.59E-03 |
| LPCa C22:6 | 2.57 (0.72-5.63)    | 2.46 (0.73-4.90)    | 4%  | 9.88E-03 |
| LPCe C16:0 | 0.74 (0.26-1.68)    | 0.79 (0.23-1.76)    | -7% | 4.63E-02 |
| LPCe C18:0 | 0.89 (0.23-2.40)    | 0.92 (0.30-3.12)    | -3% | 3.16E-01 |
| LPCe C18:1 | 0.55 (0.16-1.52)    | 0.56 (0.19-1.39)    | -2% | 6.83E-01 |
| Lys        | 350 (194-637)       | 367 (211-695)       | -5% | 5.41E-03 |
| Met        | 39 (22-93)          | 41 (15-87)          | -5% | 2.26E-02 |
| NEFA C12:0 | 2.07 (0.34-9.54)    | 2.05 (0.36-15.66)   | 1%  | 8.84E-01 |
| NEFA C14:0 | 6.0 (1.3-20.8)      | 6.2 (1.2-22.3)      | -3% | 7.97E-01 |

Hellmuth et al.: Cord Blood Metabolome Is Highly Associated with Birth Weight, but Less Predictive for Later Weight Development

|            |                     |                     |     |          |
|------------|---------------------|---------------------|-----|----------|
| NEFA C14:1 | 1.20 (0.18-4.47)    | 1.20 (0.18-5.84)    | 0%  | 7.10E-01 |
| NEFA C15:0 | 0.94 (0.27-2.94)    | 1.00 (0.26-3.24)    | -6% | 5.71E-01 |
| NEFA C15:1 | 0.086 (0.017-0.256) | 0.090 (0.014-0.521) | -5% | 1.83E-01 |
| NEFA C16:0 | 64 (29-198)         | 66 (27-143)         | -3% | 7.63E-01 |
| NEFA C16:1 | 8.4 (1.7-42.9)      | 8.3 (1.7-45.2)      | 1%  | 8.95E-01 |
| NEFA C16:2 | 0.257 (0.090-0.899) | 0.265 (0.076-0.833) | -3% | 8.53E-01 |
| NEFA C16:3 | 0.174 (0.073-0.618) | 0.172 (0.062-0.488) | 1%  | 8.51E-01 |
| NEFA C17:0 | 1.05 (0.48-2.52)    | 1.08 (0.46-2.66)    | -3% | 1.19E-01 |
| NEFA C17:1 | 0.48 (0.15-1.32)    | 0.48 (0.14-1.51)    | 0%  | 1.99E-01 |
| NEFA C18:0 | 24 (11-57)          | 24 (13-52)          | 0%  | 4.29E-01 |
| NEFA C18:1 | 45 (16-141)         | 45 (16-132)         | 0%  | 9.26E-01 |
| NEFA C18:2 | 16.9 (5.7-52.5)     | 16.8 (4.8-49.2)     | 1%  | 9.60E-01 |
| NEFA C18:3 | 1.14 (0.30-3.87)    | 1.11 (0.25-4.30)    | 3%  | 9.01E-01 |
| NEFA C18:4 | 0.032 (0.005-0.128) | 0.032 (0.005-0.175) | 0%  | 9.57E-01 |
| NEFA C19:1 | 0.131 (0.043-0.367) | 0.134 (0.054-0.352) | -2% | 7.04E-02 |
| NEFA C20:0 | 0.155 (0.071-0.344) | 0.154 (0.063-0.394) | 1%  | 4.01E-01 |
| NEFA C20:1 | 0.38 (0.14-0.97)    | 0.38 (0.14-0.92)    | 0%  | 9.00E-01 |
| NEFA C20:2 | 0.45 (0.18-1.69)    | 0.47 (0.17-1.64)    | -4% | 1.59E-01 |
| NEFA C20:3 | 1.35 (0.42-3.60)    | 1.28 (0.65-4.13)    | 5%  | 2.98E-01 |
| NEFA C20:4 | 4.9 (1.6-13.9)      | 4.9 (1.8-18.1)      | 0%  | 2.47E-01 |
| NEFA C20:5 | 0.184 (0.048-0.794) | 0.180 (0.052-1.037) | 2%  | 4.52E-01 |

Hellmuth et al.: Cord Blood Metabolome Is Highly Associated with Birth Weight, but Less Predictive for Later Weight Development

|            |                     |                     |     |          |
|------------|---------------------|---------------------|-----|----------|
| NEFA C22:0 | 0.052 (0.013-0.276) | 0.050 (0.014-0.240) | 4%  | 2.25E-01 |
| NEFA C22:1 | 0.046 (0.012-0.122) | 0.046 (0.011-0.172) | 0%  | 9.30E-01 |
| NEFA C22:2 | 0.035 (0.015-0.087) | 0.034 (0.017-0.094) | 3%  | 7.00E-01 |
| NEFA C22:3 | 0.126 (0.049-0.341) | 0.128 (0.042-0.378) | -2% | 5.31E-01 |
| NEFA C22:4 | 0.57 (0.23-1.51)    | 0.55 (0.31-1.86)    | 4%  | 8.50E-01 |
| NEFA C22:5 | 0.64 (0.28-1.75)    | 0.64 (0.29-1.97)    | 0%  | 9.73E-01 |
| NEFA C22:6 | 3.0 (1.3-9.1)       | 2.9 (1.4-8.7)       | 3%  | 9.34E-01 |
| NEFA C24:1 | 0.192 (0.099-0.362) | 0.19 (0.10-0.41)    | 1%  | 5.66E-01 |
| NEFA C24:2 | 0.059 (0.031-0.100) | 0.057 (0.027-0.105) | 3%  | 7.23E-01 |
| NEFA C24:3 | 0.029 (0.014-0.070) | 0.031 (0.015-0.066) | -7% | 3.46E-02 |
| NEFA C24:4 | 0.104 (0.046-0.287) | 0.105 (0.051-0.254) | -1% | 5.61E-01 |
| NEFA C26:0 | 0.010 (0.004-0.040) | 0.010 (0.004-0.030) | 0%  | 5.07E-01 |
| NEFA C26:3 | 0.022 (0.011-0.045) | 0.023 (0.009-0.049) | -5% | 5.04E-03 |
| NEFA C26:4 | 0.044 (0.021-0.084) | 0.045 (0.022-0.107) | -2% | 5.84E-02 |
| Orn        | 173 (62-463)        | 176 (59-436)        | -2% | 1.91E-01 |
| PCa C28:2  | 0.061 (0.015-0.210) | 0.056 (0.011-0.173) | 8%  | 5.14E-02 |
| PCa C30:0  | 3.2 (1.1-8.3)       | 2.98 (0.98-7.67)    | 7%  | 4.60E-01 |
| PCa C30:2  | 0.42 (0.16-0.93)    | 0.40 (0.15-1.51)    | 5%  | 1.54E-01 |
| PCa C32:0  | 16.1 (6.1-36.1)     | 15.9 (6.5-41.2)     | 1%  | 9.61E-01 |
| PCa C32:1  | 13.8 (4.1-40.4)     | 13.7 (3.5-36.4)     | 1%  | 3.85E-01 |
| PCa C32:2  | 1.20 (0.49-2.55)    | 1.18 (0.42-2.74)    | 2%  | 2.41E-01 |

Hellmuth et al.: Cord Blood Metabolome Is Highly Associated with Birth Weight, but Less Predictive for Later Weight Development

|           |                     |                     |     |          |
|-----------|---------------------|---------------------|-----|----------|
| PCa C32:3 | 0.63 (0.18-1.34)    | 0.58 (0.22-1.48)    | 8%  | 1.35E-03 |
| PCa C34:1 | 126 (54-356)        | 119 (43-229)        | 6%  | 4.11E-03 |
| PCa C34:2 | 81 (40-212)         | 76 (31-198)         | 6%  | 5.54E-02 |
| PCa C34:3 | 3.8 (1.2-8.8)       | 3.7 (1.3-8.4)       | 3%  | 1.97E-01 |
| PCa C34:4 | 0.58 (0.20-1.58)    | 0.59 (0.18-1.51)    | -2% | 7.14E-01 |
| PCa C34:5 | 0.089 (0.017-0.346) | 0.085 (0.014-0.382) | 4%  | 4.04E-01 |
| PCa C36:1 | 23 (11-44)          | 21.3 (9.1-44.3)     | 7%  | 1.30E-02 |
| PCa C36:2 | 46 (21-87)          | 44 (21-86)          | 4%  | 7.16E-02 |
| PCa C36:3 | 64 (24-139)         | 62 (17-125)         | 3%  | 4.34E-03 |
| PCa C36:4 | 150 (64-298)        | 142 (60-284)        | 5%  | 3.96E-04 |
| PCa C36:5 | 4.2 (1.5-11.6)      | 3.9 (1.3-10.2)      | 7%  | 1.51E-03 |
| PCa C36:6 | 0.344 (0.060-1.114) | 0.332 (0.096-0.822) | 3%  | 1.97E-01 |
| PCa C38:0 | 1.58 (0.52-3.96)    | 1.50 (0.51-3.97)    | 5%  | 9.68E-03 |
| PCa C38:2 | 3.31 (0.69-9.53)    | 3.22 (0.78-14.09)   | 3%  | 7.38E-01 |
| PCa C38:3 | 40 (19-76)          | 37 (16-75)          | 8%  | 1.92E-03 |
| PCa C38:4 | 114 (52-220)        | 107 (50-235)        | 6%  | 2.70E-04 |
| PCa C38:5 | 25 (12-55)          | 24 (11-49)          | 4%  | 1.40E-03 |
| PCa C38:6 | 71 (31-148)         | 67 (25-143)         | 6%  | 1.20E-02 |
| PCa C40:0 | 0.69 (0.15-2.06)    | 0.65 (0.16-1.71)    | 6%  | 4.01E-02 |
| PCa C40:4 | 3.7 (1.5-8.7)       | 3.5 (1.5-7.7)       | 5%  | 6.31E-02 |
| PCa C40:5 | 7.1 (2.7-17.5)      | 6.8 (2.1-17.2)      | 4%  | 1.34E-02 |



Hellmuth et al.: Cord Blood Metabolome Is Highly Associated with Birth Weight, but Less Predictive for Later Weight Development

|            |                     |                     |      |          |
|------------|---------------------|---------------------|------|----------|
| PCa C40:6  | 30 (12-82)          | 29 (11-62)          | 3%   | 1.27E-02 |
| PCa C42:0  | 0.75 (0.14-1.96)    | 0.67 (0.18-1.66)    | 11%  | 1.54E-03 |
| PCa C42:1  | 0.53 (0.18-1.20)    | 0.51 (0.19-1.30)    | 4%   | 8.36E-02 |
| PCa C42:5  | 0.48 (0.13-1.12)    | 0.45 (0.16-1.11)    | 6%   | 3.57E-01 |
| PCa C43:6  | 1.08 (0.36-2.68)    | 0.97 (0.28-2.29)    | 10%  | 2.57E-05 |
| PCa C44:12 | 0.55 (0.18-2.22)    | 0.50 (0.16-1.82)    | 9%   | 2.42E-04 |
| PCe C32:0  | 2.9 (1.2-8.7)       | 2.8 (1.1-7.8)       | 3%   | 6.54E-01 |
| PCe C32:1  | 3.1 (1.2-7.5)       | 3.0 (1.3-6.8)       | 3%   | 1.47E-01 |
| PCe C32:2  | 0.94 (0.25-3.97)    | 0.94 (0.25-2.68)    | 0%   | 1.68E-01 |
| PCe C34:0  | 1.29 (0.35-4.18)    | 1.40 (0.49-3.99)    | -9%  | 4.28E-04 |
| PCe C34:1  | 5.3 (2.2-10.9)      | 5.2 (2.2-12.0)      | 2%   | 6.49E-01 |
| PCe C34:2  | 3.1 (1.2-5.9)       | 3.0 (1.4-6.2)       | 3%   | 3.42E-01 |
| PCe C34:3  | 1.26 (0.38-3.04)    | 1.24 (0.39-3.04)    | 2%   | 8.15E-01 |
| PCe C34:4  | 0.062 (0.008-0.223) | 0.074 (0.008-0.268) | -19% | 4.65E-03 |
| PCe C36:0  | 0.70 (0.22-1.63)    | 0.71 (0.24-1.72)    | -1%  | 7.45E-01 |
| PCe C36:1  | 3.3 (1.3-8.5)       | 3.4 (1.1-8.7)       | -3%  | 4.24E-01 |
| PCe C36:2  | 2.9 (1.2-6.2)       | 2.9 (1.3-6.9)       | 0%   | 5.38E-01 |
| PCe C36:3  | 2.01 (0.81-3.87)    | 1.92 (0.73-5.18)    | 4%   | 1.26E-01 |
| PCe C36:4  | 8.9 (3.9-20.3)      | 8.7 (4.2-17.5)      | 2%   | 2.42E-02 |
| PCe C36:5  | 6.5 (3.0-15.3)      | 6.2 (2.5-11.6)      | 5%   | 6.09E-03 |
| PCe C36:6  | 0.081 (0.002-0.378) | 0.075 (0.002-0.312) | 7%   | 1.81E-01 |

Hellmuth et al.: Cord Blood Metabolome Is Highly Associated with Birth Weight, but Less Predictive for Later Weight Development

|           |                     |                     |     |          |
|-----------|---------------------|---------------------|-----|----------|
| PCe C38:0 | 1.33 (0.52-5.66)    | 1.26 (0.36-3.47)    | 5%  | 5.58E-02 |
| PCe C38:2 | 0.84 (0.14-3.22)    | 0.85 (0.16-3.47)    | -1% | 9.07E-01 |
| PCe C38:3 | 3.2 (1.1-14.3)      | 3.28 (0.92-9.39)    | -2% | 4.95E-01 |
| PCe C38:4 | 9.7 (4.7-19.3)      | 9.6 (4.7-18.8)      | 1%  | 2.30E-01 |
| PCe C38:5 | 7.3 (3.2-16.2)      | 6.8 (3.2-13.6)      | 7%  | 6.25E-03 |
| PCe C38:6 | 3.6 (1.3-8.4)       | 3.5 (1.3-7.6)       | 3%  | 6.76E-02 |
| PCe C40:0 | 7.5 (3.1-15.7)      | 7.4 (2.9-16.9)      | 1%  | 4.58E-01 |
| PCe C40:1 | 1.19 (0.37-3.75)    | 1.12 (0.35-4.34)    | 6%  | 6.91E-01 |
| PCe C40:3 | 1.08 (0.21-5.08)    | 1.17 (0.27-4.90)    | -8% | 3.54E-01 |
| PCe C40:4 | 2.2 (1.0-5.9)       | 2.16 (0.76-5.00)    | 2%  | 4.09E-01 |
| PCe C40:5 | 2.53 (0.90-9.83)    | 2.45 (0.65-6.61)    | 3%  | 6.35E-02 |
| PCe C40:6 | 2.8 (1.1-7.3)       | 2.7 (1.2-7.2)       | 4%  | 4.03E-01 |
| PCe C42:1 | 0.59 (0.18-2.66)    | 0.60 (0.14-2.05)    | -2% | 8.00E-01 |
| PCe C42:2 | 0.401 (0.087-1.372) | 0.361 (0.084-1.701) | 10% | 1.40E-01 |
| PCe C42:3 | 0.64 (0.14-2.92)    | 0.59 (0.14-1.65)    | 8%  | 7.00E-03 |
| PCe C42:4 | 0.67 (0.17-1.60)    | 0.59 (0.19-1.55)    | 12% | 2.04E-05 |
| PCe C42:5 | 1.34 (0.48-3.80)    | 1.21 (0.35-3.19)    | 10% | 3.57E-04 |
| PCe C42:6 | 0.97 (0.30-2.90)    | 0.90 (0.25-2.72)    | 7%  | 2.75E-03 |
| Phe       | 113 (70-204)        | 117 (48-210)        | -4% | 9.46E-03 |
| Pro       | 216 (121-379)       | 220 (95-414)        | -2% | 1.35E-01 |
| Ser       | 242 (131-526)       | 247 (114-593)       | -2% | 2.53E-01 |

Hellmuth et al.: Cord Blood Metabolome Is Highly Associated with Birth Weight, but Less Predictive for Later Weight Development

|          |                     |                     |     |          |
|----------|---------------------|---------------------|-----|----------|
| SM C21:2 | 0.035 (0.005-0.108) | 0.032 (0.003-0.121) | 9%  | 5.26E-02 |
| SM C30:1 | 0.134 (0.028-0.514) | 0.126 (0.025-0.501) | 6%  | 2.44E-01 |
| SM C31:1 | 0.079 (0.010-0.230) | 0.082 (0.015-0.286) | -4% | 6.27E-01 |
| SM C32:1 | 3.3 (1.2-6.2)       | 3.1 (1.2-6.0)       | 6%  | 1.81E-02 |
| SM C32:2 | 0.42 (0.11-1.04)    | 0.41 (0.16-1.16)    | 2%  | 1.35E-02 |
| SM C33:1 | 2.27 (0.89-5.39)    | 2.2 (1.0-5.1)       | 3%  | 8.26E-02 |
| SM C34:0 | 3.1 (1.2-7.4)       | 2.9 (1.3-5.5)       | 6%  | 3.45E-03 |
| SM C34:1 | 59 (26-137)         | 57 (31-103)         | 3%  | 4.89E-02 |
| SM C34:2 | 10.2 (4.4-23.0)     | 9.9 (4.3-27.4)      | 3%  | 1.64E-02 |
| SM C35:1 | 1.79 (0.77-3.70)    | 1.75 (0.55-3.61)    | 2%  | 3.64E-01 |
| SM C35:2 | 0.282 (0.067-0.628) | 0.27 (0.10-0.87)    | 4%  | 2.99E-01 |
| SM C36:0 | 5.3 (2.8-9.7)       | 5.0 (2.2-12.6)      | 6%  | 1.89E-03 |
| SM C36:1 | 18.5 (7.8-41.1)     | 17.7 (7.4-39.0)     | 4%  | 5.00E-03 |
| SM C36:2 | 13.8 (5.1-27.4)     | 12.6 (4.2-26.1)     | 9%  | 7.95E-05 |
| SM C36:3 | 0.39 (0.10-1.01)    | 0.40 (0.12-1.16)    | -3% | 8.43E-01 |
| SM C37:2 | 0.209 (0.068-0.497) | 0.204 (0.069-0.517) | 2%  | 2.27E-01 |
| SM C37:3 | 0.073 (0.016-0.246) | 0.073 (0.015-0.207) | 0%  | 7.23E-01 |
| SM C38:1 | 17.8 (7.0-38.4)     | 17.0 (8.3-32.9)     | 4%  | 8.78E-03 |
| SM C38:2 | 9.4 (4.0-20.5)      | 8.7 (3.9-16.4)      | 7%  | 3.73E-04 |
| SM C38:3 | 0.190 (0.070-0.448) | 0.188 (0.044-0.415) | 1%  | 2.84E-01 |
| SM C39:1 | 1.68 (0.61-3.61)    | 1.63 (0.54-3.80)    | 3%  | 1.82E-01 |

Hellmuth et al.: Cord Blood Metabolome Is Highly Associated with Birth Weight, but Less Predictive for Later Weight Development

|          |                     |                     |     |          |
|----------|---------------------|---------------------|-----|----------|
| SM C39:4 | 0.72 (0.22-1.67)    | 0.66 (0.21-1.80)    | 8%  | 6.31E-02 |
| SM C39:5 | 0.261 (0.084-0.620) | 0.251 (0.074-0.600) | 4%  | 3.10E-02 |
| SM C40:1 | 9.6 (4.0-22.5)      | 9.1 (4.0-16.6)      | 5%  | 1.20E-02 |
| SM C40:2 | 15.9 (6.6-35.9)     | 14.8 (4.9-28.2)     | 7%  | 1.97E-03 |
| SM C40:3 | 5.2 (1.7-12.1)      | 5.1 (1.7-11.0)      | 2%  | 1.03E-01 |
| SM C40:4 | 2.10 (0.86-4.22)    | 1.98 (0.87-3.94)    | 6%  | 1.84E-03 |
| SM C40:5 | 0.45 (0.11-1.19)    | 0.43 (0.15-1.16)    | 4%  | 1.76E-02 |
| SM C41:1 | 3.4 (1.4-7.4)       | 3.3 (1.3-7.3)       | 3%  | 3.20E-02 |
| SM C41:2 | 3.0 (1.1-6.8)       | 2.8 (1.4-6.2)       | 7%  | 1.28E-02 |
| SM C41:5 | 0.114 (0.036-0.332) | 0.115 (0.034-0.393) | -1% | 3.42E-01 |
| SM C42:1 | 19.3 (9.4-39.8)     | 18.9 (9.2-36.6)     | 2%  | 3.00E-02 |
| SM C42:2 | 29 (15-65)          | 28 (12-56)          | 3%  | 9.11E-02 |
| SM C42:3 | 20.6 (8.4-47.4)     | 20.0 (6.8-49.0)     | 3%  | 3.19E-01 |
| SM C42:4 | 7.9 (3.5-14.9)      | 7.1 (3.4-14.5)      | 10% | 1.25E-03 |
| SM C42:5 | 2.01 (0.43-5.34)    | 2.03 (0.55-4.97)    | -1% | 9.14E-01 |
| SM C42:6 | 3.4 (1.4-7.0)       | 3.2 (1.3-7.5)       | 6%  | 3.16E-02 |
| SM C43:0 | 0.67 (0.20-1.37)    | 0.63 (0.24-1.52)    | 6%  | 3.88E-02 |
| SM C43:2 | 1.62 (0.65-4.15)    | 1.57 (0.56-3.84)    | 3%  | 4.84E-01 |
| SM C44:6 | 1.71 (0.60-5.35)    | 1.65 (0.47-3.90)    | 4%  | 2.84E-02 |
| Thr      | 256 (140-556)       | 269 (131-526)       | -5% | 3.78E-02 |
| Trp      | 78 (44-136)         | 79 (42-139)         | -1% | 9.44E-02 |

Hellmuth et al.: Cord Blood Metabolome Is Highly Associated with Birth Weight, but Less Predictive for Later Weight Development

|     |               |               |     |          |
|-----|---------------|---------------|-----|----------|
| Tyr | 77 (41-133)   | 80 (47-132)   | -4% | 2.08E-02 |
| Val | 275 (170-438) | 284 (165-407) | -3% | 9.96E-03 |

Hellmuth et al.: Cord Blood Metabolome Is Highly Associated with Birth Weight, but Less Predictive for Later Weight Development

**Supplemental table 2** The associations between metabolite concentrations in cord blood and birth weight were determined using linear regression models adjusted for study center, sex, gestational age, maternal smoking during the third trimester, maternal pre pregnancy BMI, maternal weight gain during pregnancy and maternal education (defined as low: less than 10 years, medium=10 years and high: more than 10 years of education). Linear regression models for **weight gain** z-scores included study center, sex, gestational age, and birth weight as adjustment variables, whereas the models for **zBMI (2 and 15 years)** were adjusted for study center, sex, and birth weight.

|          | Birth weight |         |       |        |       | Weight gain |         |       |        |       | BMI 2 years |         |       |        |       | BMI 15 years |         |       |        |       |
|----------|--------------|---------|-------|--------|-------|-------------|---------|-------|--------|-------|-------------|---------|-------|--------|-------|--------------|---------|-------|--------|-------|
|          | N            | $\beta$ | p     | p bonf | p fdr | N           | $\beta$ | p     | p bonf | p fdr | N           | $\beta$ | p     | p bonf | p fdr | N            | $\beta$ | p     | p bonf | p fdr |
| AC C10:0 | 608          | -22.611 | 0.126 | 1.000  | 0.317 | 615         | -0.093  | 0.130 | 1.000  | 0.745 | 585         | 0.024   | 0.575 | 1.000  | 0.999 | 425          | 0.003   | 0.959 | 1.000  | 0.982 |
| AC C10:1 | 590          | -24.687 | 0.103 | 1.000  | 0.272 | 596         | -0.049  | 0.439 | 1.000  | 0.901 | 567         | -0.019  | 0.676 | 1.000  | 0.999 | 410          | -0.006  | 0.909 | 1.000  | 0.963 |
| AC C12:0 | 620          | -34.219 | 0.022 | 1.000  | 0.090 | 629         | -0.064  | 0.305 | 1.000  | 0.848 | 601         | 0.031   | 0.448 | 1.000  | 0.999 | 422          | 0.042   | 0.391 | 1.000  | 0.907 |
| AC C14:1 | 661          | -27.762 | 0.050 | 1.000  | 0.165 | 673         | 0.005   | 0.926 | 1.000  | 0.974 | 638         | 0.051   | 0.185 | 1.000  | 0.999 | 457          | 0.067   | 0.137 | 1.000  | 0.666 |
| AC C16:0 | 663          | -3.620  | 0.804 | 1.000  | 0.879 | 675         | 0.034   | 0.567 | 1.000  | 0.911 | 643         | -0.017  | 0.671 | 1.000  | 0.999 | 460          | 0.071   | 0.146 | 1.000  | 0.666 |
| AC C18:1 | 629          | -16.656 | 0.277 | 1.000  | 0.540 | 639         | 0.073   | 0.239 | 1.000  | 0.770 | 611         | 0.047   | 0.240 | 1.000  | 0.999 | 432          | 0.090   | 0.072 | 1.000  | 0.666 |
| AC C2:0  | 660          | -43.974 | 0.002 | 0.508  | 0.018 | 672         | 0.042   | 0.476 | 1.000  | 0.901 | 640         | 0.026   | 0.526 | 1.000  | 0.999 | 459          | 0.017   | 0.732 | 1.000  | 0.963 |
| AC C3:0  | 662          | -12.276 | 0.401 | 1.000  | 0.632 | 674         | -0.005  | 0.928 | 1.000  | 0.974 | 642         | 0.036   | 0.373 | 1.000  | 0.999 | 459          | 0.017   | 0.723 | 1.000  | 0.963 |
| AC C8:1  | 662          | -35.467 | 0.012 | 1.000  | 0.055 | 673         | -0.013  | 0.820 | 1.000  | 0.942 | 642         | -0.028  | 0.483 | 1.000  | 0.999 | 459          | -0.007  | 0.889 | 1.000  | 0.963 |
| Ala      | 661          | -39.573 | 0.006 | 1.000  | 0.036 | 674         | 0.095   | 0.108 | 1.000  | 0.745 | 643         | 0.047   | 0.242 | 1.000  | 0.999 | 460          | 0.057   | 0.236 | 1.000  | 0.807 |
| Arg      | 662          | 22.758  | 0.128 | 1.000  | 0.318 | 675         | -0.057  | 0.352 | 1.000  | 0.901 | 643         | 0.026   | 0.534 | 1.000  | 0.999 | 461          | 0.014   | 0.788 | 1.000  | 0.963 |
| Asn      | 662          | -10.385 | 0.462 | 1.000  | 0.663 | 675         | 0.079   | 0.166 | 1.000  | 0.745 | 643         | 0.063   | 0.107 | 1.000  | 0.999 | 461          | 0.062   | 0.194 | 1.000  | 0.738 |
| Asp      | 659          | -15.897 | 0.255 | 1.000  | 0.523 | 672         | 0.078   | 0.185 | 1.000  | 0.745 | 640         | 0.019   | 0.633 | 1.000  | 0.999 | 458          | -0.005  | 0.911 | 1.000  | 0.963 |
| C14:0    | 652          | -35.066 | 0.015 | 1.000  | 0.067 | 665         | 0.048   | 0.415 | 1.000  | 0.901 | 634         | 0.040   | 0.307 | 1.000  | 0.999 | 452          | -0.028  | 0.540 | 1.000  | 0.963 |
| C15:1    | 654          | -14.245 | 0.340 | 1.000  | 0.583 | 668         | -0.034  | 0.579 | 1.000  | 0.911 | 636         | 0.040   | 0.304 | 1.000  | 0.999 | 453          | -0.065  | 0.160 | 1.000  | 0.666 |
| C16:0    | 662          | 1.254   | 0.933 | 1.000  | 0.951 | 675         | 0.049   | 0.411 | 1.000  | 0.901 | 643         | 0.022   | 0.592 | 1.000  | 0.999 | 459          | -0.006  | 0.912 | 1.000  | 0.963 |

Hellmuth et al.: Cord Blood Metabolome Is Highly Associated with Birth Weight, but Less Predictive for Later Weight Development

|          |     |         |       |       |       |     |        |       |       |       |     |        |       |       |       |     |        |       |       |       |
|----------|-----|---------|-------|-------|-------|-----|--------|-------|-------|-------|-----|--------|-------|-------|-------|-----|--------|-------|-------|-------|
| C16:1 n7 | 663 | -5.302  | 0.712 | 1.000 | 0.839 | 675 | -0.040 | 0.499 | 1.000 | 0.901 | 643 | 0.025  | 0.534 | 1.000 | 0.999 | 460 | -0.010 | 0.840 | 1.000 | 0.963 |
| C17:0    | 651 | -52.655 | 0.000 | 0.056 | 0.004 | 665 | 0.080  | 0.180 | 1.000 | 0.745 | 633 | 0.025  | 0.526 | 1.000 | 0.999 | 451 | -0.016 | 0.747 | 1.000 | 0.963 |
| C18:0    | 662 | -4.181  | 0.776 | 1.000 | 0.865 | 675 | 0.065  | 0.279 | 1.000 | 0.797 | 643 | 0.000  | 0.996 | 1.000 | 0.999 | 459 | 0.005  | 0.927 | 1.000 | 0.964 |
| C18:1 n7 | 663 | 19.909  | 0.183 | 1.000 | 0.415 | 676 | 0.020  | 0.740 | 1.000 | 0.936 | 644 | 0.018  | 0.663 | 1.000 | 0.999 | 460 | 0.049  | 0.332 | 1.000 | 0.907 |
| C18:1 n9 | 661 | 5.833   | 0.688 | 1.000 | 0.822 | 674 | 0.062  | 0.308 | 1.000 | 0.848 | 642 | 0.056  | 0.169 | 1.000 | 0.999 | 459 | -0.018 | 0.715 | 1.000 | 0.963 |
| C18:2 n6 | 662 | -39.715 | 0.005 | 1.000 | 0.035 | 675 | 0.040  | 0.509 | 1.000 | 0.901 | 643 | 0.034  | 0.410 | 1.000 | 0.999 | 459 | -0.010 | 0.839 | 1.000 | 0.963 |
| C18:3 n3 | 647 | -57.413 | 0.000 | 0.012 | 0.001 | 660 | 0.095  | 0.109 | 1.000 | 0.745 | 628 | -0.004 | 0.924 | 1.000 | 0.999 | 448 | 0.032  | 0.496 | 1.000 | 0.963 |
| C18:3 n6 | 651 | -12.009 | 0.401 | 1.000 | 0.632 | 665 | 0.046  | 0.429 | 1.000 | 0.901 | 633 | 0.024  | 0.538 | 1.000 | 0.999 | 451 | -0.012 | 0.793 | 1.000 | 0.963 |
| C20:1 n9 | 625 | -13.776 | 0.323 | 1.000 | 0.583 | 639 | 0.093  | 0.115 | 1.000 | 0.745 | 606 | 0.023  | 0.577 | 1.000 | 0.999 | 433 | 0.002  | 0.974 | 1.000 | 0.988 |
| C20:2 n6 | 649 | 10.665  | 0.447 | 1.000 | 0.659 | 663 | 0.129  | 0.025 | 1.000 | 0.745 | 632 | 0.029  | 0.460 | 1.000 | 0.999 | 449 | -0.024 | 0.615 | 1.000 | 0.963 |
| C20:3 n3 | 643 | -8.568  | 0.547 | 1.000 | 0.742 | 658 | 0.085  | 0.141 | 1.000 | 0.745 | 626 | -0.004 | 0.910 | 1.000 | 0.999 | 444 | 0.078  | 0.114 | 1.000 | 0.666 |
| C20:3 n6 | 661 | 46.004  | 0.001 | 0.304 | 0.013 | 674 | 0.024  | 0.690 | 1.000 | 0.930 | 642 | 0.004  | 0.923 | 1.000 | 0.999 | 458 | -0.011 | 0.821 | 1.000 | 0.963 |
| C20:3 n9 | 663 | 108.707 | 0.000 | 0.000 | 0.000 | 676 | -0.006 | 0.928 | 1.000 | 0.974 | 644 | 0.042  | 0.308 | 1.000 | 0.999 | 460 | -0.062 | 0.200 | 1.000 | 0.747 |
| C20:4 n6 | 662 | -9.250  | 0.534 | 1.000 | 0.729 | 674 | 0.022  | 0.718 | 1.000 | 0.932 | 642 | 0.009  | 0.834 | 1.000 | 0.999 | 459 | 0.045  | 0.384 | 1.000 | 0.907 |
| C20:5 n3 | 658 | -45.305 | 0.002 | 0.327 | 0.013 | 671 | 0.135  | 0.025 | 1.000 | 0.745 | 639 | 0.018  | 0.655 | 1.000 | 0.999 | 456 | -0.028 | 0.563 | 1.000 | 0.963 |
| C22:4 n6 | 645 | 1.305   | 0.930 | 1.000 | 0.951 | 660 | 0.098  | 0.110 | 1.000 | 0.745 | 628 | -0.025 | 0.546 | 1.000 | 0.999 | 446 | -0.017 | 0.738 | 1.000 | 0.963 |
| C22:5 n3 | 660 | -39.817 | 0.009 | 1.000 | 0.043 | 672 | 0.072  | 0.255 | 1.000 | 0.790 | 640 | -0.025 | 0.541 | 1.000 | 0.999 | 456 | -0.029 | 0.565 | 1.000 | 0.963 |
| C22:5 n6 | 663 | 76.289  | 0.000 | 0.000 | 0.000 | 676 | -0.017 | 0.777 | 1.000 | 0.936 | 644 | 0.016  | 0.692 | 1.000 | 0.999 | 460 | -0.044 | 0.364 | 1.000 | 0.907 |
| C22:6 n3 | 663 | -37.048 | 0.015 | 1.000 | 0.067 | 676 | -0.020 | 0.746 | 1.000 | 0.936 | 644 | 0.002  | 0.962 | 1.000 | 0.999 | 460 | -0.039 | 0.434 | 1.000 | 0.955 |
| Cit      | 655 | 7.409   | 0.595 | 1.000 | 0.774 | 667 | -0.011 | 0.849 | 1.000 | 0.950 | 636 | -0.004 | 0.913 | 1.000 | 0.999 | 456 | 0.009  | 0.849 | 1.000 | 0.963 |
| Gln      | 644 | -4.132  | 0.770 | 1.000 | 0.865 | 657 | -0.040 | 0.492 | 1.000 | 0.901 | 628 | -0.017 | 0.664 | 1.000 | 0.999 | 450 | -0.046 | 0.329 | 1.000 | 0.907 |
| Glu      | 601 | -2.781  | 0.853 | 1.000 | 0.914 | 612 | 0.078  | 0.212 | 1.000 | 0.760 | 583 | 0.045  | 0.283 | 1.000 | 0.999 | 418 | 0.056  | 0.290 | 1.000 | 0.907 |
| Gly      | 663 | 0.494   | 0.972 | 1.000 | 0.977 | 676 | 0.036  | 0.535 | 1.000 | 0.911 | 644 | 0.001  | 0.980 | 1.000 | 0.999 | 461 | 0.009  | 0.851 | 1.000 | 0.963 |
| H1       | 644 | 15.693  | 0.291 | 1.000 | 0.562 | 658 | -0.090 | 0.131 | 1.000 | 0.745 | 627 | -0.060 | 0.148 | 1.000 | 0.999 | 449 | -0.011 | 0.822 | 1.000 | 0.963 |
| His      | 662 | 43.757  | 0.001 | 0.311 | 0.013 | 675 | 0.067  | 0.234 | 1.000 | 0.768 | 643 | 0.009  | 0.817 | 1.000 | 0.999 | 460 | -0.005 | 0.911 | 1.000 | 0.963 |
| Ile      | 660 | 14.209  | 0.318 | 1.000 | 0.583 | 673 | -0.023 | 0.694 | 1.000 | 0.930 | 642 | 0.010  | 0.807 | 1.000 | 0.999 | 459 | 0.087  | 0.067 | 1.000 | 0.666 |

Hellmuth et al.: Cord Blood Metabolome Is Highly Associated with Birth Weight, but Less Predictive for Later Weight Development

|            |     |         |       |       |       |     |        |       |       |       |     |        |       |       |       |     |        |       |       |       |
|------------|-----|---------|-------|-------|-------|-----|--------|-------|-------|-------|-----|--------|-------|-------|-------|-----|--------|-------|-------|-------|
| Leu        | 661 | -7.401  | 0.601 | 1.000 | 0.774 | 674 | -0.027 | 0.640 | 1.000 | 0.918 | 642 | 0.035  | 0.364 | 1.000 | 0.999 | 460 | 0.094  | 0.047 | 1.000 | 0.666 |
| LPCa C14:0 | 662 | 75.566  | 0.000 | 0.000 | 0.000 | 673 | -0.071 | 0.234 | 1.000 | 0.768 | 641 | -0.007 | 0.860 | 1.000 | 0.999 | 458 | -0.010 | 0.842 | 1.000 | 0.963 |
| LPCa C16:0 | 662 | 61.943  | 0.000 | 0.001 | 0.000 | 674 | -0.081 | 0.159 | 1.000 | 0.745 | 642 | -0.031 | 0.426 | 1.000 | 0.999 | 459 | -0.020 | 0.668 | 1.000 | 0.963 |
| LPCa C16:1 | 662 | 130.448 | 0.000 | 0.000 | 0.000 | 674 | -0.113 | 0.072 | 1.000 | 0.745 | 642 | -0.007 | 0.873 | 1.000 | 0.999 | 460 | -0.032 | 0.502 | 1.000 | 0.963 |
| LPCa C18:0 | 663 | 26.755  | 0.054 | 1.000 | 0.168 | 675 | -0.042 | 0.464 | 1.000 | 0.901 | 643 | -0.021 | 0.582 | 1.000 | 0.999 | 460 | -0.048 | 0.308 | 1.000 | 0.907 |
| LPCa C18:1 | 664 | 125.436 | 0.000 | 0.000 | 0.000 | 676 | -0.102 | 0.108 | 1.000 | 0.745 | 644 | -0.017 | 0.685 | 1.000 | 0.999 | 461 | -0.020 | 0.672 | 1.000 | 0.963 |
| LPCa C18:2 | 661 | 86.490  | 0.000 | 0.000 | 0.000 | 673 | -0.127 | 0.043 | 1.000 | 0.745 | 642 | -0.007 | 0.874 | 1.000 | 0.999 | 459 | -0.035 | 0.480 | 1.000 | 0.963 |
| LPCa C18:3 | 555 | 66.597  | 0.000 | 0.003 | 0.000 | 559 | 0.065  | 0.323 | 1.000 | 0.865 | 535 | 0.032  | 0.456 | 1.000 | 0.999 | 381 | -0.022 | 0.652 | 1.000 | 0.963 |
| LPCa C20:3 | 661 | 110.129 | 0.000 | 0.000 | 0.000 | 673 | -0.090 | 0.153 | 1.000 | 0.745 | 642 | -0.037 | 0.369 | 1.000 | 0.999 | 459 | 0.008  | 0.863 | 1.000 | 0.963 |
| LPCa C20:4 | 660 | 81.912  | 0.000 | 0.000 | 0.000 | 672 | -0.055 | 0.373 | 1.000 | 0.901 | 641 | -0.021 | 0.607 | 1.000 | 0.999 | 458 | 0.040  | 0.418 | 1.000 | 0.940 |
| LPCa C22:6 | 601 | 50.504  | 0.001 | 0.142 | 0.008 | 611 | -0.031 | 0.616 | 1.000 | 0.916 | 581 | -0.039 | 0.350 | 1.000 | 0.999 | 409 | -0.027 | 0.579 | 1.000 | 0.963 |
| LPCe C16:0 | 628 | 42.761  | 0.003 | 0.669 | 0.022 | 640 | -0.109 | 0.074 | 1.000 | 0.745 | 612 | 0.072  | 0.070 | 1.000 | 0.999 | 434 | -0.028 | 0.569 | 1.000 | 0.963 |
| LPCe C18:0 | 658 | -4.128  | 0.778 | 1.000 | 0.865 | 670 | -0.120 | 0.045 | 1.000 | 0.745 | 638 | -0.007 | 0.864 | 1.000 | 0.999 | 457 | -0.128 | 0.007 | 1.000 | 0.588 |
| LPCe C18:1 | 373 | 47.998  | 0.012 | 1.000 | 0.058 | 383 | 0.046  | 0.533 | 1.000 | 0.911 | 362 | 0.082  | 0.121 | 1.000 | 0.999 | 251 | -0.021 | 0.738 | 1.000 | 0.963 |
| Lys        | 551 | -7.098  | 0.652 | 1.000 | 0.811 | 556 | 0.069  | 0.276 | 1.000 | 0.797 | 534 | 0.030  | 0.463 | 1.000 | 0.999 | 381 | 0.047  | 0.339 | 1.000 | 0.907 |
| Met        | 661 | -13.783 | 0.332 | 1.000 | 0.583 | 674 | -0.013 | 0.817 | 1.000 | 0.942 | 644 | 0.028  | 0.463 | 1.000 | 0.999 | 460 | 0.042  | 0.380 | 1.000 | 0.907 |
| NEFA C12:0 | 661 | -10.617 | 0.453 | 1.000 | 0.662 | 674 | 0.038  | 0.509 | 1.000 | 0.901 | 642 | 0.020  | 0.615 | 1.000 | 0.999 | 460 | 0.027  | 0.554 | 1.000 | 0.963 |
| NEFA C14:0 | 661 | -6.528  | 0.639 | 1.000 | 0.800 | 674 | 0.024  | 0.680 | 1.000 | 0.929 | 642 | 0.012  | 0.760 | 1.000 | 0.999 | 459 | 0.067  | 0.148 | 1.000 | 0.666 |
| NEFA C14:1 | 663 | -11.810 | 0.405 | 1.000 | 0.632 | 675 | 0.011  | 0.846 | 1.000 | 0.950 | 644 | 0.038  | 0.352 | 1.000 | 0.999 | 460 | 0.079  | 0.094 | 1.000 | 0.666 |
| NEFA C15:0 | 660 | -9.998  | 0.484 | 1.000 | 0.684 | 672 | 0.028  | 0.627 | 1.000 | 0.916 | 640 | 0.009  | 0.832 | 1.000 | 0.999 | 458 | 0.046  | 0.332 | 1.000 | 0.907 |
| NEFA C15:1 | 575 | -16.121 | 0.318 | 1.000 | 0.583 | 589 | -0.005 | 0.935 | 1.000 | 0.974 | 563 | 0.004  | 0.927 | 1.000 | 0.999 | 400 | 0.072  | 0.172 | 1.000 | 0.677 |
| NEFA C16:0 | 661 | -31.521 | 0.026 | 1.000 | 0.101 | 674 | 0.094  | 0.106 | 1.000 | 0.745 | 642 | -0.005 | 0.897 | 1.000 | 0.999 | 459 | 0.075  | 0.111 | 1.000 | 0.666 |
| NEFA C16:1 | 664 | -17.172 | 0.223 | 1.000 | 0.468 | 676 | 0.021  | 0.713 | 1.000 | 0.932 | 644 | 0.013  | 0.739 | 1.000 | 0.999 | 461 | 0.091  | 0.054 | 1.000 | 0.666 |
| NEFA C16:2 | 601 | -35.557 | 0.017 | 1.000 | 0.076 | 612 | 0.091  | 0.150 | 1.000 | 0.745 | 583 | 0.054  | 0.207 | 1.000 | 0.999 | 418 | 0.079  | 0.114 | 1.000 | 0.666 |
| NEFA C16:3 | 529 | -45.929 | 0.004 | 0.774 | 0.025 | 542 | 0.210  | 0.001 | 0.292 | 0.201 | 515 | 0.037  | 0.419 | 1.000 | 0.999 | 367 | 0.042  | 0.449 | 1.000 | 0.963 |
| NEFA C17:0 | 661 | -33.188 | 0.024 | 1.000 | 0.096 | 672 | 0.085  | 0.164 | 1.000 | 0.745 | 640 | 0.042  | 0.311 | 1.000 | 0.999 | 458 | 0.072  | 0.132 | 1.000 | 0.666 |



|                        |                                            |
|------------------------|--------------------------------------------|
| Obes Facts             |                                            |
| DOI: 10.1159/000453001 | © 2017 The Author(s)<br>www.karger.com/ofa |

Hellmuth et al.: Cord Blood Metabolome Is Highly Associated with Birth Weight, but Less Predictive for Later Weight Development

|            |     |         |       |       |       |     |       |       |       |       |     |        |       |       |       |     |        |       |       |       |
|------------|-----|---------|-------|-------|-------|-----|-------|-------|-------|-------|-----|--------|-------|-------|-------|-----|--------|-------|-------|-------|
| NEFA C17:1 | 661 | -10.562 | 0.462 | 1.000 | 0.663 | 673 | 0.056 | 0.348 | 1.000 | 0.901 | 641 | 0.030  | 0.470 | 1.000 | 0.999 | 458 | 0.108  | 0.023 | 1.000 | 0.588 |
| NEFA C18:0 | 659 | -38.428 | 0.006 | 1.000 | 0.036 | 671 | 0.110 | 0.057 | 1.000 | 0.745 | 639 | 0.017  | 0.663 | 1.000 | 0.999 | 458 | 0.026  | 0.580 | 1.000 | 0.963 |
| NEFA C18:1 | 661 | -11.496 | 0.419 | 1.000 | 0.645 | 674 | 0.074 | 0.210 | 1.000 | 0.760 | 642 | 0.023  | 0.569 | 1.000 | 0.999 | 459 | 0.107  | 0.025 | 1.000 | 0.588 |
| NEFA C18:2 | 661 | -24.593 | 0.080 | 1.000 | 0.230 | 674 | 0.077 | 0.184 | 1.000 | 0.745 | 642 | 0.019  | 0.629 | 1.000 | 0.999 | 459 | 0.072  | 0.127 | 1.000 | 0.666 |
| NEFA C18:3 | 661 | -16.959 | 0.224 | 1.000 | 0.468 | 673 | 0.093 | 0.110 | 1.000 | 0.745 | 641 | 0.034  | 0.400 | 1.000 | 0.999 | 458 | 0.062  | 0.191 | 1.000 | 0.738 |
| NEFA C18:4 | 591 | -40.638 | 0.006 | 1.000 | 0.036 | 603 | 0.077 | 0.235 | 1.000 | 0.768 | 574 | 0.036  | 0.399 | 1.000 | 0.999 | 413 | 0.035  | 0.480 | 1.000 | 0.963 |
| NEFA C19:1 | 661 | -19.921 | 0.170 | 1.000 | 0.394 | 674 | 0.056 | 0.346 | 1.000 | 0.901 | 642 | 0.046  | 0.258 | 1.000 | 0.999 | 459 | 0.096  | 0.041 | 1.000 | 0.661 |
| NEFA C20:0 | 530 | -12.618 | 0.440 | 1.000 | 0.656 | 537 | 0.091 | 0.182 | 1.000 | 0.745 | 511 | 0.021  | 0.647 | 1.000 | 0.999 | 364 | -0.005 | 0.924 | 1.000 | 0.964 |
| NEFA C20:1 | 661 | -1.471  | 0.917 | 1.000 | 0.948 | 674 | 0.097 | 0.099 | 1.000 | 0.745 | 642 | 0.002  | 0.952 | 1.000 | 0.999 | 459 | 0.102  | 0.032 | 1.000 | 0.650 |
| NEFA C20:2 | 583 | -42.052 | 0.006 | 1.000 | 0.036 | 598 | 0.077 | 0.219 | 1.000 | 0.764 | 567 | 0.023  | 0.590 | 1.000 | 0.999 | 399 | 0.122  | 0.022 | 1.000 | 0.588 |
| NEFA C20:3 | 630 | -17.823 | 0.208 | 1.000 | 0.458 | 641 | 0.069 | 0.257 | 1.000 | 0.790 | 613 | -0.024 | 0.544 | 1.000 | 0.999 | 435 | 0.092  | 0.066 | 1.000 | 0.666 |
| NEFA C20:4 | 661 | -25.671 | 0.067 | 1.000 | 0.203 | 674 | 0.079 | 0.176 | 1.000 | 0.745 | 642 | -0.059 | 0.137 | 1.000 | 0.999 | 460 | 0.090  | 0.075 | 1.000 | 0.666 |
| NEFA C20:5 | 600 | -73.087 | 0.000 | 0.000 | 0.000 | 616 | 0.100 | 0.110 | 1.000 | 0.745 | 585 | 0.013  | 0.751 | 1.000 | 0.999 | 418 | 0.071  | 0.166 | 1.000 | 0.666 |
| NEFA C22:0 | 551 | -7.834  | 0.637 | 1.000 | 0.800 | 558 | 0.042 | 0.542 | 1.000 | 0.911 | 534 | 0.009  | 0.836 | 1.000 | 0.999 | 375 | -0.029 | 0.590 | 1.000 | 0.963 |
| NEFA C22:1 | 584 | 11.769  | 0.443 | 1.000 | 0.657 | 595 | 0.121 | 0.053 | 1.000 | 0.745 | 571 | 0.084  | 0.043 | 1.000 | 0.999 | 402 | 0.096  | 0.056 | 1.000 | 0.666 |
| NEFA C22:2 | 574 | -3.956  | 0.802 | 1.000 | 0.879 | 585 | 0.087 | 0.177 | 1.000 | 0.745 | 561 | 0.078  | 0.071 | 1.000 | 0.999 | 395 | 0.087  | 0.094 | 1.000 | 0.666 |
| NEFA C22:3 | 511 | -2.486  | 0.878 | 1.000 | 0.922 | 519 | 0.130 | 0.066 | 1.000 | 0.745 | 499 | 0.019  | 0.690 | 1.000 | 0.999 | 355 | 0.093  | 0.103 | 1.000 | 0.666 |
| NEFA C22:4 | 661 | -47.095 | 0.001 | 0.265 | 0.013 | 674 | 0.083 | 0.174 | 1.000 | 0.745 | 643 | -0.059 | 0.150 | 1.000 | 0.999 | 460 | 0.109  | 0.034 | 1.000 | 0.650 |
| NEFA C22:5 | 662 | -43.329 | 0.003 | 0.569 | 0.020 | 675 | 0.082 | 0.174 | 1.000 | 0.745 | 643 | -0.003 | 0.949 | 1.000 | 0.999 | 460 | 0.100  | 0.048 | 1.000 | 0.666 |
| NEFA C22:6 | 661 | -71.588 | 0.000 | 0.000 | 0.000 | 674 | 0.077 | 0.196 | 1.000 | 0.754 | 642 | -0.018 | 0.648 | 1.000 | 0.999 | 460 | 0.088  | 0.081 | 1.000 | 0.666 |
| NEFA C24:1 | 631 | 3.196   | 0.829 | 1.000 | 0.897 | 642 | 0.062 | 0.319 | 1.000 | 0.865 | 614 | 0.056  | 0.163 | 1.000 | 0.999 | 435 | 0.130  | 0.007 | 1.000 | 0.588 |
| NEFA C24:2 | 482 | -44.641 | 0.010 | 1.000 | 0.048 | 489 | 0.097 | 0.175 | 1.000 | 0.745 | 469 | 0.076  | 0.123 | 1.000 | 0.999 | 335 | 0.063  | 0.283 | 1.000 | 0.907 |
| NEFA C24:3 | 507 | -5.199  | 0.750 | 1.000 | 0.861 | 511 | 0.214 | 0.002 | 0.402 | 0.201 | 484 | 0.053  | 0.267 | 1.000 | 0.999 | 355 | 0.095  | 0.079 | 1.000 | 0.666 |
| NEFA C24:4 | 662 | -48.046 | 0.001 | 0.213 | 0.011 | 675 | 0.161 | 0.008 | 1.000 | 0.408 | 643 | 0.043  | 0.295 | 1.000 | 0.999 | 460 | 0.126  | 0.012 | 1.000 | 0.588 |
| NEFA C26:0 | 556 | -24.808 | 0.103 | 1.000 | 0.272 | 559 | 0.165 | 0.010 | 1.000 | 0.408 | 532 | 0.098  | 0.020 | 1.000 | 0.999 | 379 | -0.007 | 0.889 | 1.000 | 0.963 |
| NEFA C26:3 | 568 | 4.898   | 0.756 | 1.000 | 0.864 | 585 | 0.186 | 0.004 | 0.792 | 0.264 | 557 | 0.014  | 0.749 | 1.000 | 0.999 | 394 | 0.047  | 0.361 | 1.000 | 0.907 |

Hellmuth et al.: Cord Blood Metabolome Is Highly Associated with Birth Weight, but Less Predictive for Later Weight Development

|            |     |         |       |       |       |     |        |       |       |       |     |        |       |       |       |     |        |       |       |       |
|------------|-----|---------|-------|-------|-------|-----|--------|-------|-------|-------|-----|--------|-------|-------|-------|-----|--------|-------|-------|-------|
| NEFA C26:4 | 470 | -38.333 | 0.029 | 1.000 | 0.109 | 484 | 0.155  | 0.034 | 1.000 | 0.745 | 459 | 0.073  | 0.129 | 1.000 | 0.999 | 333 | 0.081  | 0.163 | 1.000 | 0.666 |
| Orn        | 661 | -6.269  | 0.657 | 1.000 | 0.812 | 674 | 0.050  | 0.378 | 1.000 | 0.901 | 643 | 0.049  | 0.199 | 1.000 | 0.999 | 459 | 0.030  | 0.532 | 1.000 | 0.963 |
| PCa C28:2  | 518 | -9.446  | 0.533 | 1.000 | 0.729 | 516 | 0.017  | 0.790 | 1.000 | 0.936 | 496 | 0.024  | 0.564 | 1.000 | 0.999 | 347 | 0.031  | 0.552 | 1.000 | 0.963 |
| PCa C30:0  | 662 | -1.754  | 0.903 | 1.000 | 0.939 | 674 | -0.032 | 0.597 | 1.000 | 0.911 | 642 | 0.039  | 0.336 | 1.000 | 0.999 | 459 | 0.030  | 0.553 | 1.000 | 0.963 |
| PCa C30:2  | 633 | -13.090 | 0.365 | 1.000 | 0.598 | 641 | 0.012  | 0.846 | 1.000 | 0.950 | 609 | 0.030  | 0.464 | 1.000 | 0.999 | 433 | 0.066  | 0.164 | 1.000 | 0.666 |
| PCa C32:0  | 664 | -26.425 | 0.070 | 1.000 | 0.206 | 676 | 0.016  | 0.792 | 1.000 | 0.936 | 644 | 0.007  | 0.866 | 1.000 | 0.999 | 461 | 0.049  | 0.319 | 1.000 | 0.907 |
| PCa C32:1  | 662 | 44.354  | 0.002 | 0.452 | 0.017 | 674 | -0.078 | 0.187 | 1.000 | 0.745 | 642 | -0.030 | 0.449 | 1.000 | 0.999 | 460 | -0.005 | 0.921 | 1.000 | 0.964 |
| PCa C32:2  | 658 | 9.180   | 0.533 | 1.000 | 0.729 | 671 | -0.044 | 0.475 | 1.000 | 0.901 | 638 | 0.036  | 0.391 | 1.000 | 0.999 | 457 | 0.027  | 0.604 | 1.000 | 0.963 |
| PCa C32:3  | 655 | 28.481  | 0.047 | 1.000 | 0.158 | 665 | -0.015 | 0.802 | 1.000 | 0.936 | 632 | -0.017 | 0.675 | 1.000 | 0.999 | 449 | 0.010  | 0.824 | 1.000 | 0.963 |
| PCa C34:1  | 663 | 20.453  | 0.157 | 1.000 | 0.376 | 675 | -0.017 | 0.769 | 1.000 | 0.936 | 643 | 0.005  | 0.901 | 1.000 | 0.999 | 460 | 0.011  | 0.809 | 1.000 | 0.963 |
| PCa C34:2  | 661 | -18.039 | 0.203 | 1.000 | 0.451 | 673 | -0.021 | 0.729 | 1.000 | 0.935 | 641 | 0.006  | 0.878 | 1.000 | 0.999 | 458 | -0.008 | 0.864 | 1.000 | 0.963 |
| PCa C34:3  | 663 | 11.397  | 0.425 | 1.000 | 0.645 | 675 | -0.078 | 0.189 | 1.000 | 0.745 | 643 | -0.039 | 0.341 | 1.000 | 0.999 | 460 | -0.034 | 0.487 | 1.000 | 0.963 |
| PCa C34:4  | 662 | 11.976  | 0.390 | 1.000 | 0.627 | 673 | -0.096 | 0.095 | 1.000 | 0.745 | 642 | -0.031 | 0.418 | 1.000 | 0.999 | 459 | -0.041 | 0.374 | 1.000 | 0.907 |
| PCa C34:5  | 447 | 9.183   | 0.581 | 1.000 | 0.766 | 455 | -0.047 | 0.488 | 1.000 | 0.901 | 437 | -0.044 | 0.344 | 1.000 | 0.999 | 303 | 0.013  | 0.823 | 1.000 | 0.963 |
| PCa C36:1  | 661 | 21.509  | 0.132 | 1.000 | 0.325 | 673 | -0.032 | 0.586 | 1.000 | 0.911 | 641 | 0.012  | 0.756 | 1.000 | 0.999 | 458 | -0.011 | 0.821 | 1.000 | 0.963 |
| PCa C36:2  | 660 | -7.236  | 0.603 | 1.000 | 0.774 | 672 | -0.035 | 0.548 | 1.000 | 0.911 | 640 | 0.022  | 0.586 | 1.000 | 0.999 | 457 | -0.009 | 0.856 | 1.000 | 0.963 |
| PCa C36:3  | 661 | 47.385  | 0.001 | 0.195 | 0.010 | 673 | -0.051 | 0.392 | 1.000 | 0.901 | 641 | -0.006 | 0.885 | 1.000 | 0.999 | 458 | 0.011  | 0.820 | 1.000 | 0.963 |
| PCa C36:4  | 662 | -14.383 | 0.317 | 1.000 | 0.583 | 674 | -0.031 | 0.592 | 1.000 | 0.911 | 642 | -0.011 | 0.782 | 1.000 | 0.999 | 459 | 0.015  | 0.763 | 1.000 | 0.963 |
| PCa C36:5  | 663 | -47.541 | 0.001 | 0.179 | 0.010 | 675 | -0.030 | 0.622 | 1.000 | 0.916 | 643 | 0.005  | 0.901 | 1.000 | 0.999 | 460 | -0.021 | 0.678 | 1.000 | 0.963 |
| PCa C36:6  | 609 | -13.877 | 0.332 | 1.000 | 0.583 | 615 | -0.077 | 0.183 | 1.000 | 0.745 | 589 | 0.063  | 0.108 | 1.000 | 0.999 | 419 | -0.058 | 0.228 | 1.000 | 0.792 |
| PCa C38:0  | 659 | -22.016 | 0.119 | 1.000 | 0.307 | 670 | -0.094 | 0.110 | 1.000 | 0.745 | 638 | -0.006 | 0.883 | 1.000 | 0.999 | 456 | -0.075 | 0.115 | 1.000 | 0.666 |
| PCa C38:2  | 555 | -6.099  | 0.682 | 1.000 | 0.822 | 565 | 0.078  | 0.214 | 1.000 | 0.760 | 540 | 0.015  | 0.709 | 1.000 | 0.999 | 376 | 0.027  | 0.588 | 1.000 | 0.963 |
| PCa C38:3  | 661 | 28.131  | 0.046 | 1.000 | 0.156 | 673 | -0.043 | 0.463 | 1.000 | 0.901 | 641 | -0.012 | 0.770 | 1.000 | 0.999 | 458 | 0.007  | 0.893 | 1.000 | 0.963 |
| PCa C38:4  | 662 | -28.640 | 0.044 | 1.000 | 0.153 | 674 | -0.034 | 0.559 | 1.000 | 0.911 | 642 | -0.004 | 0.923 | 1.000 | 0.999 | 460 | 0.036  | 0.457 | 1.000 | 0.963 |
| PCa C38:5  | 659 | 4.961   | 0.733 | 1.000 | 0.854 | 671 | -0.035 | 0.553 | 1.000 | 0.911 | 639 | 0.010  | 0.802 | 1.000 | 0.999 | 458 | -0.015 | 0.767 | 1.000 | 0.963 |
| PCa C38:6  | 661 | -32.993 | 0.026 | 1.000 | 0.101 | 672 | -0.067 | 0.264 | 1.000 | 0.790 | 640 | 0.006  | 0.893 | 1.000 | 0.999 | 458 | -0.011 | 0.825 | 1.000 | 0.963 |

|                        |                                            |
|------------------------|--------------------------------------------|
| Obes Facts             |                                            |
| DOI: 10.1159/000453001 | © 2017 The Author(s)<br>www.karger.com/ofa |

Hellmuth et al.: Cord Blood Metabolome Is Highly Associated with Birth Weight, but Less Predictive for Later Weight Development

|            |     |         |       |       |       |     |        |       |       |       |     |        |       |       |       |     |        |       |       |       |
|------------|-----|---------|-------|-------|-------|-----|--------|-------|-------|-------|-----|--------|-------|-------|-------|-----|--------|-------|-------|-------|
| PCa C40:0  | 522 | -14.856 | 0.352 | 1.000 | 0.589 | 525 | -0.044 | 0.513 | 1.000 | 0.901 | 506 | -0.039 | 0.369 | 1.000 | 0.999 | 351 | -0.080 | 0.128 | 1.000 | 0.666 |
| PCa C40:4  | 633 | 5.877   | 0.684 | 1.000 | 0.822 | 644 | 0.037  | 0.544 | 1.000 | 0.911 | 616 | -0.019 | 0.640 | 1.000 | 0.999 | 437 | 0.000  | 0.992 | 1.000 | 0.993 |
| PCa C40:5  | 663 | 33.473  | 0.018 | 1.000 | 0.076 | 675 | -0.054 | 0.358 | 1.000 | 0.901 | 643 | 0.001  | 0.980 | 1.000 | 0.999 | 460 | -0.019 | 0.694 | 1.000 | 0.963 |
| PCa C40:6  | 663 | -29.050 | 0.052 | 1.000 | 0.168 | 674 | -0.043 | 0.479 | 1.000 | 0.901 | 642 | -0.003 | 0.945 | 1.000 | 0.999 | 460 | -0.018 | 0.723 | 1.000 | 0.963 |
| PCa C42:0  | 452 | -29.509 | 0.087 | 1.000 | 0.238 | 452 | 0.005  | 0.945 | 1.000 | 0.974 | 440 | -0.057 | 0.231 | 1.000 | 0.999 | 308 | -0.022 | 0.697 | 1.000 | 0.963 |
| PCa C42:1  | 345 | -55.379 | 0.006 | 1.000 | 0.036 | 354 | -0.006 | 0.942 | 1.000 | 0.974 | 343 | -0.017 | 0.762 | 1.000 | 0.999 | 237 | -0.098 | 0.155 | 1.000 | 0.666 |
| PCa C42:5  | 356 | -33.186 | 0.069 | 1.000 | 0.206 | 351 | 0.028  | 0.724 | 1.000 | 0.934 | 342 | -0.032 | 0.542 | 1.000 | 0.999 | 239 | -0.157 | 0.012 | 1.000 | 0.588 |
| PCa C43:6  | 627 | -13.173 | 0.366 | 1.000 | 0.598 | 636 | 0.027  | 0.662 | 1.000 | 0.918 | 607 | -0.031 | 0.449 | 1.000 | 0.999 | 430 | -0.013 | 0.786 | 1.000 | 0.963 |
| PCa C44:12 | 625 | 4.658   | 0.742 | 1.000 | 0.857 | 636 | -0.044 | 0.462 | 1.000 | 0.901 | 608 | -0.077 | 0.050 | 1.000 | 0.999 | 432 | -0.032 | 0.493 | 1.000 | 0.963 |
| PCe C32:0  | 664 | 17.392  | 0.213 | 1.000 | 0.464 | 676 | -0.002 | 0.974 | 1.000 | 0.983 | 644 | 0.029  | 0.456 | 1.000 | 0.999 | 461 | -0.013 | 0.785 | 1.000 | 0.963 |
| PCe C32:1  | 664 | -0.778  | 0.957 | 1.000 | 0.971 | 676 | -0.016 | 0.789 | 1.000 | 0.936 | 644 | 0.001  | 0.981 | 1.000 | 0.999 | 461 | -0.014 | 0.779 | 1.000 | 0.963 |
| PCe C32:2  | 633 | -9.194  | 0.521 | 1.000 | 0.726 | 642 | -0.084 | 0.157 | 1.000 | 0.745 | 609 | 0.014  | 0.733 | 1.000 | 0.999 | 434 | -0.006 | 0.902 | 1.000 | 0.963 |
| PCe C34:0  | 664 | -14.632 | 0.304 | 1.000 | 0.581 | 676 | -0.087 | 0.140 | 1.000 | 0.745 | 644 | 0.002  | 0.958 | 1.000 | 0.999 | 461 | -0.010 | 0.831 | 1.000 | 0.963 |
| PCe C34:1  | 663 | 17.413  | 0.224 | 1.000 | 0.468 | 674 | -0.018 | 0.761 | 1.000 | 0.936 | 642 | -0.006 | 0.882 | 1.000 | 0.999 | 459 | -0.007 | 0.893 | 1.000 | 0.963 |
| PCe C34:2  | 662 | -5.913  | 0.680 | 1.000 | 0.822 | 674 | -0.019 | 0.755 | 1.000 | 0.936 | 642 | 0.007  | 0.856 | 1.000 | 0.999 | 459 | -0.017 | 0.738 | 1.000 | 0.963 |
| PCe C34:3  | 662 | -44.863 | 0.002 | 0.319 | 0.013 | 674 | 0.011  | 0.852 | 1.000 | 0.950 | 642 | -0.043 | 0.291 | 1.000 | 0.999 | 459 | -0.045 | 0.363 | 1.000 | 0.907 |
| PCe C34:4  | 559 | -6.042  | 0.698 | 1.000 | 0.829 | 567 | -0.029 | 0.659 | 1.000 | 0.918 | 541 | 0.065  | 0.148 | 1.000 | 0.999 | 387 | -0.115 | 0.025 | 1.000 | 0.588 |
| PCe C36:0  | 537 | 0.693   | 0.964 | 1.000 | 0.973 | 545 | -0.141 | 0.031 | 1.000 | 0.745 | 522 | 0.009  | 0.826 | 1.000 | 0.999 | 363 | -0.013 | 0.811 | 1.000 | 0.963 |
| PCe C36:1  | 662 | -14.534 | 0.306 | 1.000 | 0.581 | 674 | -0.015 | 0.800 | 1.000 | 0.936 | 642 | 0.019  | 0.633 | 1.000 | 0.999 | 459 | -0.029 | 0.542 | 1.000 | 0.963 |
| PCe C36:2  | 661 | -21.922 | 0.125 | 1.000 | 0.317 | 673 | -0.032 | 0.593 | 1.000 | 0.911 | 641 | 0.030  | 0.452 | 1.000 | 0.999 | 458 | -0.044 | 0.384 | 1.000 | 0.907 |
| PCe C36:3  | 660 | 28.623  | 0.043 | 1.000 | 0.151 | 672 | -0.011 | 0.852 | 1.000 | 0.950 | 640 | 0.002  | 0.966 | 1.000 | 0.999 | 458 | -0.061 | 0.204 | 1.000 | 0.747 |
| PCe C36:4  | 662 | 13.484  | 0.343 | 1.000 | 0.583 | 674 | 0.000  | 1.000 | 1.000 | 1.000 | 642 | -0.028 | 0.483 | 1.000 | 0.999 | 459 | -0.014 | 0.771 | 1.000 | 0.963 |
| PCe C36:5  | 662 | -25.435 | 0.074 | 1.000 | 0.214 | 674 | -0.006 | 0.922 | 1.000 | 0.974 | 642 | -0.017 | 0.670 | 1.000 | 0.999 | 459 | -0.016 | 0.741 | 1.000 | 0.963 |
| PCe C36:6  | 378 | -4.469  | 0.801 | 1.000 | 0.879 | 379 | -0.053 | 0.501 | 1.000 | 0.901 | 366 | -0.017 | 0.719 | 1.000 | 0.999 | 255 | -0.022 | 0.733 | 1.000 | 0.963 |
| PCe C38:0  | 660 | -59.374 | 0.000 | 0.004 | 0.000 | 671 | -0.090 | 0.123 | 1.000 | 0.745 | 639 | -0.013 | 0.746 | 1.000 | 0.999 | 458 | -0.004 | 0.940 | 1.000 | 0.968 |
| PCe C38:2  | 652 | -7.242  | 0.608 | 1.000 | 0.775 | 663 | -0.053 | 0.365 | 1.000 | 0.901 | 632 | 0.013  | 0.731 | 1.000 | 0.999 | 452 | -0.050 | 0.287 | 1.000 | 0.907 |

|                        |                                            |
|------------------------|--------------------------------------------|
| Obes Facts             |                                            |
| DOI: 10.1159/000453001 | © 2017 The Author(s)<br>www.karger.com/ofa |

Hellmuth et al.: Cord Blood Metabolome Is Highly Associated with Birth Weight, but Less Predictive for Later Weight Development

|           |     |         |       |       |       |     |        |       |       |       |     |        |       |       |       |     |        |       |       |       |
|-----------|-----|---------|-------|-------|-------|-----|--------|-------|-------|-------|-----|--------|-------|-------|-------|-----|--------|-------|-------|-------|
| PCe C38:3 | 654 | -29.921 | 0.031 | 1.000 | 0.115 | 666 | -0.025 | 0.668 | 1.000 | 0.918 | 634 | 0.020  | 0.599 | 1.000 | 0.999 | 453 | -0.031 | 0.522 | 1.000 | 0.963 |
| PCe C38:4 | 661 | -13.898 | 0.329 | 1.000 | 0.583 | 673 | 0.004  | 0.948 | 1.000 | 0.974 | 641 | -0.018 | 0.652 | 1.000 | 0.999 | 459 | -0.044 | 0.360 | 1.000 | 0.907 |
| PCe C38:5 | 661 | 4.123   | 0.770 | 1.000 | 0.865 | 673 | -0.002 | 0.978 | 1.000 | 0.983 | 641 | -0.014 | 0.721 | 1.000 | 0.999 | 458 | -0.035 | 0.465 | 1.000 | 0.963 |
| PCe C38:6 | 662 | -24.655 | 0.084 | 1.000 | 0.235 | 674 | -0.030 | 0.606 | 1.000 | 0.916 | 642 | -0.002 | 0.954 | 1.000 | 0.999 | 460 | -0.049 | 0.300 | 1.000 | 0.907 |
| PCe C40:0 | 661 | -30.788 | 0.035 | 1.000 | 0.126 | 671 | -0.015 | 0.803 | 1.000 | 0.936 | 640 | 0.009  | 0.822 | 1.000 | 0.999 | 459 | 0.033  | 0.506 | 1.000 | 0.963 |
| PCe C40:1 | 577 | 1.473   | 0.920 | 1.000 | 0.948 | 583 | -0.016 | 0.793 | 1.000 | 0.936 | 562 | 0.016  | 0.688 | 1.000 | 0.999 | 394 | 0.080  | 0.106 | 1.000 | 0.666 |
| PCe C40:3 | 517 | -22.241 | 0.159 | 1.000 | 0.376 | 526 | -0.076 | 0.245 | 1.000 | 0.775 | 509 | 0.000  | 0.999 | 1.000 | 0.999 | 355 | -0.083 | 0.117 | 1.000 | 0.666 |
| PCe C40:4 | 658 | -36.661 | 0.011 | 1.000 | 0.051 | 668 | -0.028 | 0.631 | 1.000 | 0.916 | 636 | -0.015 | 0.704 | 1.000 | 0.999 | 454 | -0.038 | 0.424 | 1.000 | 0.943 |
| PCe C40:5 | 656 | -30.143 | 0.030 | 1.000 | 0.112 | 669 | -0.021 | 0.714 | 1.000 | 0.932 | 637 | -0.055 | 0.153 | 1.000 | 0.999 | 456 | -0.038 | 0.406 | 1.000 | 0.923 |
| PCe C40:6 | 660 | -52.871 | 0.000 | 0.071 | 0.004 | 672 | -0.032 | 0.593 | 1.000 | 0.911 | 640 | 0.002  | 0.953 | 1.000 | 0.999 | 459 | -0.073 | 0.132 | 1.000 | 0.666 |
| PCe C42:1 | 370 | -26.645 | 0.160 | 1.000 | 0.376 | 376 | 0.008  | 0.920 | 1.000 | 0.974 | 364 | -0.018 | 0.724 | 1.000 | 0.999 | 255 | -0.134 | 0.041 | 1.000 | 0.661 |
| PCe C42:2 | 528 | -16.855 | 0.265 | 1.000 | 0.536 | 536 | -0.070 | 0.268 | 1.000 | 0.790 | 516 | -0.025 | 0.527 | 1.000 | 0.999 | 363 | -0.025 | 0.632 | 1.000 | 0.963 |
| PCe C42:3 | 450 | -18.168 | 0.269 | 1.000 | 0.536 | 450 | 0.004  | 0.951 | 1.000 | 0.974 | 438 | -0.004 | 0.928 | 1.000 | 0.999 | 305 | 0.007  | 0.900 | 1.000 | 0.963 |
| PCe C42:4 | 611 | -28.067 | 0.061 | 1.000 | 0.188 | 620 | 0.048  | 0.457 | 1.000 | 0.901 | 593 | -0.063 | 0.127 | 1.000 | 0.999 | 418 | -0.080 | 0.131 | 1.000 | 0.666 |
| PCe C42:5 | 583 | -14.654 | 0.340 | 1.000 | 0.583 | 588 | -0.026 | 0.700 | 1.000 | 0.932 | 566 | -0.063 | 0.132 | 1.000 | 0.999 | 397 | -0.045 | 0.396 | 1.000 | 0.908 |
| PCe C42:6 | 598 | -41.759 | 0.004 | 0.927 | 0.029 | 607 | -0.021 | 0.739 | 1.000 | 0.936 | 581 | -0.032 | 0.447 | 1.000 | 0.999 | 415 | -0.008 | 0.870 | 1.000 | 0.963 |
| Phe       | 663 | -19.134 | 0.181 | 1.000 | 0.415 | 676 | 0.031  | 0.597 | 1.000 | 0.911 | 644 | 0.068  | 0.083 | 1.000 | 0.999 | 461 | 0.052  | 0.304 | 1.000 | 0.907 |
| Pro       | 662 | -10.708 | 0.463 | 1.000 | 0.663 | 675 | 0.030  | 0.612 | 1.000 | 0.916 | 644 | 0.055  | 0.167 | 1.000 | 0.999 | 461 | 0.028  | 0.577 | 1.000 | 0.963 |
| Ser       | 661 | -6.123  | 0.663 | 1.000 | 0.815 | 674 | 0.029  | 0.625 | 1.000 | 0.916 | 642 | 0.026  | 0.507 | 1.000 | 0.999 | 460 | 0.042  | 0.381 | 1.000 | 0.907 |
| SM C21:2  | 433 | 15.939  | 0.362 | 1.000 | 0.598 | 433 | -0.120 | 0.105 | 1.000 | 0.745 | 418 | -0.028 | 0.574 | 1.000 | 0.999 | 287 | 0.053  | 0.391 | 1.000 | 0.907 |
| SM C30:1  | 529 | -12.681 | 0.425 | 1.000 | 0.645 | 541 | 0.030  | 0.649 | 1.000 | 0.918 | 517 | 0.044  | 0.304 | 1.000 | 0.999 | 359 | -0.022 | 0.685 | 1.000 | 0.963 |
| SM C31:1  | 363 | -2.487  | 0.900 | 1.000 | 0.939 | 368 | -0.014 | 0.864 | 1.000 | 0.951 | 357 | 0.006  | 0.914 | 1.000 | 0.999 | 249 | 0.005  | 0.938 | 1.000 | 0.968 |
| SM C32:1  | 663 | 7.516   | 0.603 | 1.000 | 0.774 | 675 | -0.011 | 0.854 | 1.000 | 0.950 | 643 | 0.018  | 0.659 | 1.000 | 0.999 | 460 | 0.017  | 0.727 | 1.000 | 0.963 |
| SM C32:2  | 662 | 32.651  | 0.022 | 1.000 | 0.090 | 674 | -0.104 | 0.079 | 1.000 | 0.745 | 642 | 0.045  | 0.270 | 1.000 | 0.999 | 460 | 0.071  | 0.143 | 1.000 | 0.666 |
| SM C33:1  | 662 | -0.003  | 1.000 | 1.000 | 1.000 | 674 | -0.016 | 0.783 | 1.000 | 0.936 | 642 | 0.034  | 0.399 | 1.000 | 0.999 | 459 | -0.032 | 0.525 | 1.000 | 0.963 |
| SM C34:0  | 658 | 11.115  | 0.437 | 1.000 | 0.656 | 668 | -0.005 | 0.936 | 1.000 | 0.974 | 635 | 0.028  | 0.482 | 1.000 | 0.999 | 452 | 0.044  | 0.351 | 1.000 | 0.907 |

|                        |                                            |
|------------------------|--------------------------------------------|
| Obes Facts             |                                            |
| DOI: 10.1159/000453001 | © 2017 The Author(s)<br>www.karger.com/ofa |

Hellmuth et al.: Cord Blood Metabolome Is Highly Associated with Birth Weight, but Less Predictive for Later Weight Development

|          |     |         |       |       |       |     |        |       |       |       |     |        |       |       |       |     |        |       |       |       |
|----------|-----|---------|-------|-------|-------|-----|--------|-------|-------|-------|-----|--------|-------|-------|-------|-----|--------|-------|-------|-------|
| SM C34:1 | 662 | -12.012 | 0.403 | 1.000 | 0.632 | 674 | 0.009  | 0.883 | 1.000 | 0.966 | 642 | 0.002  | 0.962 | 1.000 | 0.999 | 459 | 0.013  | 0.783 | 1.000 | 0.963 |
| SM C34:2 | 664 | 17.751  | 0.216 | 1.000 | 0.465 | 676 | -0.040 | 0.495 | 1.000 | 0.901 | 644 | 0.003  | 0.944 | 1.000 | 0.999 | 461 | 0.047  | 0.323 | 1.000 | 0.907 |
| SM C35:1 | 662 | -15.629 | 0.269 | 1.000 | 0.536 | 674 | -0.046 | 0.431 | 1.000 | 0.901 | 642 | 0.035  | 0.374 | 1.000 | 0.999 | 459 | -0.011 | 0.820 | 1.000 | 0.963 |
| SM C35:2 | 579 | 3.675   | 0.808 | 1.000 | 0.879 | 589 | -0.027 | 0.664 | 1.000 | 0.918 | 563 | 0.015  | 0.721 | 1.000 | 0.999 | 400 | 0.011  | 0.831 | 1.000 | 0.963 |
| SM C36:0 | 460 | 24.275  | 0.157 | 1.000 | 0.376 | 464 | 0.021  | 0.765 | 1.000 | 0.936 | 443 | 0.066  | 0.158 | 1.000 | 0.999 | 315 | 0.080  | 0.143 | 1.000 | 0.666 |
| SM C36:1 | 663 | 6.101   | 0.675 | 1.000 | 0.822 | 675 | -0.004 | 0.945 | 1.000 | 0.974 | 643 | -0.004 | 0.931 | 1.000 | 0.999 | 460 | 0.009  | 0.850 | 1.000 | 0.963 |
| SM C36:2 | 664 | 15.862  | 0.276 | 1.000 | 0.540 | 676 | -0.035 | 0.561 | 1.000 | 0.911 | 644 | -0.011 | 0.785 | 1.000 | 0.999 | 461 | 0.033  | 0.492 | 1.000 | 0.963 |
| SM C36:3 | 611 | 2.510   | 0.864 | 1.000 | 0.914 | 621 | -0.095 | 0.128 | 1.000 | 0.745 | 594 | 0.014  | 0.726 | 1.000 | 0.999 | 421 | -0.024 | 0.624 | 1.000 | 0.963 |
| SM C37:2 | 401 | 9.586   | 0.583 | 1.000 | 0.766 | 405 | 0.039  | 0.580 | 1.000 | 0.911 | 387 | -0.002 | 0.974 | 1.000 | 0.999 | 272 | -0.124 | 0.025 | 1.000 | 0.588 |
| SM C37:3 | 638 | -5.025  | 0.714 | 1.000 | 0.839 | 647 | -0.039 | 0.510 | 1.000 | 0.901 | 613 | -0.010 | 0.801 | 1.000 | 0.999 | 439 | 0.033  | 0.487 | 1.000 | 0.963 |
| SM C38:1 | 555 | 15.073  | 0.327 | 1.000 | 0.583 | 567 | -0.029 | 0.647 | 1.000 | 0.918 | 538 | 0.021  | 0.617 | 1.000 | 0.999 | 381 | 0.015  | 0.770 | 1.000 | 0.963 |
| SM C38:2 | 662 | 4.224   | 0.770 | 1.000 | 0.865 | 674 | -0.032 | 0.595 | 1.000 | 0.911 | 642 | -0.016 | 0.695 | 1.000 | 0.999 | 459 | -0.019 | 0.691 | 1.000 | 0.963 |
| SM C38:3 | 653 | -7.828  | 0.579 | 1.000 | 0.766 | 663 | -0.026 | 0.660 | 1.000 | 0.918 | 631 | 0.043  | 0.290 | 1.000 | 0.999 | 448 | 0.048  | 0.333 | 1.000 | 0.907 |
| SM C39:1 | 659 | -25.316 | 0.084 | 1.000 | 0.235 | 671 | -0.050 | 0.401 | 1.000 | 0.901 | 639 | 0.005  | 0.901 | 1.000 | 0.999 | 458 | -0.043 | 0.367 | 1.000 | 0.907 |
| SM C39:4 | 466 | -21.196 | 0.196 | 1.000 | 0.439 | 477 | 0.054  | 0.433 | 1.000 | 0.901 | 456 | 0.048  | 0.292 | 1.000 | 0.999 | 318 | 0.001  | 0.979 | 1.000 | 0.988 |
| SM C39:5 | 622 | -10.285 | 0.469 | 1.000 | 0.667 | 632 | 0.077  | 0.202 | 1.000 | 0.754 | 602 | 0.035  | 0.383 | 1.000 | 0.999 | 424 | 0.022  | 0.644 | 1.000 | 0.963 |
| SM C40:1 | 609 | 13.600  | 0.351 | 1.000 | 0.589 | 621 | 0.003  | 0.960 | 1.000 | 0.979 | 589 | 0.000  | 0.993 | 1.000 | 0.999 | 421 | 0.006  | 0.909 | 1.000 | 0.963 |
| SM C40:2 | 663 | -2.418  | 0.866 | 1.000 | 0.914 | 675 | 0.015  | 0.807 | 1.000 | 0.936 | 643 | -0.047 | 0.242 | 1.000 | 0.999 | 460 | 0.009  | 0.844 | 1.000 | 0.963 |
| SM C40:3 | 403 | 6.399   | 0.735 | 1.000 | 0.854 | 414 | 0.060  | 0.397 | 1.000 | 0.901 | 389 | 0.031  | 0.564 | 1.000 | 0.999 | 276 | -0.016 | 0.792 | 1.000 | 0.963 |
| SM C40:4 | 656 | -9.813  | 0.491 | 1.000 | 0.688 | 666 | -0.045 | 0.440 | 1.000 | 0.901 | 633 | -0.012 | 0.767 | 1.000 | 0.999 | 450 | 0.034  | 0.475 | 1.000 | 0.963 |
| SM C40:5 | 597 | -45.300 | 0.002 | 0.412 | 0.016 | 608 | -0.042 | 0.487 | 1.000 | 0.901 | 579 | 0.001  | 0.971 | 1.000 | 0.999 | 407 | 0.060  | 0.220 | 1.000 | 0.780 |
| SM C41:1 | 661 | -27.542 | 0.053 | 1.000 | 0.168 | 673 | -0.039 | 0.504 | 1.000 | 0.901 | 641 | 0.030  | 0.449 | 1.000 | 0.999 | 458 | -0.033 | 0.506 | 1.000 | 0.963 |
| SM C41:2 | 662 | -22.663 | 0.111 | 1.000 | 0.290 | 674 | -0.071 | 0.226 | 1.000 | 0.768 | 642 | 0.024  | 0.550 | 1.000 | 0.999 | 459 | -0.047 | 0.333 | 1.000 | 0.907 |
| SM C41:5 | 506 | 2.772   | 0.857 | 1.000 | 0.914 | 518 | 0.050  | 0.446 | 1.000 | 0.901 | 493 | -0.026 | 0.550 | 1.000 | 0.999 | 345 | 0.077  | 0.156 | 1.000 | 0.666 |
| SM C42:1 | 663 | -13.435 | 0.343 | 1.000 | 0.583 | 675 | 0.040  | 0.500 | 1.000 | 0.901 | 643 | 0.032  | 0.423 | 1.000 | 0.999 | 460 | 0.021  | 0.659 | 1.000 | 0.963 |
| SM C42:2 | 660 | -8.395  | 0.556 | 1.000 | 0.750 | 672 | -0.003 | 0.966 | 1.000 | 0.980 | 640 | 0.017  | 0.668 | 1.000 | 0.999 | 457 | 0.024  | 0.621 | 1.000 | 0.963 |

|                        |                                            |
|------------------------|--------------------------------------------|
| Obes Facts             |                                            |
| DOI: 10.1159/000453001 | © 2017 The Author(s)<br>www.karger.com/ofa |

Hellmuth et al.: Cord Blood Metabolome Is Highly Associated with Birth Weight, but Less Predictive for Later Weight Development

|          |     |         |       |       |       |     |        |       |       |       |     |        |       |       |       |     |        |       |       |       |
|----------|-----|---------|-------|-------|-------|-----|--------|-------|-------|-------|-----|--------|-------|-------|-------|-----|--------|-------|-------|-------|
| SM C42:3 | 664 | 8.085   | 0.570 | 1.000 | 0.764 | 676 | 0.041  | 0.485 | 1.000 | 0.901 | 644 | -0.001 | 0.988 | 1.000 | 0.999 | 461 | 0.066  | 0.152 | 1.000 | 0.666 |
| SM C42:4 | 436 | -46.759 | 0.008 | 1.000 | 0.041 | 441 | 0.063  | 0.364 | 1.000 | 0.901 | 419 | 0.025  | 0.618 | 1.000 | 0.999 | 298 | 0.035  | 0.543 | 1.000 | 0.963 |
| SM C42:5 | 392 | -8.544  | 0.638 | 1.000 | 0.800 | 404 | 0.029  | 0.689 | 1.000 | 0.930 | 384 | 0.008  | 0.872 | 1.000 | 0.999 | 265 | 0.002  | 0.973 | 1.000 | 0.988 |
| SM C42:6 | 656 | -24.192 | 0.094 | 1.000 | 0.256 | 665 | -0.076 | 0.200 | 1.000 | 0.754 | 632 | -0.008 | 0.840 | 1.000 | 0.999 | 450 | -0.033 | 0.507 | 1.000 | 0.963 |
| SM C43:0 | 321 | -52.855 | 0.008 | 1.000 | 0.040 | 322 | -0.074 | 0.394 | 1.000 | 0.901 | 313 | 0.001  | 0.978 | 1.000 | 0.999 | 212 | -0.116 | 0.080 | 1.000 | 0.666 |
| SM C43:2 | 624 | -12.404 | 0.385 | 1.000 | 0.623 | 635 | 0.005  | 0.938 | 1.000 | 0.974 | 607 | 0.027  | 0.493 | 1.000 | 0.999 | 431 | 0.000  | 0.993 | 1.000 | 0.993 |
| SM C44:6 | 406 | -33.193 | 0.051 | 1.000 | 0.168 | 404 | -0.080 | 0.265 | 1.000 | 0.790 | 388 | -0.051 | 0.276 | 1.000 | 0.999 | 272 | -0.059 | 0.308 | 1.000 | 0.907 |
| Thr      | 661 | 17.174  | 0.231 | 1.000 | 0.478 | 674 | 0.010  | 0.862 | 1.000 | 0.951 | 642 | 0.000  | 0.999 | 1.000 | 0.999 | 460 | 0.044  | 0.355 | 1.000 | 0.907 |
| Trp      | 658 | 11.645  | 0.426 | 1.000 | 0.645 | 671 | 0.042  | 0.492 | 1.000 | 0.901 | 639 | 0.060  | 0.148 | 1.000 | 0.999 | 457 | 0.073  | 0.149 | 1.000 | 0.666 |
| Tyr      | 660 | -3.012  | 0.837 | 1.000 | 0.902 | 673 | 0.064  | 0.282 | 1.000 | 0.797 | 641 | 0.113  | 0.005 | 0.970 | 0.970 | 459 | 0.061  | 0.208 | 1.000 | 0.748 |
| Val      | 659 | -13.844 | 0.337 | 1.000 | 0.583 | 672 | 0.022  | 0.714 | 1.000 | 0.932 | 640 | 0.058  | 0.146 | 1.000 | 0.999 | 459 | 0.082  | 0.089 | 1.000 | 0.666 |

Hellmuth et al.: Cord Blood Metabolome Is Highly Associated with Birth Weight, but Less Predictive for Later Weight Development

**Supplemental table 3 Sex stratified** analysis for birthweight. The associations between metabolite concentrations in cord blood and birth weight were determined using linear regression models adjusted for study center, sex, gestational age, maternal smoking during the third trimester, maternal pre pregnancy BMI, maternal weight gain during pregnancy and maternal education (defined as low: less than 10 years, medium=10 years and high: more than 10 years of education).

|          | Birth weight_Girls |              |             |        |             | Birth weight_Boys |              |             |        |             |
|----------|--------------------|--------------|-------------|--------|-------------|-------------------|--------------|-------------|--------|-------------|
|          | N                  | $\beta$      | p           | p bonf | p fdr       | N                 | $\beta$      | p           | p bonf | p fdr       |
| Ala      | 307                | -127.3326536 | 0.036583965 | 1      | 0.193694364 | 354               | -93.73213777 | 0.074096683 | 1      | 0.418546131 |
| Arg      | 308                | 39.3315306   | 0.215525366 | 1      | 0.472042638 | 354               | 24.15210429  | 0.369439783 | 1      | 0.735361092 |
| Asn      | 308                | -69.60892886 | 0.22155861  | 1      | 0.472507648 | 354               | 7.939297075  | 0.868857094 | 1      | 0.954240085 |
| Asp      | 306                | -59.45173308 | 0.077643801 | 1      | 0.261734749 | 353               | 4.452370025  | 0.890323634 | 1      | 0.954240085 |
| C14:0    | 307                | -100.916754  | 0.145712734 | 1      | 0.395505993 | 345               | -97.47077318 | 0.091534031 | 1      | 0.464499245 |
| C15:1    | 306                | -29.71304996 | 0.478711368 | 1      | 0.709579262 | 348               | -17.61570555 | 0.601961052 | 1      | 0.870238161 |
| C16:0    | 309                | 80.28341159  | 0.41777425  | 1      | 0.646437724 | 353               | -67.7815065  | 0.420410837 | 1      | 0.770195218 |
| C16:1 n7 | 310                | 34.54871718  | 0.60962073  | 1      | 0.784054455 | 353               | -43.44765936 | 0.429191282 | 1      | 0.770195218 |
| C17:0    | 303                | -166.8197693 | 0.010815829 | 1      | 0.095630123 | 348               | -132.287287  | 0.016260348 | 1      | 0.17886383  |
| C18:0    | 309                | 21.58160598  | 0.822887844 | 1      | 0.914806167 | 353               | -53.64359391 | 0.525565565 | 1      | 0.833598357 |
| C18:1 n7 | 310                | 128.6846646  | 0.112674968 | 1      | 0.32307275  | 353               | 11.23116766  | 0.872543624 | 1      | 0.954240085 |
| C18:1 n9 | 309                | 119.4108012  | 0.216823413 | 1      | 0.472042638 | 352               | -34.29347776 | 0.665965112 | 1      | 0.870238161 |

Hellmuth et al.: Cord Blood Metabolome Is Highly Associated with Birth Weight, but Less Predictive for Later Weight Development

|          |     |              |             |             |   |             |     |              |             |             |   |             |
|----------|-----|--------------|-------------|-------------|---|-------------|-----|--------------|-------------|-------------|---|-------------|
| C18:2 n6 | 309 | -69.6388831  | 0.342043792 |             | 1 | 0.616268557 | 353 | -166.1895635 | 0.005821016 |             | 1 | 0.076037022 |
| C18:3 n3 | 300 | -86.18616739 | 0.016013937 |             | 1 | 0.119532599 | 347 | -84.37389458 | 0.004411739 | 0.922053458 |   | 0.061470231 |
| C18:3 n6 | 302 | -10.84746192 | 0.84439268  |             | 1 | 0.915052585 | 349 | -33.39479847 | 0.475336069 |             | 1 | 0.814305233 |
| C20:1 n9 | 292 | -21.40548183 | 0.590180371 |             | 1 | 0.784054455 | 333 | -32.15401139 | 0.375093164 |             | 1 | 0.739570484 |
| C20:2 n6 | 302 | 26.91238641  | 0.618990359 |             | 1 | 0.784054455 | 347 | 25.08221237  | 0.598343232 |             | 1 | 0.870238161 |
| C20:3 n3 | 299 | -58.79386409 | 0.249551013 |             | 1 | 0.50656786  | 344 | 8.964407843  | 0.835692853 |             | 1 | 0.954240085 |
| C20:3 n6 | 309 | 176.6425622  | 0.010799625 |             | 1 | 0.095630123 | 352 | 98.08196402  | 0.095960748 |             | 1 | 0.464499245 |
| C20:3 n9 | 310 | 167.3663465  | 9.99E-08    | 2.09E-05    |   | 5.22E-06    | 353 | 163.4610229  | 2.14E-07    | 4.47E-05    |   | 1.49E-05    |
| C20:4 n6 | 310 | 37.97901337  | 0.655464622 |             | 1 | 0.791861884 | 352 | -107.6650358 | 0.155996884 |             | 1 | 0.537968259 |
| C20:5 n3 | 307 | -82.77486714 | 0.020980969 |             | 1 | 0.13715618  | 351 | -53.78588382 | 0.111337569 |             | 1 | 0.470508494 |
| C22:4 n6 | 300 | 5.046841435  | 0.941433965 |             | 1 | 0.961052504 | 345 | 5.299833417  | 0.92214657  |             | 1 | 0.962085107 |
| C22:5 n3 | 309 | -75.18124376 | 0.053736579 |             | 1 | 0.207863201 | 351 | -57.32014461 | 0.09409776  |             | 1 | 0.464499245 |
| C22:5 n6 | 310 | 213.4839054  | 1.58E-05    | 0.003298551 |   | 0.000366506 | 353 | 121.4503756  | 0.002014373 | 0.421004027 |   | 0.039938624 |
| C22:6 n3 | 310 | -98.69918389 | 0.116912357 |             | 1 | 0.330198414 | 353 | -106.1319236 | 0.060520408 |             | 1 | 0.361393296 |
| AC C10:0 | 280 | -8.916006176 | 0.845000712 |             | 1 | 0.915052585 | 328 | -60.91444243 | 0.077127185 |             | 1 | 0.424199515 |
| AC C10:1 | 271 | -22.23682436 | 0.629842047 |             | 1 | 0.787213709 | 319 | -57.96973465 | 0.113349842 |             | 1 | 0.470508494 |
| AC C12:0 | 288 | -99.09822418 | 0.010920369 |             | 1 | 0.095630123 | 332 | -27.81210247 | 0.429068716 |             | 1 | 0.770195218 |
| AC C14:1 | 307 | -22.08254848 | 0.613465401 |             | 1 | 0.784054455 | 354 | -79.96118062 | 0.025899256 |             | 1 | 0.235345416 |
| AC C16:0 | 309 | -13.5921126  | 0.713487142 |             | 1 | 0.833065993 | 354 | 1.868952483  | 0.953302154 |             | 1 | 0.969997189 |
| AC C18:1 | 292 | -33.62334872 | 0.345777877 |             | 1 | 0.617671592 | 337 | -18.29060778 | 0.56492259  |             | 1 | 0.849415981 |
| AC C2:0  | 307 | -60.69793999 | 0.182901077 |             | 1 | 0.439270879 | 353 | -134.8667384 | 0.00209693  | 0.438258392 |   | 0.039938624 |



Hellmuth et al.: Cord Blood Metabolome Is Highly Associated with Birth Weight, but Less Predictive for Later Weight Development

|            |     |              |             |             |   |             |     |              |             |             |   |             |
|------------|-----|--------------|-------------|-------------|---|-------------|-----|--------------|-------------|-------------|---|-------------|
| AC C3:0    | 307 | -8.746368264 | 0.831508485 |             | 1 | 0.915052585 | 355 | -50.95604993 | 0.195973529 |             | 1 | 0.590177482 |
| AC C8:1    | 308 | -35.46845331 | 0.207477543 |             | 1 | 0.466266737 | 354 | -49.8166368  | 0.033119741 |             | 1 | 0.269248704 |
| Cit        | 304 | -10.42209708 | 0.841229188 |             | 1 | 0.915052585 | 351 | 41.35344995  | 0.348178355 |             | 1 | 0.725556606 |
| Gln        | 302 | -0.41691112  | 0.991728505 |             | 1 | 0.991728505 | 342 | -22.30398044 | 0.503506379 |             | 1 | 0.828604985 |
| Glu        | 278 | -25.91598327 | 0.660617678 |             | 1 | 0.793500545 | 323 | 8.679070278  | 0.873522939 |             | 1 | 0.954240085 |
| Gly        | 308 | -73.74687514 | 0.239887653 |             | 1 | 0.501365196 | 355 | 54.62294843  | 0.296528077 |             | 1 | 0.666391055 |
| H1         | 297 | 13.231302    | 0.398647498 |             | 1 | 0.645870752 | 347 | 6.400443677  | 0.656033997 |             | 1 | 0.870238161 |
| His        | 308 | 73.05960631  | 0.281065525 |             | 1 | 0.538923806 | 354 | 205.0141458  | 0.000357735 | 0.074766563 |   | 0.010680938 |
| Ile        | 306 | -42.33221242 | 0.586567725 |             | 1 | 0.784054455 | 354 | 116.1184735  | 0.055420008 |             | 1 | 0.343934554 |
| Leu        | 307 | -136.4039769 | 0.077227651 |             | 1 | 0.261734749 | 354 | 51.07202478  | 0.415528246 |             | 1 | 0.770195218 |
| Lys        | 262 | -201.8102629 | 0.027457229 |             | 1 | 0.168781204 | 289 | 108.189673   | 0.134624675 |             | 1 | 0.506477044 |
| LPCa C14:0 | 308 | 154.7518016  | 0.002221274 | 0.464246273 |   | 0.033160448 | 354 | 195.3891366  | 2.05E-05    | 0.004278684 |   | 0.000855737 |
| LPCa C16:0 | 308 | 217.3468234  | 0.000502414 | 0.105004605 |   | 0.01050046  | 354 | 169.1529768  | 0.003577556 | 0.747709192 |   | 0.054384438 |
| LPCa C16:1 | 309 | 299.8938931  | 4.37E-11    | 9.12E-09    |   | 9.12E-09    | 353 | 291.635456   | 2.92E-10    | 6.09E-08    |   | 6.09E-08    |
| LPCa C18:0 | 309 | 83.7092534   | 0.112389003 |             | 1 | 0.32307275  | 354 | 65.1608845   | 0.191595121 |             | 1 | 0.590177482 |
| LPCa C18:1 | 309 | 313.8219869  | 5.25E-10    | 1.10E-07    |   | 5.49E-08    | 355 | 308.9260128  | 1.59E-09    | 3.31E-07    |   | 1.66E-07    |
| LPCa C18:2 | 306 | 235.1178679  | 5.83E-07    | 0.000121819 |   | 2.44E-05    | 355 | 140.0994494  | 0.000824102 | 0.17223726  |   | 0.021529657 |
| LPCa C18:3 | 256 | 85.57544347  | 0.01072331  |             | 1 | 0.095630123 | 299 | 117.2705279  | 0.000191751 | 0.040075921 |   | 0.00667932  |
| LPCa C20:3 | 306 | 236.613175   | 3.16E-08    | 6.60E-06    |   | 2.20E-06    | 355 | 195.7894446  | 3.47E-07    | 7.26E-05    |   | 1.81E-05    |
| LPCa C20:4 | 306 | 233.8826586  | 2.22E-06    | 0.000463275 |   | 6.62E-05    | 354 | 125.8217223  | 0.003241487 | 0.677470734 |   | 0.054384438 |
| LPCa C22:6 | 276 | 94.72755886  | 0.039637553 |             | 1 | 0.193694364 | 325 | 107.9125745  | 0.008126986 |             | 1 | 0.099914117 |

|                        |                                            |
|------------------------|--------------------------------------------|
| Obes Facts             |                                            |
| DOI: 10.1159/000453001 | © 2017 The Author(s)<br>www.karger.com/ofa |

Hellmuth et al.: Cord Blood Metabolome Is Highly Associated with Birth Weight, but Less Predictive for Later Weight Development

|            |     |              |             |   |             |     |              |             |   |             |
|------------|-----|--------------|-------------|---|-------------|-----|--------------|-------------|---|-------------|
| LPCe C16:0 | 293 | 94.61995853  | 0.02358261  | 1 | 0.149356532 | 335 | 75.98347596  | 0.046562833 | 1 | 0.324387737 |
| LPCe C18:0 | 304 | 3.040473107  | 0.942113389 | 1 | 0.961052504 | 354 | -11.8794777  | 0.735521147 | 1 | 0.893743719 |
| LPCe C18:1 | 170 | 72.41558443  | 0.15739713  | 1 | 0.416405066 | 203 | 100.253275   | 0.034783325 | 1 | 0.269248704 |
| Met        | 307 | -179.3671434 | 0.007700661 | 1 | 0.084707266 | 354 | 47.85175894  | 0.366208132 | 1 | 0.735361092 |
| Orn        | 306 | -102.3986088 | 0.040944295 | 1 | 0.193694364 | 355 | 51.73517054  | 0.215695445 | 1 | 0.607862018 |
| PCa C28:2  | 243 | -49.66448054 | 0.164770742 | 1 | 0.422484738 | 275 | 13.38144473  | 0.67453867  | 1 | 0.870238161 |
| PCa C30:0  | 308 | 3.563466579  | 0.933060215 | 1 | 0.961052504 | 354 | -18.5022806  | 0.637745479 | 1 | 0.870238161 |
| PCa C30:2  | 295 | -47.52892023 | 0.324846666 | 1 | 0.591167085 | 338 | -20.27683847 | 0.625835591 | 1 | 0.870238161 |
| PCa C32:0  | 309 | -51.21648438 | 0.312046427 | 1 | 0.577147816 | 355 | -72.93855667 | 0.104277104 | 1 | 0.470508494 |
| PCa C32:1  | 309 | 95.25922873  | 0.013447025 | 1 | 0.112417131 | 353 | 54.83508397  | 0.11637927  | 1 | 0.470508494 |
| PCa C32:2  | 307 | 62.30835498  | 0.215750818 | 1 | 0.472042638 | 351 | -9.468316994 | 0.814374146 | 1 | 0.945578869 |
| PCa C32:3  | 306 | 82.83230315  | 0.083990335 | 1 | 0.274280938 | 349 | 44.851112    | 0.283329383 | 1 | 0.658196465 |
| PCa C34:1  | 309 | 78.38476637  | 0.171886075 | 1 | 0.427668924 | 354 | 31.03894835  | 0.536506302 | 1 | 0.833598357 |
| PCa C34:2  | 307 | -12.23070746 | 0.819570937 | 1 | 0.914806167 | 354 | -58.48434854 | 0.168063117 | 1 | 0.548831116 |
| PCa C34:3  | 309 | 52.92070781  | 0.267510113 | 1 | 0.517681608 | 354 | 11.48726341  | 0.7790752   | 1 | 0.925151801 |
| PCa C34:4  | 309 | 20.18755172  | 0.636550798 | 1 | 0.787213709 | 353 | 28.65610521  | 0.431161916 | 1 | 0.770195218 |
| PCa C34:5  | 209 | 2.869120881  | 0.931273683 | 1 | 0.961052504 | 238 | 10.82054412  | 0.68679757  | 1 | 0.875248122 |
| PCa C36:1  | 307 | 75.46119724  | 0.180947264 | 1 | 0.439270879 | 354 | 41.20208895  | 0.415590689 | 1 | 0.770195218 |
| PCa C36:2  | 306 | -6.959607438 | 0.899992533 | 1 | 0.949992118 | 354 | -20.38975803 | 0.654826366 | 1 | 0.870238161 |
| PCa C36:3  | 307 | 139.0501451  | 0.01098145  | 1 | 0.095630123 | 354 | 90.36654993  | 0.044206319 | 1 | 0.318590369 |
| PCa C36:4  | 308 | 12.25140824  | 0.835310082 | 1 | 0.915052585 | 354 | -75.65678237 | 0.128463515 | 1 | 0.506477044 |

|                        |                                            |
|------------------------|--------------------------------------------|
| Obes Facts             |                                            |
| DOI: 10.1159/000453001 | © 2017 The Author(s)<br>www.karger.com/ofa |

Hellmuth et al.: Cord Blood Metabolome Is Highly Associated with Birth Weight, but Less Predictive for Later Weight Development

|            |     |              |             |   |             |     |              |             |   |             |
|------------|-----|--------------|-------------|---|-------------|-----|--------------|-------------|---|-------------|
| PCa C36:5  | 309 | -123.0150606 | 0.006737527 | 1 | 0.078230175 | 354 | -60.5166899  | 0.106904704 | 1 | 0.470508494 |
| PCa C36:6  | 288 | -18.36260791 | 0.571818696 | 1 | 0.781111814 | 321 | -20.9096389  | 0.486161576 | 1 | 0.819417495 |
| PCa C38:0  | 307 | -47.65650858 | 0.265966701 | 1 | 0.517681608 | 352 | -30.38614384 | 0.438304869 | 1 | 0.77631964  |
| PCa C38:2  | 257 | -18.16414133 | 0.640632205 | 1 | 0.787600769 | 298 | -2.088926278 | 0.948196032 | 1 | 0.969997189 |
| PCa C38:3  | 307 | 123.210629   | 0.036573375 | 1 | 0.193694364 | 354 | 33.32944894  | 0.472238123 | 1 | 0.814305233 |
| PCa C38:4  | 308 | -28.86122186 | 0.632868518 | 1 | 0.787213709 | 354 | -108.6269192 | 0.034283428 | 1 | 0.269248704 |
| PCa C38:5  | 307 | 48.40401175  | 0.430713342 | 1 | 0.657073638 | 352 | -9.251487591 | 0.861566874 | 1 | 0.954240085 |
| PCa C38:6  | 308 | -58.82389929 | 0.254647237 | 1 | 0.511743005 | 353 | -89.76288771 | 0.055055213 | 1 | 0.343934554 |
| PCa C40:0  | 244 | -22.2639619  | 0.580493036 | 1 | 0.782729319 | 278 | -19.61207606 | 0.590938102 | 1 | 0.870238161 |
| PCa C40:4  | 295 | 58.35433724  | 0.249648276 | 1 | 0.50656786  | 338 | -24.65714567 | 0.556515674 | 1 | 0.842838955 |
| PCa C40:5  | 308 | 89.18082876  | 0.041643827 | 1 | 0.193694364 | 355 | 39.40516312  | 0.23160602  | 1 | 0.607862018 |
| PCa C40:6  | 309 | -61.8404918  | 0.163183284 | 1 | 0.422484738 | 354 | -50.99094624 | 0.223899388 | 1 | 0.607862018 |
| PCa C42:0  | 212 | -88.47099375 | 0.041228578 | 1 | 0.193694364 | 240 | -7.777218074 | 0.853157331 | 1 | 0.954240085 |
| PCa C42:1  | 156 | -125.469724  | 0.032495575 | 1 | 0.193694364 | 189 | -77.9788472  | 0.117064314 | 1 | 0.470508494 |
| PCa C42:5  | 167 | -43.08794754 | 0.440356462 | 1 | 0.66525198  | 189 | -87.75070893 | 0.064550226 | 1 | 0.374749924 |
| PCa C43:6  | 293 | -26.79532657 | 0.520571109 | 1 | 0.740131713 | 334 | -18.68847155 | 0.609628181 | 1 | 0.870238161 |
| PCa C44:12 | 294 | 5.782466879  | 0.888636277 | 1 | 0.944836912 | 331 | 11.31289497  | 0.750704378 | 1 | 0.902262667 |
| PCe C32:0  | 309 | 83.57830218  | 0.086935947 | 1 | 0.279532507 | 355 | -5.639926886 | 0.894885439 | 1 | 0.954240085 |
| PCe C32:1  | 309 | 18.90370203  | 0.695602036 | 1 | 0.826027417 | 355 | -27.04159157 | 0.544211987 | 1 | 0.833598357 |
| PCe C32:2  | 293 | -4.451372647 | 0.914789458 | 1 | 0.960758777 | 340 | -29.30482704 | 0.388545151 | 1 | 0.755051745 |
| PCe C34:0  | 309 | -26.10993477 | 0.509176987 | 1 | 0.739013821 | 355 | -35.9680254  | 0.311529459 | 1 | 0.682473902 |

|                        |                                            |
|------------------------|--------------------------------------------|
| Obes Facts             |                                            |
| DOI: 10.1159/000453001 | © 2017 The Author(s)<br>www.karger.com/ofa |

Hellmuth et al.: Cord Blood Metabolome Is Highly Associated with Birth Weight, but Less Predictive for Later Weight Development

|           |     |              |             |             |   |             |     |              |             |             |   |             |
|-----------|-----|--------------|-------------|-------------|---|-------------|-----|--------------|-------------|-------------|---|-------------|
| PCe C34:1 | 309 | 66.78156896  | 0.184956159 |             | 1 | 0.439270879 | 354 | 20.30638896  | 0.668646651 |             | 1 | 0.870238161 |
| PCe C34:2 | 308 | -13.97814726 | 0.787633285 |             | 1 | 0.894648677 | 354 | -10.56466322 | 0.823524555 |             | 1 | 0.950920619 |
| PCe C34:3 | 308 | -79.55244356 | 0.059586135 |             | 1 | 0.214715554 | 354 | -91.09884473 | 0.017365189 |             | 1 | 0.181466222 |
| PCe C34:4 | 257 | -10.38871189 | 0.723448618 |             | 1 | 0.840004229 | 302 | -2.975225477 | 0.893285057 |             | 1 | 0.954240085 |
| PCe C36:0 | 253 | -19.59930359 | 0.645334238 |             | 1 | 0.788741846 | 284 | 23.78763462  | 0.546425717 |             | 1 | 0.833598357 |
| PCe C36:1 | 308 | -37.60932366 | 0.413409142 |             | 1 | 0.646437724 | 354 | -19.43919494 | 0.634918545 |             | 1 | 0.870238161 |
| PCe C36:2 | 308 | -25.29556296 | 0.607561303 |             | 1 | 0.784054455 | 353 | -60.23810559 | 0.154391986 |             | 1 | 0.537968259 |
| PCe C36:3 | 306 | 94.01624883  | 0.058988337 |             | 1 | 0.214715554 | 354 | 44.88807395  | 0.294543033 |             | 1 | 0.666391055 |
| PCe C36:4 | 308 | 84.40074857  | 0.132482229 |             | 1 | 0.369183812 | 354 | -6.72451077  | 0.888081358 |             | 1 | 0.954240085 |
| PCe C36:5 | 308 | -60.82542377 | 0.243226857 |             | 1 | 0.503311021 | 354 | -61.98891096 | 0.162170482 |             | 1 | 0.537994139 |
| PCe C36:6 | 178 | -1.540919077 | 0.942659155 |             | 1 | 0.961052504 | 200 | -3.415128677 | 0.853244504 |             | 1 | 0.954240085 |
| PCe C38:0 | 308 | -112.5664994 | 0.004357886 | 0.910798088 |   | 0.053576358 | 352 | -103.2498676 | 0.003642977 | 0.761382138 |   | 0.054384438 |
| PCe C38:2 | 302 | -39.60318307 | 0.19336963  |             | 1 | 0.454008305 | 350 | 14.33330552  | 0.573381633 |             | 1 | 0.855976866 |
| PCe C38:3 | 303 | -76.63457533 | 0.057672109 |             | 1 | 0.214715554 | 351 | -41.56998255 | 0.225183632 |             | 1 | 0.607862018 |
| PCe C38:4 | 308 | -2.04679096  | 0.972318631 |             | 1 | 0.981713014 | 353 | -58.71221875 | 0.249973255 |             | 1 | 0.614640121 |
| PCe C38:5 | 308 | 34.50204466  | 0.534200192 |             | 1 | 0.754377299 | 353 | 0.07820553   | 0.998715052 |             | 1 | 0.998715052 |
| PCe C38:6 | 309 | -52.68912388 | 0.300382985 |             | 1 | 0.560536107 | 353 | -58.97072434 | 0.19513026  |             | 1 | 0.590177482 |
| PCe C40:0 | 308 | -90.90804878 | 0.088770927 |             | 1 | 0.281107934 | 353 | -54.65612481 | 0.272192711 |             | 1 | 0.653888237 |
| PCe C40:1 | 271 | 0.752888113  | 0.983450976 |             | 1 | 0.988179106 | 306 | 11.92377696  | 0.724049091 |             | 1 | 0.886426234 |
| PCe C40:3 | 240 | -25.82138502 | 0.445623336 |             | 1 | 0.66525198  | 277 | -49.46905329 | 0.097789315 |             | 1 | 0.464499245 |
| PCe C40:4 | 307 | -111.949718  | 0.015502085 |             | 1 | 0.119532599 | 351 | -40.36847861 | 0.329698311 |             | 1 | 0.705908753 |

Hellmuth et al.: Cord Blood Metabolome Is Highly Associated with Birth Weight, but Less Predictive for Later Weight Development

|           |     |              |             |             |   |             |     |              |             |             |   |             |
|-----------|-----|--------------|-------------|-------------|---|-------------|-----|--------------|-------------|-------------|---|-------------|
| PCe C40:5 | 305 | -88.56155694 | 0.044072911 |             | 1 | 0.193694364 | 351 | -32.34690541 | 0.366900681 |             | 1 | 0.735361092 |
| PCe C40:6 | 308 | -94.64444416 | 0.053032219 |             | 1 | 0.207863201 | 352 | -135.7794759 | 0.002102033 | 0.439324864 |   | 0.039938624 |
| PCe C42:1 | 176 | -37.68710353 | 0.408735991 |             | 1 | 0.646437724 | 194 | -51.10956553 | 0.197667099 |             | 1 | 0.590177482 |
| PCe C42:2 | 245 | -8.051752286 | 0.818173737 |             | 1 | 0.914806167 | 283 | -29.86070354 | 0.300297234 |             | 1 | 0.667682148 |
| PCe C42:3 | 212 | -33.7108218  | 0.368546329 |             | 1 | 0.636292323 | 238 | -21.23861938 | 0.516207255 |             | 1 | 0.833598357 |
| PCe C42:4 | 288 | -70.48889571 | 0.104243761 |             | 1 | 0.314216373 | 323 | -22.37328388 | 0.539354693 |             | 1 | 0.833598357 |
| PCe C42:5 | 275 | -46.44287095 | 0.297423401 |             | 1 | 0.56001343  | 308 | -9.016914464 | 0.805916443 |             | 1 | 0.940986238 |
| PCe C42:6 | 283 | -84.95462358 | 0.041920861 |             | 1 | 0.193694364 | 315 | -71.60159986 | 0.048793854 |             | 1 | 0.328965014 |
| Phe       | 308 | -230.7441553 | 0.0036767   | 0.768430333 |   | 0.048026896 | 355 | 51.65421181  | 0.429916742 |             | 1 | 0.770195218 |
| Pro       | 308 | -178.3677367 | 0.014186673 |             | 1 | 0.114039025 | 354 | 55.67954383  | 0.350627833 |             | 1 | 0.725556606 |
| Ser       | 307 | -67.04204286 | 0.239674423 |             | 1 | 0.501365196 | 354 | 23.57205033  | 0.622308386 |             | 1 | 0.870238161 |
| SM C21:2  | 203 | 47.85446346  | 0.136502623 |             | 1 | 0.375382214 | 230 | -9.790501289 | 0.696508843 |             | 1 | 0.88151474  |
| SM C30:1  | 245 | -72.29544858 | 0.054700842 |             | 1 | 0.207863201 | 284 | 8.876758535  | 0.772964123 |             | 1 | 0.92314001  |
| SM C31:1  | 165 | 31.48299171  | 0.408817967 |             | 1 | 0.646437724 | 198 | -49.9234003  | 0.155003828 |             | 1 | 0.537968259 |
| SM C32:1  | 309 | 47.00965902  | 0.371424227 |             | 1 | 0.636292323 | 354 | -13.18935551 | 0.797582608 |             | 1 | 0.940986238 |
| SM C32:2  | 308 | 93.28771558  | 0.039414885 |             | 1 | 0.193694364 | 354 | 34.49605338  | 0.360957205 |             | 1 | 0.735361092 |
| SM C33:1  | 308 | 42.68100665  | 0.420648471 |             | 1 | 0.646437724 | 354 | -58.37013546 | 0.25547962  |             | 1 | 0.62087489  |
| SM C34:0  | 306 | 21.37058175  | 0.711986449 |             | 1 | 0.833065993 | 352 | 22.12137831  | 0.671363997 |             | 1 | 0.870238161 |
| SM C34:1  | 308 | -11.0692247  | 0.860988241 |             | 1 | 0.927559497 | 354 | -72.81386045 | 0.243676765 |             | 1 | 0.607862018 |
| SM C34:2  | 309 | 88.7831974   | 0.105239934 |             | 1 | 0.314216373 | 355 | 2.613983787  | 0.958449742 |             | 1 | 0.969997189 |
| SM C35:1  | 308 | 15.06174663  | 0.767956558 |             | 1 | 0.87706514  | 354 | -99.52627657 | 0.041689955 |             | 1 | 0.311185739 |

Hellmuth et al.: Cord Blood Metabolome Is Highly Associated with Birth Weight, but Less Predictive for Later Weight Development

|          |     |              |             |             |             |     |              |             |   |             |
|----------|-----|--------------|-------------|-------------|-------------|-----|--------------|-------------|---|-------------|
| SM C35:2 | 273 | -14.39853065 | 0.744673137 | 1           | 0.856866819 | 306 | 25.46324698  | 0.513650031 | 1 | 0.833598357 |
| SM C36:0 | 210 | 62.57887446  | 0.39664388  | 1           | 0.645870752 | 250 | 64.87315604  | 0.24430818  | 1 | 0.607862018 |
| SM C36:1 | 308 | 54.23220798  | 0.385928557 | 1           | 0.645870752 | 355 | -24.17854319 | 0.66754875  | 1 | 0.870238161 |
| SM C36:2 | 309 | 43.7873094   | 0.44302909  | 1           | 0.66525198  | 355 | 38.60618303  | 0.42714077  | 1 | 0.770195218 |
| SM C36:3 | 283 | 72.15946045  | 0.078989353 | 1           | 0.262044043 | 328 | -41.14811013 | 0.23929411  | 1 | 0.607862018 |
| SM C37:2 | 180 | 7.599137351  | 0.886426782 | 1           | 0.944836912 | 221 | 43.15198508  | 0.333227437 | 1 | 0.705908753 |
| SM C37:3 | 299 | -24.3254812  | 0.418659967 | 1           | 0.646437724 | 339 | 10.03330075  | 0.72470178  | 1 | 0.886426234 |
| SM C38:1 | 258 | 65.12673368  | 0.286915815 | 1           | 0.545140049 | 297 | 21.06286706  | 0.708586011 | 1 | 0.88151474  |
| SM C38:2 | 308 | 71.67028735  | 0.200055811 | 1           | 0.459468841 | 354 | -35.84173145 | 0.454715536 | 1 | 0.798618043 |
| SM C38:3 | 304 | 22.65764293  | 0.618834716 | 1           | 0.784054455 | 349 | -35.03566253 | 0.286674707 | 1 | 0.658406745 |
| SM C39:1 | 306 | -64.59842522 | 0.171625464 | 1           | 0.427668924 | 353 | -48.59392896 | 0.22952425  | 1 | 0.607862018 |
| SM C39:4 | 215 | -4.347274605 | 0.92307048  | 1           | 0.961052504 | 251 | -66.95376838 | 0.084810829 | 1 | 0.45449906  |
| SM C39:5 | 290 | -51.34486204 | 0.205325719 | 1           | 0.466266737 | 332 | 17.04264856  | 0.638191591 | 1 | 0.870238161 |
| SM C40:1 | 286 | 66.12435493  | 0.263455184 | 1           | 0.517681608 | 323 | 5.476648346  | 0.918969856 | 1 | 0.962085107 |
| SM C40:2 | 309 | 27.6813513   | 0.604512077 | 1           | 0.784054455 | 354 | -30.16638414 | 0.529318806 | 1 | 0.833598357 |
| SM C40:3 | 183 | 31.6741413   | 0.578592802 | 1           | 0.782729319 | 220 | 19.04307645  | 0.681691814 | 1 | 0.874071098 |
| SM C40:4 | 305 | 31.59217842  | 0.564957876 | 1           | 0.781111814 | 351 | -68.18469008 | 0.146136668 | 1 | 0.53583445  |
| SM C40:5 | 274 | -136.1831007 | 0.002494869 | 0.521427546 | 0.034761836 | 323 | -38.0546743  | 0.283433884 | 1 | 0.658196465 |
| SM C41:1 | 307 | -95.7845329  | 0.043887621 | 1           | 0.193694364 | 354 | -30.92912733 | 0.481754858 | 1 | 0.818591588 |
| SM C41:2 | 308 | -26.70371713 | 0.555415332 | 1           | 0.773878697 | 354 | -65.2280705  | 0.110812891 | 1 | 0.470508494 |
| SM C41:5 | 234 | 16.04170684  | 0.708066636 | 1           | 0.833065993 | 272 | 10.88231988  | 0.751166048 | 1 | 0.902262667 |

Hellmuth et al.: Cord Blood Metabolome Is Highly Associated with Birth Weight, but Less Predictive for Later Weight Development

|           |     |              |             |   |             |     |              |             |   |             |
|-----------|-----|--------------|-------------|---|-------------|-----|--------------|-------------|---|-------------|
| SM C42:1  | 308 | -40.78925927 | 0.495644503 | 1 | 0.724403504 | 355 | -35.39420428 | 0.498378087 | 1 | 0.826674764 |
| SM C42:2  | 307 | -3.536585299 | 0.953412876 | 1 | 0.96729753  | 353 | -36.22436523 | 0.490865012 | 1 | 0.8207263   |
| SM C42:3  | 309 | 67.10621576  | 0.165759562 | 1 | 0.422484738 | 355 | -20.73689655 | 0.618946554 | 1 | 0.870238161 |
| SM C42:4  | 195 | -144.7022383 | 0.051770934 | 1 | 0.207863201 | 241 | -82.02785843 | 0.133775428 | 1 | 0.506477044 |
| SM C42:5  | 177 | 14.27832722  | 0.746171106 | 1 | 0.856866819 | 215 | -32.55325057 | 0.395158097 | 1 | 0.75768846  |
| SM C42:6  | 306 | -34.68651607 | 0.491917313 | 1 | 0.724019144 | 350 | -60.23945438 | 0.159536545 | 1 | 0.537968259 |
| SM C43:0  | 142 | -114.8121595 | 0.112843592 | 1 | 0.32307275  | 179 | -113.7731869 | 0.028400483 | 1 | 0.247320877 |
| SM C43:2  | 290 | -43.81726418 | 0.325283324 | 1 | 0.591167085 | 334 | -3.56455567  | 0.926142477 | 1 | 0.962085107 |
| SM C44:6  | 187 | -63.2470571  | 0.184245629 | 1 | 0.439270879 | 219 | -51.44638369 | 0.201932102 | 1 | 0.594419849 |
| Thr       | 308 | 32.17720114  | 0.609005387 | 1 | 0.784054455 | 353 | 68.21266774  | 0.239806108 | 1 | 0.607862018 |
| Trp       | 307 | -92.56861358 | 0.257345818 | 1 | 0.512240724 | 351 | 126.9736622  | 0.055951076 | 1 | 0.343934554 |
| Tyr       | 307 | -137.8549319 | 0.076531634 | 1 | 0.261734749 | 353 | 82.95402024  | 0.227106842 | 1 | 0.607862018 |
| Val       | 308 | -215.1440605 | 0.017731676 | 1 | 0.123530678 | 351 | 54.35610635  | 0.473484897 | 1 | 0.814305233 |
| NEFA 12:0 | 308 | -13.51776384 | 0.596583367 | 1 | 0.784054455 | 353 | -8.337072663 | 0.707627385 | 1 | 0.88151474  |
| NEFA 14:0 | 308 | -18.89197275 | 0.516619556 | 1 | 0.739544433 | 353 | 4.392399246  | 0.856368302 | 1 | 0.954240085 |
| NEFA 14:1 | 309 | -15.94302094 | 0.516333921 | 1 | 0.739544433 | 354 | -7.219132151 | 0.725257828 | 1 | 0.886426234 |
| NEFA 15:0 | 307 | -29.20388013 | 0.388539473 | 1 | 0.645870752 | 353 | 4.334155863  | 0.881042242 | 1 | 0.954240085 |
| NEFA 15:1 | 266 | -28.74432056 | 0.358170133 | 1 | 0.629055107 | 309 | -9.636774734 | 0.707066321 | 1 | 0.88151474  |
| NEFA 16:0 | 308 | -97.37914862 | 0.04448483  | 1 | 0.193694364 | 353 | -36.9969551  | 0.39017028  | 1 | 0.755051745 |
| NEFA 16:1 | 309 | -24.21549966 | 0.398542086 | 1 | 0.645870752 | 355 | -15.31212601 | 0.520795395 | 1 | 0.833598357 |
| NEFA 16:2 | 279 | -75.42261335 | 0.0530558   | 1 | 0.207863201 | 322 | -34.74341086 | 0.243659051 | 1 | 0.607862018 |

|                        |                                            |
|------------------------|--------------------------------------------|
| Obes Facts             |                                            |
| DOI: 10.1159/000453001 | © 2017 The Author(s)<br>www.karger.com/ofa |

Hellmuth et al.: Cord Blood Metabolome Is Highly Associated with Birth Weight, but Less Predictive for Later Weight Development

|           |     |              |             |             |             |             |              |              |             |   |             |
|-----------|-----|--------------|-------------|-------------|-------------|-------------|--------------|--------------|-------------|---|-------------|
| NEFA 16:3 | 244 | -105.5234027 | 0.017596149 |             | 1           | 0.123530678 | 285          | -53.78487674 | 0.135706768 | 1 | 0.506477044 |
| NEFA 17:0 | 308 | -93.60031369 | 0.060880462 |             | 1           | 0.215661296 | 353          | -46.75188199 | 0.278976231 | 1 | 0.658196465 |
| NEFA 17:1 | 308 | -30.35310543 | 0.406400507 |             | 1           | 0.646437724 | 353          | 1.381653032  | 0.965356054 | 1 | 0.969997189 |
| NEFA 18:0 | 307 | -111.0516751 | 0.050673941 |             | 1           | 0.207863201 | 352          | -83.25848056 | 0.106982046 | 1 | 0.470508494 |
| NEFA 18:1 | 308 | -33.17195711 | 0.391066677 |             | 1           | 0.645870752 | 353          | -1.580624081 | 0.961585938 | 1 | 0.969997189 |
| NEFA 18:2 | 308 | -63.75882635 | 0.094572518 |             | 1           | 0.290671417 | 353          | -15.7907109  | 0.616055391 | 1 | 0.870238161 |
| NEFA 18:3 | 308 | -43.73951521 | 0.151763117 |             | 1           | 0.406647327 | 353          | 2.607648194  | 0.916116701 | 1 | 0.962085107 |
| NEFA 18:4 | 278 | -66.65643733 | 0.033534248 |             | 1           | 0.193694364 | 313          | -28.61444257 | 0.233007049 | 1 | 0.607862018 |
| NEFA 19:1 | 308 | -49.97133846 | 0.221329792 |             | 1           | 0.472507648 | 353          | -18.19053041 | 0.612537556 | 1 | 0.870238161 |
| NEFA 20:0 | 242 | -52.19071507 | 0.356660961 |             | 1           | 0.629055107 | 288          | -5.364719978 | 0.91687205  | 1 | 0.962085107 |
| NEFA 20:1 | 308 | -22.07581721 | 0.635537312 |             | 1           | 0.787213709 | 353          | 18.0748347   | 0.648419787 | 1 | 0.870238161 |
| NEFA 20:2 | 268 | -104.9604024 | 0.020999989 |             | 1           | 0.13715618  | 315          | -61.57746712 | 0.095673535 | 1 | 0.464499245 |
| NEFA 20:3 | 294 | -75.55759449 | 0.093995816 |             | 1           | 0.290671417 | 336          | -3.561253058 | 0.929862161 | 1 | 0.962085107 |
| NEFA 20:4 | 309 | -89.51961805 | 0.042346333 |             | 1           | 0.193694364 | 352          | -20.63370377 | 0.611522772 | 1 | 0.870238161 |
| NEFA 20:5 | 278 | -142.1348    | 7.84E-06    | 0.001639512 | 0.000204939 | 322         | -69.90135082 | 0.011120737  |             | 1 | 0.129124116 |
| NEFA 22:0 | 250 | -15.48004835 | 0.649694564 |             | 1           | 0.789454441 | 301          | -8.266135581 | 0.80264701  | 1 | 0.940986238 |
| NEFA 22:1 | 269 | 17.39730142  | 0.679453381 |             | 1           | 0.811461467 | 315          | 23.47420643  | 0.543290921 | 1 | 0.833598357 |
| NEFA 22:2 | 264 | -47.10325727 | 0.364467199 |             | 1           | 0.634780372 | 310          | 20.41271849  | 0.653120472 | 1 | 0.870238161 |
| NEFA 22:3 | 242 | -12.70783517 | 0.812967515 |             | 1           | 0.914806167 | 269          | 3.46068184   | 0.940804931 | 1 | 0.968611973 |
| NEFA 22:4 | 308 | -162.8960414 | 0.001025338 | 0.214295583 | 0.019481417 | 353         | -43.78449098 | 0.33437783   |             | 1 | 0.705908753 |
| NEFA 22:5 | 308 | -146.3718512 | 0.001359546 | 0.284145171 | 0.022597613 | 354         | -38.56798022 | 0.313480835  |             | 1 | 0.682473902 |



Hellmuth et al.: Cord Blood Metabolome Is Highly Associated with Birth Weight, but Less Predictive for Later Weight Development

|           |     |              |             |             |             |     |              |             |   |             |
|-----------|-----|--------------|-------------|-------------|-------------|-----|--------------|-------------|---|-------------|
| NEFA 22:6 | 308 | -215.7626586 | 2.05E-06    | 0.000428966 | 6.62E-05    | 353 | -90.67130574 | 0.025497706 | 1 | 0.235345416 |
| NEFA 24:1 | 295 | 8.428671505  | 0.890587903 | 1           | 0.944836912 | 336 | 9.283584361  | 0.867523113 | 1 | 0.954240085 |
| NEFA 24:2 | 222 | -97.40242335 | 0.195505969 | 1           | 0.454008305 | 260 | -136.4879259 | 0.022184017 | 1 | 0.220783788 |
| NEFA 24:3 | 233 | -35.92745122 | 0.569212055 | 1           | 0.781111814 | 274 | 8.046454912  | 0.882145407 | 1 | 0.954240085 |
| NEFA 24:4 | 308 | -159.8286881 | 0.001405593 | 0.293768972 | 0.022597613 | 354 | -56.29208923 | 0.216537843 | 1 | 0.607862018 |
| NEFA 26:0 | 254 | -39.0151058  | 0.388919473 | 1           | 0.645870752 | 302 | -57.69614852 | 0.15958867  | 1 | 0.537968259 |
| NEFA 26:3 | 261 | -35.265179   | 0.549440667 | 1           | 0.770691943 | 307 | 76.25050091  | 0.181593252 | 1 | 0.58389215  |
| NEFA 26:4 | 220 | -131.9724276 | 0.054613232 | 1           | 0.207863201 | 250 | -85.82984225 | 0.19749511  | 1 | 0.590177482 |

Hellmuth et al.: Cord Blood Metabolome Is Highly Associated with Birth Weight, but Less Predictive for Later Weight Development

**Supplemental table 4** To determine the potential effect of maternal pre-pregnancy BMI, weight gain during pregnancy and gestational diabetes, we additionally calculated linear regression models using cord blood metabolites as outcome for each **maternal factor**.

|     | Maternal weight gain |             |        |             | Pre-pregnancy BMI |             |        |             | Gestational diabetes |             |        |             |
|-----|----------------------|-------------|--------|-------------|-------------------|-------------|--------|-------------|----------------------|-------------|--------|-------------|
|     | $\beta$              | p           | p bonf | p fdr       | $\beta$           | p           | p bonf | p fdr       | $\beta$              | p           | p bonf | p fdr       |
| Ala | 0.271804885          | 0.041019946 | 1      | 0.476287156 | -0.006467014      | 0.17884007  | 1      | 0.783684185 | 0.046780022          | 0.636684171 | 1      | 0.985032959 |
| Arg | -0.218318817         | 0.390845548 | 1      | 0.928258176 | -0.008235835      | 0.365574501 | 1      | 0.784196605 | -0.026813501         | 0.88896651  | 1      | 0.985032959 |
| Asn | 0.063618787          | 0.658173354 | 1      | 0.93421204  | -0.011669636      | 0.022389639 | 1      | 0.645841475 | 0.044732905          | 0.676989469 | 1      | 0.985032959 |
| Asp | -0.051655485         | 0.817911858 | 1      | 0.93421204  | -0.008878315      | 0.266992595 | 1      | 0.783684185 | 0.015309221          | 0.926519831 | 1      | 0.985032959 |
| Cit | 0.150456141          | 0.336170912 | 1      | 0.90076565  | -0.005551864      | 0.328126009 | 1      | 0.783684185 | 0.149065232          | 0.210491193 | 1      | 0.985032959 |
| Gln | 0.120379532          | 0.564761264 | 1      | 0.93421204  | -0.009782483      | 0.190643749 | 1      | 0.783684185 | -0.019615328         | 0.901123835 | 1      | 0.985032959 |
| Glu | -0.080753991         | 0.577608524 | 1      | 0.93421204  | -0.006314948      | 0.223393199 | 1      | 0.783684185 | 0.016001767          | 0.875226553 | 1      | 0.985032959 |
| Gly | -0.028207262         | 0.827168104 | 1      | 0.93421204  | -0.004879873      | 0.290654224 | 1      | 0.783684185 | 0.006608483          | 0.945477501 | 1      | 0.985032959 |
| His | 0.082381265          | 0.486524309 | 1      | 0.93421204  | -0.003609023      | 0.401082364 | 1      | 0.796255118 | 0.158542735          | 0.082627626 | 1      | 0.985032959 |
| Ile | 0.113935485          | 0.295432277 | 1      | 0.856252495 | 0.004495483       | 0.249468929 | 1      | 0.783684185 | 0.013684154          | 0.871589382 | 1      | 0.985032959 |
| Leu | 0.122025369          | 0.257862993 | 1      | 0.845683139 | 0.004006271       | 0.30148465  | 1      | 0.783684185 | -0.007294264         | 0.928732494 | 1      | 0.985032959 |
| Lys | 0.080146395          | 0.495615007 | 1      | 0.93421204  | -3.64E-06         | 0.999300732 | 1      | 0.999300732 | -0.033154056         | 0.695269639 | 1      | 0.985032959 |
| Met | 0.17033596           | 0.179285526 | 1      | 0.749413499 | -0.007083718      | 0.122878453 | 1      | 0.755341082 | -0.023210053         | 0.804727394 | 1      | 0.985032959 |
| Orn | 0.049359871          | 0.768287163 | 1      | 0.93421204  | -0.011183942      | 0.060523319 | 1      | 0.733952881 | -0.057109525         | 0.646744062 | 1      | 0.985032959 |
| Phe | 0.091159982          | 0.375258759 | 1      | 0.928258176 | 0.001879132       | 0.613124374 | 1      | 0.889881904 | -0.040881827         | 0.584700914 | 1      | 0.985032959 |
| Pro | 0.061650465          | 0.58546537  | 1      | 0.93421204  | -0.009898461      | 0.01491653  | 1      | 0.623510952 | -0.023628915         | 0.781999024 | 1      | 0.985032959 |

Hellmuth et al.: Cord Blood Metabolome Is Highly Associated with Birth Weight, but Less Predictive for Later Weight Development

|           |              |             |            |             |              |             |   |             |              |             |   |             |
|-----------|--------------|-------------|------------|-------------|--------------|-------------|---|-------------|--------------|-------------|---|-------------|
| Trp       | -0.250069744 | 0.013356407 | 1          | 0.348936129 | 0.00639905   | 0.078739953 | 1 | 0.733952881 | -0.083164585 | 0.267655568 | 1 | 0.985032959 |
| Ser       | 0.073727431  | 0.606066362 | 1          | 0.93421204  | -0.006051092 | 0.237727342 | 1 | 0.783684185 | 0.003463021  | 0.974046912 | 1 | 0.985032959 |
| Thr       | -0.070704189 | 0.566114003 | 1          | 0.93421204  | -0.009363353 | 0.03503628  | 1 | 0.665689318 | 0.152141085  | 0.103487118 | 1 | 0.985032959 |
| Tyr       | 0.292954116  | 0.004467115 | 0.93362694 | 0.186725388 | 0.004681761  | 0.207792914 | 1 | 0.783684185 | -0.008270004 | 0.916564657 | 1 | 0.985032959 |
| Val       | -0.013232073 | 0.883353465 | 1          | 0.93421204  | 0.004350755  | 0.179363705 | 1 | 0.783684185 | -0.057208514 | 0.398187589 | 1 | 0.985032959 |
| NEFA 12:0 | -0.114663043 | 0.714289517 | 1          | 0.93421204  | -0.026019648 | 0.021347218 | 1 | 0.645841475 | 0.158524969  | 0.517022668 | 1 | 0.985032959 |
| NEFA 14:0 | -0.316395339 | 0.260252808 | 1          | 0.845683139 | -0.007368251 | 0.467333117 | 1 | 0.865713557 | 0.098549348  | 0.642526503 | 1 | 0.985032959 |
| NEFA 14:1 | -0.228268483 | 0.489299877 | 1          | 0.93421204  | 0.003064678  | 0.797671172 | 1 | 0.96151916  | 0.197185415  | 0.423509357 | 1 | 0.985032959 |
| NEFA 15:0 | -0.501132937 | 0.039413112 | 1          | 0.476287156 | -0.013616382 | 0.119310719 | 1 | 0.755341082 | 0.070327379  | 0.700119163 | 1 | 0.985032959 |
| NEFA 15:1 | -0.141693058 | 0.642440614 | 1          | 0.93421204  | -0.007594172 | 0.493425322 | 1 | 0.865713557 | -0.109473712 | 0.646182925 | 1 | 0.985032959 |
| NEFA 16:0 | -0.086320553 | 0.600764705 | 1          | 0.93421204  | 0.008715741  | 0.139628035 | 1 | 0.783684185 | 0.057825221  | 0.635149074 | 1 | 0.985032959 |
| NEFA 16:1 | -0.259426998 | 0.360510392 | 1          | 0.928258176 | 0.018438994  | 0.071995621 | 1 | 0.733952881 | 0.084088212  | 0.693734239 | 1 | 0.985032959 |
| NEFA 17:0 | -0.443998544 | 0.007209188 | 1          | 0.251120043 | -0.00329806  | 0.577900837 | 1 | 0.889881904 | 0.003560197  | 0.977035055 | 1 | 0.985032959 |
| NEFA 17:1 | -0.359270879 | 0.104334697 | 1          | 0.589350043 | 0.004050783  | 0.610863201 | 1 | 0.889881904 | 0.155866633  | 0.345347118 | 1 | 0.985032959 |
| NEFA 18:0 | -0.034951203 | 0.802907061 | 1          | 0.93421204  | 0.00844093   | 0.091305143 | 1 | 0.733952881 | -0.034007763 | 0.744908962 | 1 | 0.985032959 |
| NEFA 18:1 | -0.240025269 | 0.254685134 | 1          | 0.845683139 | 0.015514585  | 0.040342712 | 1 | 0.702635575 | 0.112335542  | 0.47104459  | 1 | 0.985032959 |
| NEFA 18:2 | -0.055788572 | 0.795510416 | 1          | 0.93421204  | 0.004591654  | 0.553662941 | 1 | 0.889881904 | 0.111732454  | 0.490202837 | 1 | 0.985032959 |
| NEFA 18:3 | 0.072143986  | 0.791134637 | 1          | 0.93421204  | 0.006948805  | 0.478843842 | 1 | 0.865713557 | 0.173169666  | 0.392630039 | 1 | 0.985032959 |
| NEFA 20:0 | -0.068956274 | 0.692439276 | 1          | 0.93421204  | 0.0026992    | 0.663945302 | 1 | 0.901068625 | 0.146491642  | 0.336201783 | 1 | 0.985032959 |
| NEFA 20:1 | -0.318405227 | 0.069120671 | 1          | 0.563380942 | 0.009958372  | 0.112736638 | 1 | 0.755341082 | 0.115390882  | 0.36669573  | 1 | 0.985032959 |
| NEFA 20:2 | 0.459390193  | 0.024586618 | 1          | 0.395277172 | 0.007061485  | 0.340862578 | 1 | 0.783684185 | 0.09018493   | 0.565641351 | 1 | 0.985032959 |
| NEFA 20:3 | 0.090044332  | 0.614409839 | 1          | 0.93421204  | 0.00614067   | 0.343087109 | 1 | 0.783684185 | 0.014680063  | 0.907613584 | 1 | 0.985032959 |
| NEFA 20:4 | -0.075136857 | 0.667161602 | 1          | 0.93421204  | 0.004348576  | 0.490780254 | 1 | 0.865713557 | 0.048490414  | 0.695256487 | 1 | 0.985032959 |

Hellmuth et al.: Cord Blood Metabolome Is Highly Associated with Birth Weight, but Less Predictive for Later Weight Development

|           |              |             |   |             |              |             |   |             |              |             |   |             |
|-----------|--------------|-------------|---|-------------|--------------|-------------|---|-------------|--------------|-------------|---|-------------|
| NEFA 22:0 | -0.015445007 | 0.95397122  | 1 | 0.977352868 | -0.004993152 | 0.608024092 | 1 | 0.889881904 | 0.164704194  | 0.389479664 | 1 | 0.985032959 |
| NEFA 22:1 | -0.23074984  | 0.267057833 | 1 | 0.845683139 | 0.008044254  | 0.285725749 | 1 | 0.783684185 | 0.14926103   | 0.304251237 | 1 | 0.985032959 |
| NEFA 22:2 | 0.075116507  | 0.66673801  | 1 | 0.93421204  | 0.007023047  | 0.27032566  | 1 | 0.783684185 | 0.05023974   | 0.695957908 | 1 | 0.985032959 |
| NEFA 22:6 | -0.036306554 | 0.834034747 | 1 | 0.93421204  | 0.01088622   | 0.083887795 | 1 | 0.733952881 | -0.063603222 | 0.606299825 | 1 | 0.985032959 |
| NEFA 24:1 | -0.203772148 | 0.125830714 | 1 | 0.657465483 | 0.007757415  | 0.107116663 | 1 | 0.755341082 | 0.075916439  | 0.445679088 | 1 | 0.985032959 |
| NEFA 16:2 | -0.109390244 | 0.647532584 | 1 | 0.93421204  | 0.009121485  | 0.293607853 | 1 | 0.783684185 | 0.084886444  | 0.626444846 | 1 | 0.985032959 |
| NEFA 16:3 | 0.01654671   | 0.942934467 | 1 | 0.975597148 | 0.012247993  | 0.148124559 | 1 | 0.783684185 | 0.09498864   | 0.554677422 | 1 | 0.985032959 |
| NEFA 18:4 | -0.112842906 | 0.708364424 | 1 | 0.93421204  | 0.004009043  | 0.714009556 | 1 | 0.932945422 | 0.199064526  | 0.376873122 | 1 | 0.985032959 |
| NEFA 19:1 | -0.342321008 | 0.084422468 | 1 | 0.564550669 | 0.002230483  | 0.753241536 | 1 | 0.956734353 | -0.045322287 | 0.76495487  | 1 | 0.985032959 |
| NEFA 20:5 | 0.374691682  | 0.170711242 | 1 | 0.728135704 | 0.010421338  | 0.293532201 | 1 | 0.783684185 | 0.01875616   | 0.934907606 | 1 | 0.985032959 |
| NEFA 22:3 | 0.097983587  | 0.598614369 | 1 | 0.93421204  | 0.01039643   | 0.118022317 | 1 | 0.755341082 | 0.223417925  | 0.079038242 | 1 | 0.985032959 |
| NEFA 22:4 | 0.026910805  | 0.864134315 | 1 | 0.93421204  | 0.015045967  | 0.00821581  | 1 | 0.623510952 | 0.014241103  | 0.900669899 | 1 | 0.985032959 |
| NEFA 22:5 | 0.040659913  | 0.819601567 | 1 | 0.93421204  | 0.011017706  | 0.087485226 | 1 | 0.733952881 | -0.012739905 | 0.922550601 | 1 | 0.985032959 |
| NEFA 24:2 | 0.171588748  | 0.252255683 | 1 | 0.845683139 | 0.004623144  | 0.385110448 | 1 | 0.784196605 | 0.065290748  | 0.531563648 | 1 | 0.985032959 |
| NEFA 24:3 | 0.060508011  | 0.714518317 | 1 | 0.93421204  | -0.00220332  | 0.713961336 | 1 | 0.932945422 | -0.031384879 | 0.832916162 | 1 | 0.985032959 |
| NEFA 24:4 | 0.044976233  | 0.774973231 | 1 | 0.93421204  | 0.010456722  | 0.065415306 | 1 | 0.733952881 | 0.142960547  | 0.221348473 | 1 | 0.985032959 |
| NEFA 26:0 | -0.164224828 | 0.427786037 | 1 | 0.93421204  | 0.000746867  | 0.918196046 | 1 | 0.971782693 | -0.167483492 | 0.330333442 | 1 | 0.985032959 |
| NEFA 26:3 | -0.053380028 | 0.726140669 | 1 | 0.93421204  | 0.005658367  | 0.308379066 | 1 | 0.783684185 | 0.064007757  | 0.587678536 | 1 | 0.985032959 |
| NEFA 26:4 | -0.005999563 | 0.968792131 | 1 | 0.981471063 | 0.012523415  | 0.024721205 | 1 | 0.645841475 | 0.080408555  | 0.503726548 | 1 | 0.985032959 |
| C14:0     | -0.017452608 | 0.885042985 | 1 | 0.93421204  | -0.001235249 | 0.773644927 | 1 | 0.956734353 | -0.044797662 | 0.635690816 | 1 | 0.985032959 |
| C15:1     | -0.162420265 | 0.434788755 | 1 | 0.93421204  | -0.009325994 | 0.207833699 | 1 | 0.783684185 | -0.249098932 | 0.135825364 | 1 | 0.985032959 |
| C16:0     | -0.06291987  | 0.44086506  | 1 | 0.93421204  | 0.001700412  | 0.556906452 | 1 | 0.889881904 | 0.019197287  | 0.753050119 | 1 | 0.985032959 |
| C16:1 n7  | -0.013589476 | 0.910307045 | 1 | 0.951270862 | 0.000216047  | 0.960146814 | 1 | 0.990592447 | -0.058080445 | 0.50999744  | 1 | 0.985032959 |

|                        |                                            |
|------------------------|--------------------------------------------|
| Obes Facts             |                                            |
| DOI: 10.1159/000453001 | © 2017 The Author(s)<br>www.karger.com/ofa |

Hellmuth et al.: Cord Blood Metabolome Is Highly Associated with Birth Weight, but Less Predictive for Later Weight Development

|          |              |             |             |             |              |             |   |             |              |             |   |             |
|----------|--------------|-------------|-------------|-------------|--------------|-------------|---|-------------|--------------|-------------|---|-------------|
| C17:0    | -0.284575088 | 0.028746462 | 1           | 0.429143615 | 0.003079292  | 0.501202586 | 1 | 0.865713557 | 0.072823289  | 0.445271626 | 1 | 0.985032959 |
| C18:0    | -0.031448739 | 0.704240706 | 1           | 0.93421204  | 0.003938971  | 0.18233478  | 1 | 0.783684185 | 0.015821086  | 0.794435777 | 1 | 0.985032959 |
| C18:1 n9 | -0.171841254 | 0.040232705 | 1           | 0.476287156 | 0.004321422  | 0.147299314 | 1 | 0.783684185 | -0.02516637  | 0.685216771 | 1 | 0.985032959 |
| C18:1 n7 | -0.168371844 | 0.08975818  | 1           | 0.564550669 | 0.006043106  | 0.087890632 | 1 | 0.733952881 | 0.033270659  | 0.652605425 | 1 | 0.985032959 |
| C18:2 n6 | 0.051932509  | 0.635052461 | 1           | 0.93421204  | 0.002367919  | 0.54623657  | 1 | 0.889881904 | 0.023420465  | 0.770994001 | 1 | 0.985032959 |
| C18:3 n6 | -0.132209398 | 0.372160555 | 1           | 0.928258176 | -0.00337254  | 0.522280312 | 1 | 0.884256244 | -0.003276421 | 0.976528269 | 1 | 0.985032959 |
| C18:3 n3 | 0.380781614  | 0.103706758 | 1           | 0.589350043 | 0.007463758  | 0.367378961 | 1 | 0.784196605 | 0.328342304  | 0.059744626 | 1 | 0.985032959 |
| C20:1 n9 | -0.114441388 | 0.575285285 | 1           | 0.93421204  | -8.48E-05    | 0.990737459 | 1 | 0.999300732 | 0.26260713   | 0.087848357 | 1 | 0.985032959 |
| C20:2 n6 | -0.031935173 | 0.829296959 | 1           | 0.93421204  | -0.002784246 | 0.593219413 | 1 | 0.889881904 | 0.215938184  | 0.06042962  | 1 | 0.985032959 |
| C20:3 n9 | -0.802172385 | 0.000522435 | 0.109188902 | 0.109100858 | -0.014903722 | 0.073809873 | 1 | 0.733952881 | 0.098474814  | 0.581103167 | 1 | 0.985032959 |
| C20:3 n6 | 0.025622564  | 0.82320782  | 1           | 0.93421204  | -0.000459339 | 0.910907041 | 1 | 0.971782693 | 0.033284504  | 0.689282699 | 1 | 0.985032959 |
| C20:4 n6 | -0.099805417 | 0.281535786 | 1           | 0.856252495 | 0.00493721   | 0.139082747 | 1 | 0.783684185 | 0.005505386  | 0.935182213 | 1 | 0.985032959 |
| C20:3 n3 | 0.023536248  | 0.883556106 | 1           | 0.93421204  | -0.001664948 | 0.769544422 | 1 | 0.956734353 | 0.115871053  | 0.337955972 | 1 | 0.985032959 |
| C20:5 n3 | 0.031638357  | 0.881992051 | 1           | 0.93421204  | -0.001819586 | 0.812041304 | 1 | 0.964299048 | 0.13378447   | 0.394040548 | 1 | 0.985032959 |
| C22:4 n6 | 0.078825387  | 0.528401608 | 1           | 0.93421204  | 0.003806564  | 0.389995928 | 1 | 0.784196605 | 0.228319664  | 0.016259236 | 1 | 0.985032959 |
| C22:5 n6 | -0.33740147  | 0.038895944 | 1           | 0.476287156 | -0.004628422 | 0.4325227   | 1 | 0.824067275 | 0.23765887   | 0.052454845 | 1 | 0.985032959 |
| C22:5 n3 | 0.354883675  | 0.092278925 | 1           | 0.564550669 | 0.004077603  | 0.58850229  | 1 | 0.889881904 | 0.299654465  | 0.05334624  | 1 | 0.985032959 |
| C22:6 n3 | -0.05969634  | 0.639692864 | 1           | 0.93421204  | 0.004050845  | 0.371865012 | 1 | 0.784196605 | 0.015037336  | 0.872181502 | 1 | 0.985032959 |
| AC C10:0 | -0.183613752 | 0.378327252 | 1           | 0.928258176 | 0.008008784  | 0.274825978 | 1 | 0.783684185 | 0.004610147  | 0.97755191  | 1 | 0.985032959 |
| AC C10:1 | 0.252839815  | 0.219811463 | 1           | 0.805975365 | 0.00725535   | 0.329790461 | 1 | 0.783684185 | -0.033093236 | 0.832293908 | 1 | 0.985032959 |
| AC C12:0 | 0.22102436   | 0.300429424 | 1           | 0.856252495 | 0.014438599  | 0.063605222 | 1 | 0.733952881 | -0.434899578 | 0.010241772 | 1 | 0.985032959 |
| AC C14:1 | 0.106713488  | 0.57150273  | 1           | 0.93421204  | 0.014805365  | 0.029399066 | 1 | 0.665689318 | -0.089078341 | 0.541615838 | 1 | 0.985032959 |
| AC C16:0 | 0.536739357  | 0.013295006 | 1           | 0.348936129 | 0.013075602  | 0.097380848 | 1 | 0.753799896 | 0.151906164  | 0.362398006 | 1 | 0.985032959 |

|                        |                                            |
|------------------------|--------------------------------------------|
| Obes Facts             |                                            |
| DOI: 10.1159/000453001 | © 2017 The Author(s)<br>www.karger.com/ofa |

Hellmuth et al.: Cord Blood Metabolome Is Highly Associated with Birth Weight, but Less Predictive for Later Weight Development

|            |              |             |             |             |              |             |   |             |              |             |   |             |
|------------|--------------|-------------|-------------|-------------|--------------|-------------|---|-------------|--------------|-------------|---|-------------|
| AC C18:1   | 0.392253373  | 0.093629941 | 1           | 0.564550669 | 0.016996533  | 0.046617849 | 1 | 0.733952881 | 0.139757898  | 0.43372395  | 1 | 0.985032959 |
| AC C2:0    | 0.070152459  | 0.670454158 | 1           | 0.93421204  | 0.006910045  | 0.24685454  | 1 | 0.783684185 | -0.053434925 | 0.665747575 | 1 | 0.985032959 |
| AC C3:0    | -0.168304829 | 0.367319063 | 1           | 0.928258176 | 0.014365597  | 0.033861568 | 1 | 0.665689318 | -0.184997549 | 0.198682758 | 1 | 0.985032959 |
| AC C8:1    | 0.379435169  | 0.188546808 | 1           | 0.756577609 | 0.027950889  | 0.007107727 | 1 | 0.623510952 | 0.005934024  | 0.978143776 | 1 | 0.985032959 |
| H1         | -0.4008046   | 0.418318023 | 1           | 0.93421204  | -0.01155989  | 0.522694262 | 1 | 0.884256244 | -0.362374405 | 0.351440125 | 1 | 0.985032959 |
| LPCa C14:0 | 0.035837302  | 0.815419958 | 1           | 0.93421204  | -0.005840143 | 0.293862586 | 1 | 0.783684185 | -0.060717031 | 0.60505691  | 1 | 0.985032959 |
| LPCa C16:0 | -0.074908223 | 0.54294616  | 1           | 0.93421204  | 0.000892516  | 0.840888473 | 1 | 0.967603458 | 0.027570583  | 0.769032112 | 1 | 0.985032959 |
| LPCa C16:1 | -0.053797625 | 0.740134129 | 1           | 0.93421204  | -0.005970147 | 0.300785573 | 1 | 0.783684185 | 0.107725507  | 0.371855482 | 1 | 0.985032959 |
| LPCa C18:0 | -0.095689599 | 0.509343399 | 1           | 0.93421204  | -0.001469805 | 0.778204976 | 1 | 0.956734353 | -0.047357861 | 0.667935911 | 1 | 0.985032959 |
| LPCa C18:1 | -0.247862632 | 0.091653977 | 1           | 0.564550669 | 0.000641748  | 0.903015686 | 1 | 0.971782693 | 0.111008119  | 0.309650922 | 1 | 0.985032959 |
| LPCa C18:2 | -0.026665697 | 0.874404716 | 1           | 0.93421204  | -0.004100748 | 0.497823044 | 1 | 0.865713557 | 0.168325395  | 0.178664573 | 1 | 0.985032959 |
| LPCa C18:3 | 0.428425021  | 0.112670027 | 1           | 0.619685147 | -0.013353852 | 0.168628619 | 1 | 0.783684185 | 0.131069277  | 0.548391029 | 1 | 0.985032959 |
| LPCa C20:3 | -0.150539841 | 0.410480775 | 1           | 0.93421204  | 0.003137699  | 0.632677566 | 1 | 0.901068625 | 0.109962942  | 0.429237318 | 1 | 0.985032959 |
| LPCa C20:4 | -0.185647774 | 0.263334094 | 1           | 0.845683139 | 0.005109507  | 0.389993454 | 1 | 0.784196605 | 0.142703158  | 0.24613971  | 1 | 0.985032959 |
| LPCa C22:6 | -0.201810719 | 0.292074346 | 1           | 0.856252495 | 0.00247139   | 0.719017428 | 1 | 0.932945422 | 0.297225537  | 0.042020153 | 1 | 0.985032959 |
| LPCe C16:0 | -0.279658262 | 0.156053542 | 1           | 0.69394022  | -0.008939277 | 0.206083275 | 1 | 0.783684185 | -0.026297612 | 0.8593328   | 1 | 0.985032959 |
| LPCe C18:0 | -0.653978319 | 0.001044027 | 0.218201716 | 0.109100858 | -0.017411422 | 0.014577027 | 1 | 0.623510952 | -0.115248443 | 0.45147903  | 1 | 0.985032959 |
| LPCe C18:1 | -0.496181189 | 0.069159037 | 1           | 0.563380942 | 0.009400303  | 0.344540064 | 1 | 0.783684185 | -0.036003247 | 0.859099745 | 1 | 0.985032959 |
| PCa C28:2  | 0.089052045  | 0.757149714 | 1           | 0.93421204  | -0.005396477 | 0.589445717 | 1 | 0.889881904 | 0.157727214  | 0.49748658  | 1 | 0.985032959 |
| PCa C30:0  | -0.079289616 | 0.665766046 | 1           | 0.93421204  | -0.005932037 | 0.365799853 | 1 | 0.784196605 | 0.092767862  | 0.494059579 | 1 | 0.985032959 |
| PCa C30:2  | -0.226989737 | 0.188864452 | 1           | 0.756577609 | 0.007636664  | 0.231290758 | 1 | 0.783684185 | -0.039890718 | 0.769843691 | 1 | 0.985032959 |
| PCa C32:0  | -0.02580666  | 0.870079449 | 1           | 0.93421204  | 0.005547731  | 0.327963973 | 1 | 0.783684185 | 0.097661136  | 0.415834912 | 1 | 0.985032959 |
| PCa C32:1  | -0.128020115 | 0.534451632 | 1           | 0.93421204  | -0.002239458 | 0.761741823 | 1 | 0.956734353 | 0.030246587  | 0.845646685 | 1 | 0.985032959 |

|                        |                                            |
|------------------------|--------------------------------------------|
| Obes Facts             |                                            |
| DOI: 10.1159/000453001 | © 2017 The Author(s)<br>www.karger.com/ofa |

Hellmuth et al.: Cord Blood Metabolome Is Highly Associated with Birth Weight, but Less Predictive for Later Weight Development

|           |              |             |   |             |              |             |   |             |              |             |   |             |
|-----------|--------------|-------------|---|-------------|--------------|-------------|---|-------------|--------------|-------------|---|-------------|
| PCa C32:2 | -0.03630581  | 0.828613218 | 1 | 0.93421204  | 0.001347574  | 0.821421882 | 1 | 0.964478502 | -0.038496351 | 0.751293882 | 1 | 0.985032959 |
| PCa C32:3 | -0.036172115 | 0.83088057  | 1 | 0.93421204  | 0.003136225  | 0.608203926 | 1 | 0.889881904 | 0.061764743  | 0.645598246 | 1 | 0.985032959 |
| PCa C34:1 | -0.261171352 | 0.066125683 | 1 | 0.563380942 | 0.004099495  | 0.421168067 | 1 | 0.822655383 | 0.029898743  | 0.78036074  | 1 | 0.985032959 |
| PCa C34:2 | -0.049397422 | 0.752677971 | 1 | 0.93421204  | -0.000540282 | 0.923931972 | 1 | 0.971782693 | 0.020705271  | 0.85636373  | 1 | 0.985032959 |
| PCa C34:3 | -0.040606791 | 0.808304025 | 1 | 0.93421204  | -0.005537078 | 0.355704324 | 1 | 0.784196605 | 0.010691035  | 0.930657549 | 1 | 0.985032959 |
| PCa C34:4 | -0.187595268 | 0.316975834 | 1 | 0.871683544 | -0.006419545 | 0.344414932 | 1 | 0.783684185 | -0.008025104 | 0.9559027   | 1 | 0.985032959 |
| PCa C34:5 | -0.261762276 | 0.471636343 | 1 | 0.93421204  | -0.004308753 | 0.740471315 | 1 | 0.949438679 | 0.155706529  | 0.565057215 | 1 | 0.985032959 |
| PCa C36:1 | -0.27092434  | 0.059023565 | 1 | 0.563380942 | 0.001272858  | 0.804342539 | 1 | 0.96151916  | -0.072525469 | 0.491278162 | 1 | 0.985032959 |
| PCa C36:2 | -0.053271522 | 0.722237139 | 1 | 0.93421204  | 0.000963986  | 0.857933292 | 1 | 0.969232746 | -0.014035837 | 0.895771315 | 1 | 0.985032959 |
| PCa C36:3 | -0.051878522 | 0.732996743 | 1 | 0.93421204  | -0.001958485 | 0.719666758 | 1 | 0.932945422 | 0.013971817  | 0.900935176 | 1 | 0.985032959 |
| PCa C36:4 | -0.20318592  | 0.142488049 | 1 | 0.692558191 | 0.003934804  | 0.433719619 | 1 | 0.824067275 | 0.004131563  | 0.968329382 | 1 | 0.985032959 |
| PCa C36:5 | -0.098230949 | 0.583301716 | 1 | 0.93421204  | -0.003045325 | 0.640511913 | 1 | 0.901068625 | -0.195157309 | 0.145415402 | 1 | 0.985032959 |
| PCa C36:6 | -0.240386378 | 0.367092946 | 1 | 0.928258176 | -0.011782441 | 0.21127288  | 1 | 0.783684185 | -0.164889772 | 0.404932239 | 1 | 0.985032959 |
| PCa C38:0 | -0.23535832  | 0.200112321 | 1 | 0.774508799 | 0.001242547  | 0.851861417 | 1 | 0.967603458 | 0.011210836  | 0.935923303 | 1 | 0.985032959 |
| PCa C38:2 | -0.123525965 | 0.617946742 | 1 | 0.93421204  | 0.007756247  | 0.385568533 | 1 | 0.784196605 | -0.089253797 | 0.640432562 | 1 | 0.985032959 |
| PCa C38:3 | -0.033260047 | 0.815721905 | 1 | 0.93421204  | -0.000797656 | 0.877748795 | 1 | 0.971782693 | -0.066812479 | 0.520574423 | 1 | 0.985032959 |
| PCa C38:4 | -0.12806105  | 0.344226815 | 1 | 0.910676005 | 0.006512814  | 0.185150446 | 1 | 0.783684185 | -0.049361754 | 0.626857773 | 1 | 0.985032959 |
| PCa C38:5 | -0.235844816 | 0.077246215 | 1 | 0.563380942 | 0.001485177  | 0.75667832  | 1 | 0.956734353 | -0.007371822 | 0.940439153 | 1 | 0.985032959 |
| PCa C38:6 | -0.216206677 | 0.162037956 | 1 | 0.705540269 | 0.003197283  | 0.561922096 | 1 | 0.889881904 | -0.044678702 | 0.691932625 | 1 | 0.985032959 |
| PCa C40:0 | -0.261333741 | 0.300616607 | 1 | 0.856252495 | -0.007523548 | 0.403842309 | 1 | 0.796255118 | -0.131274469 | 0.459076032 | 1 | 0.985032959 |
| PCa C40:4 | -0.096194665 | 0.565508893 | 1 | 0.93421204  | -0.000663132 | 0.913789126 | 1 | 0.971782693 | 0.004518507  | 0.971097998 | 1 | 0.985032959 |
| PCa C40:5 | -0.223842384 | 0.251826922 | 1 | 0.845683139 | -0.005310652 | 0.453371092 | 1 | 0.853644669 | 0.003654194  | 0.980319882 | 1 | 0.985032959 |
| PCa C40:6 | -0.180692992 | 0.30317074  | 1 | 0.856252495 | 0.002372031  | 0.706336167 | 1 | 0.932945422 | -0.104202769 | 0.421135741 | 1 | 0.985032959 |

Hellmuth et al.: Cord Blood Metabolome Is Highly Associated with Birth Weight, but Less Predictive for Later Weight Development

|            |              |             |   |             |              |             |   |             |              |             |   |             |
|------------|--------------|-------------|---|-------------|--------------|-------------|---|-------------|--------------|-------------|---|-------------|
| PCa C42:0  | 0.026106869  | 0.919059079 | 1 | 0.955638545 | -0.001291565 | 0.88816037  | 1 | 0.971782693 | 0.144496881  | 0.395486428 | 1 | 0.985032959 |
| PCa C42:1  | -0.387054732 | 0.138857827 | 1 | 0.690982997 | -0.002125397 | 0.820198778 | 1 | 0.964478502 | -0.047515852 | 0.768342728 | 1 | 0.985032959 |
| PCa C42:5  | 0.059043367  | 0.823828323 | 1 | 0.93421204  | -0.002312241 | 0.798101028 | 1 | 0.96151916  | 0.126509286  | 0.51762049  | 1 | 0.985032959 |
| PCa C43:6  | -0.254623369 | 0.206932636 | 1 | 0.786344018 | 0.003559919  | 0.62580749  | 1 | 0.901068625 | 0.000928616  | 0.99506904  | 1 | 0.99506904  |
| PCa C44:12 | -0.36711287  | 0.072044012 | 1 | 0.563380942 | -0.000242312 | 0.973805455 | 1 | 0.990609169 | -0.008540268 | 0.957635831 | 1 | 0.985032959 |
| PCe C32:0  | -0.055821936 | 0.73170018  | 1 | 0.93421204  | -0.006750393 | 0.247910305 | 1 | 0.783684185 | 0.104470774  | 0.390666242 | 1 | 0.985032959 |
| PCe C32:1  | -0.053818969 | 0.738445988 | 1 | 0.93421204  | -0.00078935  | 0.891099961 | 1 | 0.971782693 | -0.027357567 | 0.823079723 | 1 | 0.985032959 |
| PCe C32:2  | -0.295967997 | 0.153522842 | 1 | 0.69394022  | -0.001476173 | 0.846156859 | 1 | 0.967603458 | -0.078541206 | 0.627367854 | 1 | 0.985032959 |
| PCe C34:0  | -0.289745065 | 0.152690486 | 1 | 0.69394022  | -0.000214963 | 0.976389899 | 1 | 0.990609169 | -0.086602098 | 0.55916072  | 1 | 0.985032959 |
| PCe C34:1  | -0.271809128 | 0.078172475 | 1 | 0.563380942 | -0.000631587 | 0.90867413  | 1 | 0.971782693 | 0.054659066  | 0.630458815 | 1 | 0.985032959 |
| PCe C34:2  | -0.074055209 | 0.622672162 | 1 | 0.93421204  | -0.003733855 | 0.487093232 | 1 | 0.865713557 | -0.0379832   | 0.730644805 | 1 | 0.985032959 |
| PCe C34:3  | -0.118717379 | 0.520121701 | 1 | 0.93421204  | -0.007833886 | 0.234455673 | 1 | 0.783684185 | -0.141031245 | 0.299900101 | 1 | 0.985032959 |
| PCe C34:4  | -0.051339162 | 0.880933293 | 1 | 0.93421204  | 0.013056623  | 0.288168622 | 1 | 0.783684185 | -0.183978274 | 0.463159526 | 1 | 0.985032959 |
| PCe C36:0  | -0.004139975 | 0.985423665 | 1 | 0.990161279 | 0.007435894  | 0.361655594 | 1 | 0.784196605 | -0.090120445 | 0.626496312 | 1 | 0.985032959 |
| PCe C36:1  | -0.407288143 | 0.02032797  | 1 | 0.384290165 | -0.003245715 | 0.604033668 | 1 | 0.889881904 | -0.095309544 | 0.473146537 | 1 | 0.985032959 |
| PCe C36:2  | -0.310337967 | 0.062461344 | 1 | 0.563380942 | -0.002667049 | 0.653361519 | 1 | 0.901068625 | -0.015269624 | 0.898575731 | 1 | 0.985032959 |
| PCe C36:3  | -0.033897676 | 0.832034796 | 1 | 0.93421204  | -0.003032384 | 0.598649078 | 1 | 0.889881904 | 0.115446743  | 0.334924569 | 1 | 0.985032959 |
| PCe C36:4  | -0.144105635 | 0.32247712  | 1 | 0.875295039 | -0.002725884 | 0.600871651 | 1 | 0.889881904 | 0.030478444  | 0.778172552 | 1 | 0.985032959 |
| PCe C36:5  | -0.171633255 | 0.275223002 | 1 | 0.856252495 | -0.000268294 | 0.962154386 | 1 | 0.990592447 | -0.016057009 | 0.89112582  | 1 | 0.985032959 |
| PCe C36:6  | 0.3854583    | 0.555499868 | 1 | 0.93421204  | 0.029793797  | 0.209226935 | 1 | 0.783684185 | -0.60139957  | 0.143438423 | 1 | 0.985032959 |
| PCe C38:0  | -0.106040256 | 0.598967424 | 1 | 0.93421204  | -0.008689382 | 0.229522869 | 1 | 0.783684185 | -0.178277563 | 0.230069085 | 1 | 0.985032959 |
| PCe C38:2  | -0.216535416 | 0.437566813 | 1 | 0.93421204  | -0.01488681  | 0.133273924 | 1 | 0.783684185 | -0.243232509 | 0.257915057 | 1 | 0.985032959 |
| PCe C38:3  | -0.088649927 | 0.668378906 | 1 | 0.93421204  | -0.011763578 | 0.108957759 | 1 | 0.755341082 | -0.217339282 | 0.148145585 | 1 | 0.985032959 |



Hellmuth et al.: Cord Blood Metabolome Is Highly Associated with Birth Weight, but Less Predictive for Later Weight Development

|           |              |             |             |             |              |             |   |             |              |             |   |             |
|-----------|--------------|-------------|-------------|-------------|--------------|-------------|---|-------------|--------------|-------------|---|-------------|
| PCe C38:4 | -0.316771087 | 0.022064507 | 1           | 0.384290165 | -0.004878957 | 0.324629516 | 1 | 0.783684185 | -0.064675743 | 0.528306677 | 1 | 0.985032959 |
| PCe C38:5 | -0.267340566 | 0.064807498 | 1           | 0.563380942 | 0.00049958   | 0.923632467 | 1 | 0.971782693 | 0.055784095  | 0.601419219 | 1 | 0.985032959 |
| PCe C38:6 | -0.101070768 | 0.519698728 | 1           | 0.93421204  | -0.001506184 | 0.788644949 | 1 | 0.96151916  | -0.012544507 | 0.916123582 | 1 | 0.985032959 |
| PCe C40:0 | -0.244840926 | 0.094541978 | 1           | 0.564550669 | -0.002877343 | 0.583054396 | 1 | 0.889881904 | -0.061068742 | 0.562738805 | 1 | 0.985032959 |
| PCe C40:1 | 0.324686458  | 0.191859394 | 1           | 0.756577609 | 0.000713995  | 0.93570165  | 1 | 0.975717821 | 0.028162236  | 0.875085598 | 1 | 0.985032959 |
| PCe C40:3 | -0.184900061 | 0.551412935 | 1           | 0.93421204  | -0.000848893 | 0.938369771 | 1 | 0.975717821 | -0.305948248 | 0.140121233 | 1 | 0.985032959 |
| PCe C40:4 | 0.040133976  | 0.817106989 | 1           | 0.93421204  | -0.006571565 | 0.293427056 | 1 | 0.783684185 | -0.13438141  | 0.304863849 | 1 | 0.985032959 |
| PCe C40:5 | -0.100519852 | 0.602133065 | 1           | 0.93421204  | -0.007206168 | 0.295133434 | 1 | 0.783684185 | -0.14126199  | 0.321913521 | 1 | 0.985032959 |
| PCe C40:6 | -0.38188256  | 0.020267017 | 1           | 0.384290165 | -0.004059743 | 0.494361619 | 1 | 0.865713557 | -0.141793768 | 0.248293177 | 1 | 0.985032959 |
| PCe C42:1 | 0.057162892  | 0.854952664 | 1           | 0.93421204  | -0.01479081  | 0.167784386 | 1 | 0.783684185 | 0.234227389  | 0.348616426 | 1 | 0.985032959 |
| PCe C42:2 | 0.321417562  | 0.283749382 | 1           | 0.856252495 | -0.004896946 | 0.644717048 | 1 | 0.901068625 | 0.023282076  | 0.917294224 | 1 | 0.985032959 |
| PCe C42:3 | -0.548607499 | 0.074089369 | 1           | 0.563380942 | -0.011546626 | 0.295086346 | 1 | 0.783684185 | 0.118033707  | 0.557417461 | 1 | 0.985032959 |
| PCe C42:4 | -0.293357941 | 0.150529917 | 1           | 0.69394022  | 0.004301195  | 0.557439927 | 1 | 0.889881904 | -0.13838547  | 0.335543565 | 1 | 0.985032959 |
| PCe C42:5 | 0.000161694  | 0.999400558 | 1           | 0.999400558 | -0.003357546 | 0.661577282 | 1 | 0.901068625 | -0.051956531 | 0.736364799 | 1 | 0.985032959 |
| PCe C42:6 | -0.026185404 | 0.901730242 | 1           | 0.94704332  | -0.004785079 | 0.524630499 | 1 | 0.884256244 | 0.118924438  | 0.46087566  | 1 | 0.985032959 |
| SM C30:1  | 0.108918766  | 0.687674722 | 1           | 0.93421204  | -0.005132132 | 0.603678787 | 1 | 0.889881904 | 0.202521367  | 0.340857176 | 1 | 0.985032959 |
| SM C32:1  | -0.048898177 | 0.734119581 | 1           | 0.93421204  | -0.000781214 | 0.880468022 | 1 | 0.971782693 | 0.10333638   | 0.345301778 | 1 | 0.985032959 |
| SM C32:2  | 0.203155403  | 0.262971444 | 1           | 0.845683139 | -0.002712774 | 0.678835175 | 1 | 0.91533259  | 0.071571959  | 0.602646729 | 1 | 0.985032959 |
| SM C33:1  | -0.419680791 | 0.003453877 | 0.721860383 | 0.180465096 | -0.005247769 | 0.310215801 | 1 | 0.783684185 | 0.058087949  | 0.588470621 | 1 | 0.985032959 |
| SM C34:0  | -0.158733484 | 0.245683764 | 1           | 0.845683139 | -0.000826875 | 0.867973672 | 1 | 0.971782693 | -0.036399242 | 0.735416245 | 1 | 0.985032959 |
| SM C34:1  | -0.070367427 | 0.554242437 | 1           | 0.93421204  | -0.000137038 | 0.97450853  | 1 | 0.990609169 | 0.008423156  | 0.925818825 | 1 | 0.985032959 |
| SM C34:2  | 0.034731684  | 0.806272394 | 1           | 0.93421204  | 0.001823808  | 0.723144299 | 1 | 0.932945422 | 0.045023162  | 0.678715527 | 1 | 0.985032959 |
| SM C35:1  | -0.286755574 | 0.054539843 | 1           | 0.563380942 | -0.009206182 | 0.085708383 | 1 | 0.733952881 | -0.015549686 | 0.890907473 | 1 | 0.985032959 |

Hellmuth et al.: Cord Blood Metabolome Is Highly Associated with Birth Weight, but Less Predictive for Later Weight Development

|          |              |             |   |             |              |             |   |             |              |             |   |             |
|----------|--------------|-------------|---|-------------|--------------|-------------|---|-------------|--------------|-------------|---|-------------|
| SM C36:0 | -0.111011272 | 0.516300173 | 1 | 0.93421204  | 0.010570733  | 0.089044858 | 1 | 0.733952881 | 0.096382931  | 0.483665525 | 1 | 0.985032959 |
| SM C36:1 | -0.058069582 | 0.648362358 | 1 | 0.93421204  | 0.002334463  | 0.611258148 | 1 | 0.889881904 | 0.017103855  | 0.858816571 | 1 | 0.985032959 |
| SM C36:2 | -0.049051181 | 0.734376591 | 1 | 0.93421204  | 0.003800877  | 0.468693963 | 1 | 0.865713557 | 0.039454683  | 0.722237189 | 1 | 0.985032959 |
| SM C36:3 | 0.031516089  | 0.878274801 | 1 | 0.93421204  | 0.008561702  | 0.260607823 | 1 | 0.783684185 | -0.109080964 | 0.475333612 | 1 | 0.985032959 |
| SM C38:1 | -0.35186121  | 0.021974622 | 1 | 0.384290165 | 0.006407521  | 0.242289635 | 1 | 0.783684185 | -0.033407642 | 0.769466721 | 1 | 0.985032959 |
| SM C38:2 | -0.042196606 | 0.772185901 | 1 | 0.93421204  | -7.66E-06    | 0.998834924 | 1 | 0.999300732 | 0.047946274  | 0.65946724  | 1 | 0.985032959 |
| SM C38:3 | 0.062738207  | 0.752000724 | 1 | 0.93421204  | 0.006305114  | 0.374681766 | 1 | 0.784196605 | -0.02383897  | 0.869224024 | 1 | 0.985032959 |
| SM C39:1 | -0.12955454  | 0.461996197 | 1 | 0.93421204  | -0.007506638 | 0.22994374  | 1 | 0.783684185 | 0.008056053  | 0.951583601 | 1 | 0.985032959 |
| SM C40:1 | -0.123399513 | 0.388335617 | 1 | 0.928258176 | 0.001252268  | 0.805099775 | 1 | 0.96151916  | -0.016614151 | 0.881248336 | 1 | 0.985032959 |
| SM C40:2 | -0.065546598 | 0.656647338 | 1 | 0.93421204  | 0.00458925   | 0.390222234 | 1 | 0.784196605 | 0.050704351  | 0.652844616 | 1 | 0.985032959 |
| SM C40:3 | 0.016031715  | 0.947589574 | 1 | 0.975597148 | 0.014894606  | 0.087951107 | 1 | 0.733952881 | 0.13193054   | 0.483251464 | 1 | 0.985032959 |
| SM C40:4 | -0.184909979 | 0.212634309 | 1 | 0.793581616 | 0.005599745  | 0.298089495 | 1 | 0.783684185 | 0.012410414  | 0.913907813 | 1 | 0.985032959 |
| SM C40:5 | 0.108291538  | 0.609186062 | 1 | 0.93421204  | -0.007543245 | 0.326961357 | 1 | 0.783684185 | -0.128943987 | 0.40292432  | 1 | 0.985032959 |
| SM C41:1 | -0.101688547 | 0.540175657 | 1 | 0.93421204  | -0.007089749 | 0.228704782 | 1 | 0.783684185 | 0.019438689  | 0.871469743 | 1 | 0.985032959 |
| SM C41:2 | -0.134188804 | 0.442130514 | 1 | 0.93421204  | -0.007929823 | 0.203453888 | 1 | 0.783684185 | -0.008416842 | 0.948301055 | 1 | 0.985032959 |
| SM C42:1 | 0.025712056  | 0.846308885 | 1 | 0.93421204  | 0.00044948   | 0.925285914 | 1 | 0.971782693 | 0.044957361  | 0.647340513 | 1 | 0.985032959 |
| SM C42:2 | -0.026519419 | 0.843033849 | 1 | 0.93421204  | 0.001722682  | 0.718584926 | 1 | 0.932945422 | 0.10076083   | 0.306552158 | 1 | 0.985032959 |
| SM C42:3 | 0.255792065  | 0.122772136 | 1 | 0.657465483 | 0.001129997  | 0.850589311 | 1 | 0.967603458 | 0.110617318  | 0.379197877 | 1 | 0.985032959 |
| SM C42:4 | -0.057027811 | 0.759281724 | 1 | 0.93421204  | 0.00315274   | 0.636679706 | 1 | 0.901068625 | 0.038643777  | 0.778054312 | 1 | 0.985032959 |
| SM C42:5 | 0.307118902  | 0.307392822 | 1 | 0.85660133  | -0.01069035  | 0.344971029 | 1 | 0.783684185 | 0.020645121  | 0.919190706 | 1 | 0.985032959 |
| SM C42:6 | -0.141908309 | 0.384497464 | 1 | 0.928258176 | 0.003033079  | 0.604620214 | 1 | 0.889881904 | -0.004013925 | 0.974157658 | 1 | 0.985032959 |
| SM C43:2 | -0.283670929 | 0.129023692 | 1 | 0.657706136 | -0.004684087 | 0.490705166 | 1 | 0.865713557 | 0.093961713  | 0.495471872 | 1 | 0.985032959 |
| SM C44:6 | -0.120603163 | 0.676497769 | 1 | 0.93421204  | 0.008153715  | 0.425597982 | 1 | 0.82361091  | -0.047764291 | 0.82491842  | 1 | 0.985032959 |

|                        |                                            |
|------------------------|--------------------------------------------|
| Obes Facts             |                                            |
| DOI: 10.1159/000453001 | © 2017 The Author(s)<br>www.karger.com/ofa |

Hellmuth et al.: Cord Blood Metabolome Is Highly Associated with Birth Weight, but Less Predictive for Later Weight Development

|          |              |             |             |             |              |             |   |             |              |             |   |             |
|----------|--------------|-------------|-------------|-------------|--------------|-------------|---|-------------|--------------|-------------|---|-------------|
| SM C21:2 | 0.112613051  | 0.774674044 | 1           | 0.93421204  | -0.002351986 | 0.870352233 | 1 | 0.971782693 | 0.244369703  | 0.378107963 | 1 | 0.985032959 |
| SM C31:1 | 0.224064515  | 0.573234985 | 1           | 0.93421204  | -0.022433174 | 0.11974674  | 1 | 0.755341082 | -0.19389939  | 0.41657898  | 1 | 0.985032959 |
| SM C35:2 | -0.007355225 | 0.972078996 | 1           | 0.981471063 | 0.003285608  | 0.658764236 | 1 | 0.901068625 | 0.20535105   | 0.217850657 | 1 | 0.985032959 |
| SM C37:2 | -0.180447307 | 0.483945737 | 1           | 0.93421204  | 0.004219747  | 0.648254786 | 1 | 0.901068625 | -0.015583713 | 0.932014005 | 1 | 0.985032959 |
| SM C37:3 | 0.012921065  | 0.960495832 | 1           | 0.979237214 | 0.001854068  | 0.842124246 | 1 | 0.967603458 | -0.103511861 | 0.606407676 | 1 | 0.985032959 |
| SM C39:4 | -0.157873545 | 0.529413519 | 1           | 0.93421204  | 0.012096858  | 0.180309718 | 1 | 0.783684185 | -0.27272816  | 0.106538385 | 1 | 0.985032959 |
| SM C39:5 | -0.149261307 | 0.4630473   | 1           | 0.93421204  | -0.001489816 | 0.839425715 | 1 | 0.967603458 | 0.022700251  | 0.884864394 | 1 | 0.985032959 |
| SM C41:5 | -0.773038176 | 0.002126123 | 0.444359777 | 0.148119926 | 0.022477684  | 0.012555837 | 1 | 0.623510952 | 0.031798591  | 0.85438809  | 1 | 0.985032959 |
| SM C43:0 | -0.052422823 | 0.841445455 | 1           | 0.93421204  | -0.002733593 | 0.767108501 | 1 | 0.956734353 | -0.075964043 | 0.690753915 | 1 | 0.985032959 |

Hellmuth et al.: Cord Blood Metabolome Is Highly Associated with Birth Weight, but Less Predictive for Later Weight Development

**Supplemental table 5.** Linear regression models **without adjusting for birthweight**, which were performed to avoid over adjustment.

| nam      | n   | BMI 2 years  |             |        |             | BMI 15 years |             |             |        |             |
|----------|-----|--------------|-------------|--------|-------------|--------------|-------------|-------------|--------|-------------|
|          |     | beta         | p           | p_bonf | p_fdr       | n            | beta        | p           | p_bonf | p_fdr       |
| AC C10:0 | 585 | 0.032060688  | 0.697745811 | 1      | 0.994294111 | 425          | 0.003311389 | 0.972189124 | 1      | 0.991158668 |
|          |     |              |             |        |             |              |             | -           |        |             |
| AC C10:1 | 567 | -0.039859851 | 0.646080447 | 1      | 0.994294111 | 410          | 0.013755825 | 0.894201893 | 1      | 0.953511202 |
| AC C12:0 | 601 | 0.034951491  | 0.636679639 | 1      | 0.994294111 | 422          | 0.073294115 | 0.396264711 | 1      | 0.923166264 |
| AC C14:1 | 638 | 0.075501451  | 0.336438154 | 1      | 0.994294111 | 457          | 0.127091264 | 0.154010938 | 1      | 0.701475916 |
| AC C16:0 | 643 | -0.037561507 | 0.592324971 | 1      | 0.994294111 | 460          | 0.119985659 | 0.140166752 | 1      | 0.701475916 |
| AC C18:1 | 611 | 0.06296121   | 0.324701182 | 1      | 0.994294111 | 432          | 0.140081781 | 0.06996474  | 1      | 0.701475916 |
| AC C2:0  | 640 | -0.004665185 | 0.958907333 | 1      | 0.994294111 | 459          | 0.030130596 | 0.782292733 | 1      | 0.953105341 |
| AC C3:0  | 642 | 0.037996089  | 0.640508313 | 1      | 0.994294111 | 459          | 0.028416753 | 0.757126989 | 1      | 0.953105341 |
|          |     |              |             |        |             |              |             | -           |        |             |
| AC C8:1  | 642 | -0.044791872 | 0.393647608 | 1      | 0.994294111 | 459          | 0.009970932 | 0.868116673 | 1      | 0.953105341 |
| Ala      | 643 | 0.096620818  | 0.392087337 | 1      | 0.994294111 | 460          | 0.156099966 | 0.242778271 | 1      | 0.874838942 |
| Arg      | 643 | 0.059555647  | 0.310492586 | 1      | 0.994294111 | 461          | 0.022823463 | 0.743560646 | 1      | 0.953105341 |
| Asn      | 643 | 0.116133477  | 0.265605425 | 1      | 0.994294111 | 461          | 0.157947128 | 0.203350168 | 1      | 0.809600815 |
|          |     |              |             |        |             |              |             | -           |        |             |
| Asp      | 640 | 0.009787948  | 0.885569529 | 1      | 0.994294111 | 458          | 0.012987297 | 0.873213975 | 1      | 0.953105341 |

Hellmuth et al.: Cord Blood Metabolome Is Highly Associated with Birth Weight, but Less Predictive for Later Weight Development

|          |     |              |             |   |             |     |             |             |   |             |
|----------|-----|--------------|-------------|---|-------------|-----|-------------|-------------|---|-------------|
| C14:0    | 634 | 0.135818587  | 0.274056462 | 1 | 0.994294111 | 452 | 0.087766442 | 0.541656169 | 1 | 0.953105341 |
| C15:1    | 636 | 0.091995579  | 0.193780471 | 1 | 0.994294111 | 453 | 0.108535391 | 0.182580035 | 1 | 0.772054724 |
| C16:0    | 643 | 0.086176773  | 0.637836673 | 1 | 0.994294111 | 459 | 0.030114455 | 0.889260964 | 1 | 0.953105341 |
| C16:1 n7 | 643 | 0.113613148  | 0.361488235 | 1 | 0.994294111 | 460 | 0.021942655 | 0.882716189 | 1 | 0.953105341 |
| C17:0    | 633 | 0.039931787  | 0.730955215 | 1 | 0.994294111 | 451 | 0.054556453 | 0.700026323 | 1 | 0.953105341 |
| C18:0    | 643 | 4.91876E-05  | 0.999782578 | 1 | 0.999782578 | 459 | 0.015139588 | 0.944375624 | 1 | 0.986872527 |
| C18:1 n7 | 644 | 0.056053059  | 0.712862425 | 1 | 0.994294111 | 460 | 0.168222881 | 0.345993599 | 1 | 0.921550027 |
| C18:1 n9 | 642 | 0.244497066  | 0.171854891 | 1 | 0.994294111 | 459 | 0.075415364 | 0.718897009 | 1 | 0.953105341 |
| C18:2 n6 | 643 | 0.00492461   | 0.971317181 | 1 | 0.994294111 | 459 | 0.058970586 | 0.715833454 | 1 | 0.953105341 |
| C18:3 n3 | 628 | -0.024205885 | 0.707719224 | 1 | 0.994294111 | 448 | 0.04625399  | 0.542575352 | 1 | 0.953105341 |
| C18:3 n6 | 633 | 0.076781206  | 0.446335944 | 1 | 0.994294111 | 451 | 0.026839641 | 0.821987549 | 1 | 0.953105341 |
| C20:1 n9 | 606 | 0.030987782  | 0.698406239 | 1 | 0.994294111 | 433 | 0.001099489 | 0.990688083 | 1 | 0.995854424 |



|                        |                                            |
|------------------------|--------------------------------------------|
| Obes Facts             |                                            |
| DOI: 10.1159/000453001 | © 2017 The Author(s)<br>www.karger.com/ofa |

Hellmuth et al.: Cord Blood Metabolome Is Highly Associated with Birth Weight, but Less Predictive for Later Weight Development

|            |     |              |             |   |             |     |             |             |   |             |
|------------|-----|--------------|-------------|---|-------------|-----|-------------|-------------|---|-------------|
| Glu        | 583 | 0.061462639  | 0.59165742  | 1 | 0.994294111 | 418 | 0.141605222 | 0.315880651 | 1 | 0.921550027 |
| Gly        | 644 | -0.004524618 | 0.96868735  | 1 | 0.994294111 | 461 | 0.026179953 | 0.848414326 | 1 | 0.953105341 |
|            |     |              |             |   |             |     |             | -           |   |             |
| H1         | 627 | -0.024587635 | 0.415965116 | 1 | 0.994294111 | 449 | 0.005245741 | 0.88407765  | 1 | 0.953105341 |
| His        | 643 | 0.1152553    | 0.354775213 | 1 | 0.994294111 | 460 | 0.007408672 | 0.959578348 | 1 | 0.991158668 |
| Ile        | 642 | 0.091782147  | 0.501046034 | 1 | 0.994294111 | 459 | 0.300257637 | 0.061429454 | 1 | 0.701475916 |
| Leu        | 642 | 0.12095699   | 0.386133997 | 1 | 0.994294111 | 460 | 0.327880331 | 0.046823625 | 1 | 0.675685877 |
|            |     |              |             |   |             |     |             | -           |   |             |
| LPCa C14:0 | 641 | 0.085922003  | 0.381521005 | 1 | 0.994294111 | 458 | 0.001250274 | 0.991089571 | 1 | 0.995854424 |
| LPCa C16:0 | 642 | 0.01481148   | 0.904644006 | 1 | 0.994294111 | 459 | -0.04069348 | 0.774627207 | 1 | 0.953105341 |
|            |     |              |             |   |             |     |             | -           |   |             |
| LPCa C16:1 | 642 | 0.12436304   | 0.186410547 | 1 | 0.994294111 | 460 | 0.039656005 | 0.710492901 | 1 | 0.953105341 |
|            |     |              |             |   |             |     |             | -           |   |             |
| LPCa C18:0 | 643 | -0.002317635 | 0.982252522 | 1 | 0.994294111 | 460 | 0.117773231 | 0.335980266 | 1 | 0.921550027 |
|            |     |              |             |   |             |     |             | -           |   |             |
| LPCa C18:1 | 644 | 0.094364385  | 0.362349612 | 1 | 0.994294111 | 461 | 0.025771001 | 0.828134549 | 1 | 0.953105341 |
|            |     |              |             |   |             |     |             | -           |   |             |
| LPCa C18:2 | 642 | 0.064083122  | 0.480987777 | 1 | 0.994294111 | 459 | 0.059806609 | 0.568747784 | 1 | 0.953105341 |
|            |     |              |             |   |             |     |             | -           |   |             |
| LPCa C18:3 | 535 | 0.094020761  | 0.154639149 | 1 | 0.994294111 | 381 | 0.022222166 | 0.7571311   | 1 | 0.953105341 |
| LPCa C20:3 | 642 | 0.040855703  | 0.622702058 | 1 | 0.994294111 | 459 | 0.035309418 | 0.709419253 | 1 | 0.953105341 |

Hellmuth et al.: Cord Blood Metabolome Is Highly Associated with Birth Weight, but Less Predictive for Later Weight Development

|            |     |              |             |   |             |     |             |             |   |             |
|------------|-----|--------------|-------------|---|-------------|-----|-------------|-------------|---|-------------|
| LPCa C20:4 | 641 | 0.028483912  | 0.758030334 | 1 | 0.994294111 | 458 | 0.099823001 | 0.355175073 | 1 | 0.921550027 |
|            |     |              |             |   |             |     |             | -           |   |             |
| LPCa C22:6 | 581 | -0.030740051 | 0.72577723  | 1 | 0.994294111 | 409 | 0.045097749 | 0.653240925 | 1 | 0.953105341 |
|            |     |              |             |   |             |     |             | -           |   |             |
| LPCe C16:0 | 612 | 0.177944645  | 0.023184299 | 1 | 0.994294111 | 434 | 0.045808374 | 0.623905178 | 1 | 0.953105341 |
|            |     |              |             |   |             |     |             | -           |   |             |
| LPCe C18:0 | 638 | 0.001271843  | 0.986704541 | 1 | 0.994294111 | 457 | 0.237358637 | 0.007231398 | 1 | 0.651107458 |
|            |     |              |             |   |             |     |             | -           |   |             |
| LPCe C18:1 | 362 | 0.189020352  | 0.047298942 | 1 | 0.994294111 | 251 | 0.045915151 | 0.683042547 | 1 | 0.953105341 |
| Lys        | 534 | 0.088460612  | 0.569270647 | 1 | 0.994294111 | 381 | 0.166585032 | 0.35652516  | 1 | 0.921550027 |
| Met        | 644 | 0.056317103  | 0.631089772 | 1 | 0.994294111 | 460 | 0.122161805 | 0.392219273 | 1 | 0.923166264 |
| NEFA C12:0 | 642 | 0.010267663  | 0.834941013 | 1 | 0.994294111 | 460 | 0.028399451 | 0.598873672 | 1 | 0.953105341 |
| NEFA C14:0 | 642 | 0.009453772  | 0.865522028 | 1 | 0.994294111 | 459 | 0.087022867 | 0.162628625 | 1 | 0.708112137 |
| NEFA C14:1 | 644 | 0.030485086  | 0.515084738 | 1 | 0.994294111 | 460 | 0.085001546 | 0.10804294  | 1 | 0.701475916 |
| NEFA C15:0 | 640 | 0.000845043  | 0.989536723 | 1 | 0.994294111 | 458 | 0.066720228 | 0.35950286  | 1 | 0.921550027 |
| NEFA C15:1 | 563 | -0.004001045 | 0.942810378 | 1 | 0.994294111 | 400 | 0.084713227 | 0.190066153 | 1 | 0.77889855  |
| NEFA C16:0 | 642 | -0.04381706  | 0.646262674 | 1 | 0.994294111 | 459 | 0.164049616 | 0.128517133 | 1 | 0.701475916 |
| NEFA C16:1 | 644 | 0.010797851  | 0.843641239 | 1 | 0.994294111 | 461 | 0.115742793 | 0.060568182 | 1 | 0.701475916 |
| NEFA C16:2 | 583 | 0.053741437  | 0.448205276 | 1 | 0.994294111 | 418 | 0.11731036  | 0.144035416 | 1 | 0.701475916 |
| NEFA C16:3 | 515 | 0.02591242   | 0.756541277 | 1 | 0.994294111 | 367 | 0.05938214  | 0.548888711 | 1 | 0.953105341 |
| NEFA C17:0 | 640 | 0.068048247  | 0.473114401 | 1 | 0.994294111 | 458 | 0.154161132 | 0.150220883 | 1 | 0.701475916 |



Hellmuth et al.: Cord Blood Metabolome Is Highly Associated with Birth Weight, but Less Predictive for Later Weight Development

|            |     |              |             |   |             |     |             |             |   |             |
|------------|-----|--------------|-------------|---|-------------|-----|-------------|-------------|---|-------------|
| NEFA C17:1 | 641 | 0.045120921  | 0.523423209 | 1 | 0.994294111 | 458 | 0.179425506 | 0.025394385 | 1 | 0.651107458 |
| NEFA C18:0 | 639 | 0.005650225  | 0.959521528 | 1 | 0.994294111 | 458 | 0.060958974 | 0.634393956 | 1 | 0.953105341 |
| NEFA C18:1 | 642 | 0.03659799   | 0.624289265 | 1 | 0.994294111 | 459 | 0.185596553 | 0.028644693 | 1 | 0.651107458 |
| NEFA C18:2 | 642 | 0.012069126  | 0.866867272 | 1 | 0.994294111 | 459 | 0.116206109 | 0.154952037 | 1 | 0.701475916 |
| NEFA C18:3 | 641 | 0.043161464  | 0.453339397 | 1 | 0.994294111 | 458 | 0.081704765 | 0.209179158 | 1 | 0.809600815 |
| NEFA C18:4 | 574 | 0.013674164  | 0.811785657 | 1 | 0.994294111 | 413 | 0.037950417 | 0.55640912  | 1 | 0.953105341 |
| NEFA C19:1 | 642 | 0.077983461  | 0.319960891 | 1 | 0.994294111 | 459 | 0.175907246 | 0.044983206 | 1 | 0.675685877 |
| -          |     |              |             |   |             |     |             |             |   |             |
| NEFA C20:0 | 511 | 0.061376764  | 0.562310401 | 1 | 0.994294111 | 364 | 0.010300787 | 0.936009418 | 1 | 0.983045067 |
| NEFA C20:1 | 642 | 0.016232165  | 0.856152856 | 1 | 0.994294111 | 459 | 0.217984079 | 0.033874226 | 1 | 0.651107458 |
| NEFA C20:2 | 567 | 0.010829622  | 0.894903343 | 1 | 0.994294111 | 399 | 0.229575744 | 0.021155288 | 1 | 0.651107458 |
| NEFA C20:3 | 613 | -0.078270569 | 0.372836136 | 1 | 0.994294111 | 435 | 0.190758995 | 0.074026331 | 1 | 0.701475916 |
| NEFA C20:4 | 642 | -0.16827823  | 0.055562644 | 1 | 0.994294111 | 460 | 0.178457794 | 0.098863585 | 1 | 0.701475916 |
| NEFA C20:5 | 585 | -0.033025844 | 0.586273496 | 1 | 0.994294111 | 418 | 0.081111255 | 0.259745505 | 1 | 0.875593718 |
| -          |     |              |             |   |             |     |             |             |   |             |
| NEFA C22:0 | 534 | 0.012725602  | 0.847340309 | 1 | 0.994294111 | 375 | 0.040519288 | 0.600824461 | 1 | 0.953105341 |
| NEFA C22:1 | 571 | 0.161225813  | 0.041907221 | 1 | 0.994294111 | 402 | 0.182163043 | 0.051727148 | 1 | 0.675685877 |
| NEFA C22:2 | 561 | 0.157848871  | 0.104797056 | 1 | 0.994294111 | 395 | 0.189411063 | 0.093846884 | 1 | 0.701475916 |
| NEFA C22:3 | 499 | 0.023560904  | 0.822205183 | 1 | 0.994294111 | 355 | 0.203153416 | 0.103012808 | 1 | 0.701475916 |
| NEFA C22:4 | 643 | -0.177539123 | 0.06801196  | 1 | 0.994294111 | 460 | 0.231284689 | 0.048948984 | 1 | 0.675685877 |
| NEFA C22:5 | 643 | -0.047981803 | 0.577091502 | 1 | 0.994294111 | 460 | 0.185552312 | 0.069860313 | 1 | 0.701475916 |

Hellmuth et al.: Cord Blood Metabolome Is Highly Associated with Birth Weight, but Less Predictive for Later Weight Development

|            |     |              |             |   |             |     |             |             |   |             |
|------------|-----|--------------|-------------|---|-------------|-----|-------------|-------------|---|-------------|
| NEFA C22:6 | 642 | -0.119113983 | 0.179927158 | 1 | 0.994294111 | 460 | 0.159932001 | 0.134939385 | 1 | 0.701475916 |
| NEFA C24:1 | 614 | 0.145511646  | 0.211178333 | 1 | 0.994294111 | 435 | 0.361230912 | 0.007515562 | 1 | 0.651107458 |
| NEFA C24:2 | 469 | 0.113686634  | 0.415981827 | 1 | 0.994294111 | 335 | 0.143209966 | 0.361565082 | 1 | 0.921550027 |
| NEFA C24:3 | 484 | 0.105909443  | 0.388048423 | 1 | 0.994294111 | 355 | 0.234862658 | 0.086997028 | 1 | 0.701475916 |
| NEFA C24:4 | 643 | 0.041072864  | 0.674290285 | 1 | 0.994294111 | 460 | 0.267896327 | 0.018907006 | 1 | 0.651107458 |
| -          |     |              |             |   |             |     |             |             |   |             |
| NEFA C26:0 | 532 | 0.190238104  | 0.027210658 | 1 | 0.994294111 | 379 | 0.014272566 | 0.889129158 | 1 | 0.953105341 |
| NEFA C26:3 | 557 | 0.046771689  | 0.690493228 | 1 | 0.994294111 | 394 | 0.126718143 | 0.341794874 | 1 | 0.921550027 |
| NEFA C26:4 | 459 | 0.138528749  | 0.305230933 | 1 | 0.994294111 | 333 | 0.194169216 | 0.219943022 | 1 | 0.818679112 |
| Orn        | 643 | 0.09091909   | 0.314558882 | 1 | 0.994294111 | 459 | 0.064330787 | 0.553411232 | 1 | 0.953105341 |
| PCa C28:2  | 496 | 0.02907976   | 0.666191273 | 1 | 0.994294111 | 347 | 0.047915939 | 0.563216206 | 1 | 0.953105341 |
| PCa C30:0  | 642 | 0.048358933  | 0.560395839 | 1 | 0.994294111 | 459 | 0.055617603 | 0.578187251 | 1 | 0.953105341 |
| PCa C30:2  | 609 | 0.035536886  | 0.702453779 | 1 | 0.994294111 | 433 | 0.136582944 | 0.184702087 | 1 | 0.772054724 |
| PCa C32:0  | 644 | -0.072825527 | 0.444830162 | 1 | 0.994294111 | 461 | 0.094714495 | 0.401952775 | 1 | 0.923166264 |
| -          |     |              |             |   |             |     |             |             |   |             |
| PCa C32:1  | 642 | -0.038736658 | 0.602218525 | 1 | 0.994294111 | 460 | 0.003471641 | 0.967821744 | 1 | 0.991158668 |
| PCa C32:2  | 638 | 0.061983123  | 0.505069233 | 1 | 0.994294111 | 457 | 0.056108774 | 0.613807267 | 1 | 0.953105341 |
| PCa C32:3  | 632 | -0.030894933 | 0.733992629 | 1 | 0.994294111 | 449 | 0.022540905 | 0.827580445 | 1 | 0.953105341 |
| PCa C34:1  | 643 | 0.009181828  | 0.932105212 | 1 | 0.994294111 | 460 | 0.029355085 | 0.812940631 | 1 | 0.953105341 |
| -          |     |              |             |   |             |     |             |             |   |             |
| PCa C34:2  | 641 | -0.044319438 | 0.654045114 | 1 | 0.994294111 | 458 | 0.034714818 | 0.766037627 | 1 | 0.953105341 |

Hellmuth et al.: Cord Blood Metabolome Is Highly Associated with Birth Weight, but Less Predictive for Later Weight Development

|           |     |              |             |   |             |     |             |             |   |             |
|-----------|-----|--------------|-------------|---|-------------|-----|-------------|-------------|---|-------------|
| PCa C34:3 | 643 | -0.084927899 | 0.355823141 | 1 | 0.994294111 | 460 | 0.076473441 | 0.479777215 | 1 | 0.953105341 |
| PCa C34:4 | 642 | -0.054447994 | 0.496606363 | 1 | 0.994294111 | 459 | 0.079067185 | 0.393007659 | 1 | 0.923166264 |
| PCa C34:5 | 437 | -0.049543319 | 0.408142521 | 1 | 0.994294111 | 303 | 0.017217744 | 0.815227607 | 1 | 0.953105341 |
| PCa C36:1 | 641 | 0.036796241  | 0.731718023 | 1 | 0.994294111 | 458 | 0.025372534 | 0.840595949 | 1 | 0.953105341 |
| PCa C36:2 | 640 | 0.002661463  | 0.979539763 | 1 | 0.994294111 | 457 | 0.034420971 | 0.781608446 | 1 | 0.953105341 |
| PCa C36:3 | 641 | 0.021457931  | 0.830443767 | 1 | 0.994294111 | 458 | 0.034748012 | 0.76573762  | 1 | 0.953105341 |
| PCa C36:4 | 642 | -0.072637012 | 0.505219324 | 1 | 0.994294111 | 459 | 0.029518992 | 0.818258265 | 1 | 0.953105341 |
| PCa C36:5 | 643 | -0.041806673 | 0.619373362 | 1 | 0.994294111 | 460 | 0.054199715 | 0.588735121 | 1 | 0.953105341 |
| PCa C36:6 | 589 | 0.104758704  | 0.093867032 | 1 | 0.994294111 | 419 | 0.091501434 | 0.216292695 | 1 | 0.818679112 |
| PCa C38:0 | 638 | -0.033131746 | 0.691299371 | 1 | 0.994294111 | 456 | 0.157970324 | 0.104317247 | 1 | 0.701475916 |
| PCa C38:2 | 540 | 0.019363731  | 0.784420732 | 1 | 0.994294111 | 376 | 0.042588118 | 0.608200523 | 1 | 0.953105341 |
| PCa C38:3 | 641 | 0.002074601  | 0.98439171  | 1 | 0.994294111 | 458 | 0.023229418 | 0.854498384 | 1 | 0.953105341 |
| PCa C38:4 | 642 | -0.067607988 | 0.544083111 | 1 | 0.994294111 | 460 | 0.085153655 | 0.521554331 | 1 | 0.953105341 |
| PCa C38:5 | 639 | 0.038859773  | 0.736304751 | 1 | 0.994294111 | 458 | -           | 0.781863867 | 1 | 0.953105341 |

|                        |                                            |
|------------------------|--------------------------------------------|
| Obes Facts             |                                            |
| DOI: 10.1159/000453001 | © 2017 The Author(s)<br>www.karger.com/ofa |

Hellmuth et al.: Cord Blood Metabolome Is Highly Associated with Birth Weight, but Less Predictive for Later Weight Development

|            |     |              |             |   |             |     | 0.037838677 |             |   |             |  |
|------------|-----|--------------|-------------|---|-------------|-----|-------------|-------------|---|-------------|--|
|            |     |              |             |   |             |     | -           |             |   |             |  |
| PCa C38:6  | 640 | -0.006566061 | 0.947253218 | 1 | 0.994294111 | 458 | 0.031736667 | 0.786616482 | 1 | 0.953105341 |  |
|            |     |              |             |   |             |     | -           |             |   |             |  |
| PCa C40:0  | 506 | -0.056835081 | 0.444287936 | 1 | 0.994294111 | 351 | 0.133850666 | 0.129312532 | 1 | 0.701475916 |  |
|            |     |              |             |   |             |     | -3.50701E-  |             |   |             |  |
| PCa C40:4  | 616 | -0.021641344 | 0.812586627 | 1 | 0.994294111 | 437 | 05          | 0.99974164  | 1 | 0.99974164  |  |
|            |     |              |             |   |             |     | -           |             |   |             |  |
| PCa C40:5  | 643 | 0.054484813  | 0.480884753 | 1 | 0.994294111 | 460 | 0.026412489 | 0.769664772 | 1 | 0.953105341 |  |
|            |     |              |             |   |             |     | -           |             |   |             |  |
| PCa C40:6  | 642 | -0.004112059 | 0.961938529 | 1 | 0.994294111 | 460 | 0.038888976 | 0.702227074 | 1 | 0.953105341 |  |
|            |     |              |             |   |             |     | -           |             |   |             |  |
| PCa C42:0  | 440 | -0.096511583 | 0.258778221 | 1 | 0.994294111 | 308 | 0.041478507 | 0.677200271 | 1 | 0.953105341 |  |
|            |     |              |             |   |             |     | -           |             |   |             |  |
| PCa C42:1  | 343 | -0.056493255 | 0.599285614 | 1 | 0.994294111 | 237 | 0.199366749 | 0.121106873 | 1 | 0.701475916 |  |
|            |     |              |             |   |             |     | -           |             |   |             |  |
| PCa C42:5  | 342 | -0.103310364 | 0.331186889 | 1 | 0.994294111 | 239 | 0.315659487 | 0.009645399 | 1 | 0.651107458 |  |
|            |     |              |             |   |             |     | -           |             |   |             |  |
| PCa C43:6  | 607 | -0.071197207 | 0.361547298 | 1 | 0.994294111 | 430 | 0.028629174 | 0.755194842 | 1 | 0.953105341 |  |
|            |     |              |             |   |             |     | -           |             |   |             |  |
| PCa C44:12 | 608 | -0.133131613 | 0.085428064 | 1 | 0.994294111 | 432 | 0.060225743 | 0.500263329 | 1 | 0.953105341 |  |

|                        |                                            |
|------------------------|--------------------------------------------|
| Obes Facts             |                                            |
| DOI: 10.1159/000453001 | © 2017 The Author(s)<br>www.karger.com/ofa |

Hellmuth et al.: Cord Blood Metabolome Is Highly Associated with Birth Weight, but Less Predictive for Later Weight Development

|           |     |              |             |   |             |     |             |             |   |             |
|-----------|-----|--------------|-------------|---|-------------|-----|-------------|-------------|---|-------------|
| PCe C32:0 | 644 | 0.055604264  | 0.553694505 | 1 | 0.994294111 | 461 | 0.031321696 | 0.77614384  | 1 | 0.953105341 |
| PCe C32:1 | 644 | -0.043875903 | 0.642616439 | 1 | 0.994294111 | 461 | 0.037739798 | 0.733782487 | 1 | 0.953105341 |
| PCe C32:2 | 609 | -0.013079273 | 0.864023092 | 1 | 0.994294111 | 434 | 0.016665827 | 0.849376929 | 1 | 0.953105341 |
| PCe C34:0 | 644 | -0.013724048 | 0.85614613  | 1 | 0.994294111 | 461 | 0.021781265 | 0.809189454 | 1 | 0.953105341 |
| PCe C34:1 | 642 | -0.027303026 | 0.785648654 | 1 | 0.994294111 | 459 | 0.016644718 | 0.887651561 | 1 | 0.953105341 |
| PCe C34:2 | 642 | -0.03936074  | 0.703141309 | 1 | 0.994294111 | 459 | 0.050639222 | 0.675622171 | 1 | 0.953105341 |
| PCe C34:3 | 642 | -0.136317333 | 0.099887448 | 1 | 0.994294111 | 459 | 0.101812831 | 0.301676272 | 1 | 0.921550027 |
| PCe C34:4 | 541 | 0.070020266  | 0.194138805 | 1 | 0.994294111 | 387 | 0.134832711 | 0.023613836 | 1 | 0.651107458 |
| PCe C36:0 | 522 | 0.011506068  | 0.886463295 | 1 | 0.994294111 | 363 | 0.024541131 | 0.801901416 | 1 | 0.953105341 |
| PCe C36:1 | 642 | 0.022955264  | 0.790114038 | 1 | 0.994294111 | 459 | 0.064058732 | 0.527039436 | 1 | 0.953105341 |
| PCe C36:2 | 641 | 0.02379315   | 0.797576686 | 1 | 0.994294111 | 458 | -           | 0.336033515 | 1 | 0.921550027 |

|                        |                                            |
|------------------------|--------------------------------------------|
| Obes Facts             |                                            |
| DOI: 10.1159/000453001 | © 2017 The Author(s)<br>www.karger.com/ofa |

Hellmuth et al.: Cord Blood Metabolome Is Highly Associated with Birth Weight, but Less Predictive for Later Weight Development

0.108326147

|           |     |              |             |   |             |     |             |             |   |             |  |
|-----------|-----|--------------|-------------|---|-------------|-----|-------------|-------------|---|-------------|--|
|           |     |              |             |   |             |     |             |             |   |             |  |
|           |     |              |             |   |             |     |             |             |   |             |  |
| PCe C36:3 | 640 | 0.024224555  | 0.799172737 | 1 | 0.994294111 | 458 | 0.135199878 | 0.223276121 | 1 | 0.818679112 |  |
| PCe C36:4 | 642 | -0.093269967 | 0.379223485 | 1 | 0.994294111 | 459 | -0.04256928 | 0.732781007 | 1 | 0.953105341 |  |
|           |     |              |             |   |             |     |             |             |   |             |  |
| PCe C36:5 | 642 | -0.115382544 | 0.237941508 | 1 | 0.994294111 | 459 | 0.054227078 | 0.640319846 | 1 | 0.953105341 |  |
|           |     |              |             |   |             |     |             |             |   |             |  |
| PCe C36:6 | 366 | -0.024913316 | 0.528742877 | 1 | 0.994294111 | 255 | 0.030346916 | 0.548540574 | 1 | 0.953105341 |  |
|           |     |              |             |   |             |     |             |             |   |             |  |
| PCe C38:0 | 639 | -0.072086587 | 0.349544331 | 1 | 0.994294111 | 458 | 0.015767425 | 0.86217769  | 1 | 0.953105341 |  |
|           |     |              |             |   |             |     |             |             |   |             |  |
| PCe C38:2 | 632 | 0.0280139    | 0.615072905 | 1 | 0.994294111 | 452 | 0.067404191 | 0.29869206  | 1 | 0.921550027 |  |
|           |     |              |             |   |             |     |             |             |   |             |  |
| PCe C38:3 | 634 | 0.015889449  | 0.832148442 | 1 | 0.994294111 | 453 | 0.062078029 | 0.491711158 | 1 | 0.953105341 |  |
|           |     |              |             |   |             |     |             |             |   |             |  |
| PCe C38:4 | 641 | -0.076830699 | 0.489211139 | 1 | 0.994294111 | 459 | 0.127218767 | 0.329967059 | 1 | 0.921550027 |  |
|           |     |              |             |   |             |     |             |             |   |             |  |
| PCe C38:5 | 641 | -0.058539052 | 0.581234731 | 1 | 0.994294111 | 458 | 0.098241253 | 0.433978723 | 1 | 0.953105341 |  |
|           |     |              |             |   |             |     |             |             |   |             |  |
| PCe C38:6 | 642 | -0.051475991 | 0.59717926  | 1 | 0.994294111 | 460 | 0.127439583 | 0.258313949 | 1 | 0.875593718 |  |
| PCe C40:0 | 640 | -0.002966538 | 0.976947842 | 1 | 0.994294111 | 459 | 0.075570141 | 0.546951702 | 1 | 0.953105341 |  |

Hellmuth et al.: Cord Blood Metabolome Is Highly Associated with Birth Weight, but Less Predictive for Later Weight Development

|           |     |              |             |   |             |     |             |             |   |             |
|-----------|-----|--------------|-------------|---|-------------|-----|-------------|-------------|---|-------------|
| PCe C40:1 | 562 | 0.026140324  | 0.700734287 | 1 | 0.994294111 | 394 | 0.135920465 | 0.103335183 | 1 | 0.701475916 |
| PCe C40:3 | 509 | 0.004379247  | 0.942279892 | 1 | 0.994294111 | 355 | -0.12226383 | 0.102604401 | 1 | 0.701475916 |
| PCe C40:4 | 636 | -0.06441502  | 0.463810284 | 1 | 0.994294111 | 454 | -0.08775597 | 0.390241156 | 1 | 0.923166264 |
|           |     |              |             |   |             |     | -           |             |   |             |
| PCe C40:5 | 637 | -0.137219672 | 0.085578532 | 1 | 0.994294111 | 456 | 0.080875125 | 0.384694953 | 1 | 0.923166264 |
|           |     |              |             |   |             |     | -           |             |   |             |
| PCe C40:6 | 640 | -0.036726042 | 0.690309745 | 1 | 0.994294111 | 459 | 0.170191961 | 0.113526483 | 1 | 0.701475916 |
| PCe C42:1 | 364 | -0.050198141 | 0.548705577 | 1 | 0.994294111 | 255 | -0.21943445 | 0.034268814 | 1 | 0.651107458 |
| PCe C42:2 | 516 | -0.033532246 | 0.581597886 | 1 | 0.994294111 | 363 | -0.03844441 | 0.613479678 | 1 | 0.953105341 |
| PCe C42:3 | 438 | -0.027573431 | 0.701287654 | 1 | 0.994294111 | 305 | 0.001666737 | 0.984102023 | 1 | 0.995854424 |
|           |     |              |             |   |             |     | -           |             |   |             |
| PCe C42:4 | 593 | -0.137099147 | 0.08327058  | 1 | 0.994294111 | 418 | 0.152380083 | 0.11970047  | 1 | 0.701475916 |
|           |     |              |             |   |             |     | -           |             |   |             |
| PCe C42:5 | 566 | -0.101847686 | 0.202698225 | 1 | 0.994294111 | 397 | 0.076964306 | 0.427835992 | 1 | 0.951252365 |
|           |     |              |             |   |             |     | -           |             |   |             |
| PCe C42:6 | 581 | -0.082754017 | 0.310165618 | 1 | 0.994294111 | 415 | 0.019798811 | 0.831888354 | 1 | 0.953105341 |
| Phe       | 644 | 0.213508708  | 0.140294888 | 1 | 0.994294111 | 461 | 0.17779971  | 0.320969948 | 1 | 0.921550027 |
| Pro       | 644 | 0.140342887  | 0.28609183  | 1 | 0.994294111 | 461 | 0.086075304 | 0.586731631 | 1 | 0.953105341 |
| Ser       | 642 | 0.048255459  | 0.650525369 | 1 | 0.994294111 | 460 | 0.109604156 | 0.384870326 | 1 | 0.923166264 |
| SM C21:2  | 418 | -0.036629327 | 0.530898634 | 1 | 0.994294111 | 287 | 0.058757677 | 0.399798328 | 1 | 0.923166264 |
| SM C30:1  | 517 | 0.043823161  | 0.510908564 | 1 | 0.994294111 | 359 | -0.03760557 | 0.640176323 | 1 | 0.953105341 |

Hellmuth et al.: Cord Blood Metabolome Is Highly Associated with Birth Weight, but Less Predictive for Later Weight Development

|          |     |              |             |   |             |     |             |               |   |             |
|----------|-----|--------------|-------------|---|-------------|-----|-------------|---------------|---|-------------|
| SM C31:1 | 357 | 0.008352441  | 0.902726688 | 1 | 0.994294111 | 249 | 0.013228708 | 0.874089546   | 1 | 0.953105341 |
| SM C32:1 | 643 | 0.038997162  | 0.711507305 | 1 | 0.994294111 | 460 | 0.041049351 | 0.741833035   | 1 | 0.953105341 |
| SM C32:2 | 642 | 0.135828291  | 0.110507784 | 1 | 0.994294111 | 460 | 0.154102821 | 0.116711961   | 1 | 0.701475916 |
|          |     |              |             |   |             |     |             |               |   | -           |
| SM C33:1 | 642 | 0.046182051  | 0.660833737 | 1 | 0.994294111 | 459 | 0.087429482 | 0.492018968   | 1 | 0.953105341 |
| SM C34:0 | 635 | 0.044918773  | 0.687223304 | 1 | 0.994294111 | 452 | 0.114777282 | 0.372291948   | 1 | 0.923166264 |
| SM C34:1 | 642 | -0.0425506   | 0.739190543 | 1 | 0.994294111 | 459 | 0.029805786 | 0.843406468   | 1 | 0.953105341 |
| SM C34:2 | 644 | 0.005688351  | 0.957408286 | 1 | 0.994294111 | 461 | 0.12112015  | 0.327649944   | 1 | 0.921550027 |
|          |     |              |             |   |             |     |             |               |   | -           |
| SM C35:1 | 642 | 0.058144232  | 0.571438599 | 1 | 0.994294111 | 459 | 0.034328889 | 0.778019093   | 1 | 0.953105341 |
| SM C35:2 | 563 | 0.039548893  | 0.643497031 | 1 | 0.994294111 | 400 | 0.028366489 | 0.773963356   | 1 | 0.953105341 |
| SM C36:0 | 443 | 0.166302771  | 0.183106043 | 1 | 0.994294111 | 315 | 0.207105124 | 0.143598154   | 1 | 0.701475916 |
| SM C36:1 | 643 | -0.041317847 | 0.731049689 | 1 | 0.994294111 | 460 | 0.019605268 | 0.888292889   | 1 | 0.953105341 |
| SM C36:2 | 644 | -0.039878669 | 0.703764446 | 1 | 0.994294111 | 461 | 0.080419136 | 0.508928182   | 1 | 0.953105341 |
|          |     |              |             |   |             |     |             |               |   | -           |
| SM C36:3 | 594 | 0.021827863  | 0.77724244  | 1 | 0.994294111 | 421 | 0.042165361 | 0.638457399   | 1 | 0.953105341 |
|          |     |              |             |   |             |     |             |               |   | -           |
| SM C37:2 | 387 | -0.008000805 | 0.936815656 | 1 | 0.994294111 | 272 | 0.245509834 | 0.023522306   | 1 | 0.651107458 |
| SM C37:3 | 613 | -0.022421899 | 0.715761545 | 1 | 0.994294111 | 439 | 0.04700295  | 0.506837126   | 1 | 0.953105341 |
| SM C38:1 | 538 | 0.05557435   | 0.638039823 | 1 | 0.994294111 | 381 | 0.040364178 | 0.766331763   | 1 | 0.953105341 |
| SM C38:2 | 642 | -0.0692693   | 0.515159693 | 1 | 0.994294111 | 459 |             | - 0.648401924 | 1 | 0.953105341 |



Hellmuth et al.: Cord Blood Metabolome Is Highly Associated with Birth Weight, but Less Predictive for Later Weight Development

| 0.056123465 |     |              |             |   |             |     |             |             |   |             |
|-------------|-----|--------------|-------------|---|-------------|-----|-------------|-------------|---|-------------|
| SM C38:3    | 631 | 0.061854487  | 0.438924868 | 1 | 0.994294111 | 448 | 0.089069989 | 0.34615441  | 1 | 0.921550027 |
| -           |     |              |             |   |             |     |             |             |   |             |
| SM C39:1    | 639 | -0.015655952 | 0.858020201 | 1 | 0.994294111 | 458 | 0.095906324 | 0.344231886 | 1 | 0.921550027 |
| SM C39:4    | 456 | 0.055076677  | 0.514988132 | 1 | 0.994294111 | 318 | -0.00849119 | 0.931301524 | 1 | 0.983040498 |
| SM C39:5    | 602 | 0.05846366   | 0.451223258 | 1 | 0.994294111 | 424 | 0.039351935 | 0.661441842 | 1 | 0.953105341 |
| SM C40:1    | 589 | 0.007652939  | 0.947662597 | 1 | 0.994294111 | 421 | 0.013860793 | 0.917257405 | 1 | 0.973130952 |
| SM C40:2    | 643 | -0.136612391 | 0.18582085  | 1 | 0.994294111 | 460 | 0.017272625 | 0.883372267 | 1 | 0.953105341 |
| -           |     |              |             |   |             |     |             |             |   |             |
| SM C40:3    | 389 | 0.067730118  | 0.517982446 | 1 | 0.994294111 | 276 | 0.030651258 | 0.792481972 | 1 | 0.953105341 |
| SM C40:4    | 633 | -0.06203006  | 0.545815044 | 1 | 0.994294111 | 450 | 0.081485057 | 0.496691516 | 1 | 0.953105341 |
| SM C40:5    | 579 | -0.041670219 | 0.604777372 | 1 | 0.994294111 | 407 | 0.107818325 | 0.249689933 | 1 | 0.875593718 |
| -           |     |              |             |   |             |     |             |             |   |             |
| SM C41:1    | 641 | 0.030028899  | 0.743500778 | 1 | 0.994294111 | 458 | 0.084054344 | 0.454171898 | 1 | 0.953105341 |
| -           |     |              |             |   |             |     |             |             |   |             |
| SM C41:2    | 642 | 0.016599773  | 0.850461555 | 1 | 0.994294111 | 459 | 0.106356815 | 0.306695271 | 1 | 0.921550027 |
| SM C41:5    | 493 | -0.054028844 | 0.485561353 | 1 | 0.994294111 | 345 | 0.132845446 | 0.157748173 | 1 | 0.701475916 |
| SM C42:1    | 643 | 0.047293909  | 0.677400802 | 1 | 0.994294111 | 460 | 0.050317946 | 0.705161581 | 1 | 0.953105341 |
| SM C42:2    | 640 | -0.008247991 | 0.942582471 | 1 | 0.994294111 | 457 | 0.056928007 | 0.667276243 | 1 | 0.953105341 |
| SM C42:3    | 644 | -0.012751105 | 0.888777414 | 1 | 0.994294111 | 461 | 0.146766605 | 0.15166799  | 1 | 0.701475916 |
| SM C42:4    | 419 | -0.005224403 | 0.967168704 | 1 | 0.994294111 | 298 | 0.064591448 | 0.650613824 | 1 | 0.953105341 |

|                        |                                            |
|------------------------|--------------------------------------------|
| Obes Facts             |                                            |
| DOI: 10.1159/000453001 | © 2017 The Author(s)<br>www.karger.com/ofa |

Hellmuth et al.: Cord Blood Metabolome Is Highly Associated with Birth Weight, but Less Predictive for Later Weight Development

|          |     |              |             |   |             |     |             |             |   |             |
|----------|-----|--------------|-------------|---|-------------|-----|-------------|-------------|---|-------------|
| SM C42:5 | 384 | 0.008289462  | 0.920894969 | 1 | 0.994294111 | 265 | 0.003225348 | 0.971344881 | 1 | 0.991158668 |
|          |     |              |             |   |             |     |             | -           |   |             |
| SM C42:6 | 632 | -0.033048222 | 0.728600553 | 1 | 0.994294111 | 450 | 0.077656206 | 0.485803544 | 1 | 0.953105341 |
|          |     |              |             |   |             |     |             | -           |   |             |
| SM C43:0 | 313 | -0.055868595 | 0.625548303 | 1 | 0.994294111 | 212 | 0.290410161 | 0.038623428 | 1 | 0.672691379 |
|          |     |              |             |   |             |     |             | -           |   |             |
| SM C43:2 | 607 | 0.030462777  | 0.712070978 | 1 | 0.994294111 | 431 | 0.005311938 | 0.95817856  | 1 | 0.991158668 |
|          |     |              |             |   |             |     |             | -           |   |             |
| SM C44:6 | 388 | -0.100308488 | 0.241095505 | 1 | 0.994294111 | 272 | 0.116516499 | 0.258992536 | 1 | 0.875593718 |
| Thr      | 642 | -0.021521953 | 0.860067881 | 1 | 0.994294111 | 460 | 0.132448746 | 0.353090548 | 1 | 0.921550027 |
| Trp      | 639 | 0.247155363  | 0.102966203 | 1 | 0.994294111 | 457 | 0.261975085 | 0.143979374 | 1 | 0.701475916 |
| Tyr      | 641 | 0.370859077  | 0.01095203  | 1 | 0.994294111 | 459 | 0.215044452 | 0.207670235 | 1 | 0.809600815 |
| Val      | 640 | 0.202455049  | 0.22779758  | 1 | 0.994294111 | 459 | 0.329510142 | 0.093007899 | 1 | 0.701475916 |
